# Supplementary material for: Protocol for a gallbladder cancer registry study in China: the Chinese Research Group of Gallbladder Cancer (CRGGC) study
Source: PubMed Central journal article supplement — BMJ Open. 2021 Feb 16;11(2):e038634. doi: 10.1136/bmjopen-2020-038634 (PMC7888310; doi:10.1136/bmjopen-2020-038634), 2021-02-16
Supplement: bmjopen-2020-038634.draft_revisions.pdf [file bmjopen-2020-038634.draft_revisions.pdf]

# BMJ Open

BMJ Open is committed to open peer review. As part of this commitment we make the peer review history of every article we publish publicly available.

When an article is published we post the peer reviewers' comments and the authors' responses online. We also post the versions of the paper that were used during peer review. These are the versions that the peer review comments apply to.

The versions of the paper that follow are the versions that were submitted during the peer review process. They are not the versions of record or the final published versions. They should not be cited or distributed as the published version of this manuscript.

BMJ Open is an open access journal and the full, final, typeset and author-corrected version of record of the manuscript is available on our site with no access controls, subscription charges or pay-per-view fees (<http://bmjopen.bmj.com>).

If you have any questions on BMJ Open's open peer review process please email [info.bmjopen@bmj.com](mailto:info.bmjopen@bmj.com)

# BMJ Open

## Protocol for a national gallbladder cancer registry study in China: the Chinese Research Group of Gallbladder Cancer (CRGGC) study

|                               |                                                                                                                                                                                                                                                                                                                                                                                                                                                                                                                                                                                                                                                                                                                                                                                                                                                                                                                                                                                                                                                                                                                                                                                                                                                                                                                                                                                                                                                                                                                                                                                                                                                                                                                                                                                                                                                                                                                                                                                                                                                                                                                                                                                                                                                                                                                                                                                                                                                                                                                                                 |
|-------------------------------|-------------------------------------------------------------------------------------------------------------------------------------------------------------------------------------------------------------------------------------------------------------------------------------------------------------------------------------------------------------------------------------------------------------------------------------------------------------------------------------------------------------------------------------------------------------------------------------------------------------------------------------------------------------------------------------------------------------------------------------------------------------------------------------------------------------------------------------------------------------------------------------------------------------------------------------------------------------------------------------------------------------------------------------------------------------------------------------------------------------------------------------------------------------------------------------------------------------------------------------------------------------------------------------------------------------------------------------------------------------------------------------------------------------------------------------------------------------------------------------------------------------------------------------------------------------------------------------------------------------------------------------------------------------------------------------------------------------------------------------------------------------------------------------------------------------------------------------------------------------------------------------------------------------------------------------------------------------------------------------------------------------------------------------------------------------------------------------------------------------------------------------------------------------------------------------------------------------------------------------------------------------------------------------------------------------------------------------------------------------------------------------------------------------------------------------------------------------------------------------------------------------------------------------------------|
| Journal:                      | <i>BMJ Open</i>                                                                                                                                                                                                                                                                                                                                                                                                                                                                                                                                                                                                                                                                                                                                                                                                                                                                                                                                                                                                                                                                                                                                                                                                                                                                                                                                                                                                                                                                                                                                                                                                                                                                                                                                                                                                                                                                                                                                                                                                                                                                                                                                                                                                                                                                                                                                                                                                                                                                                                                                 |
| Manuscript ID                 | bmjopen-2020-038634                                                                                                                                                                                                                                                                                                                                                                                                                                                                                                                                                                                                                                                                                                                                                                                                                                                                                                                                                                                                                                                                                                                                                                                                                                                                                                                                                                                                                                                                                                                                                                                                                                                                                                                                                                                                                                                                                                                                                                                                                                                                                                                                                                                                                                                                                                                                                                                                                                                                                                                             |
| Article Type:                 | Protocol                                                                                                                                                                                                                                                                                                                                                                                                                                                                                                                                                                                                                                                                                                                                                                                                                                                                                                                                                                                                                                                                                                                                                                                                                                                                                                                                                                                                                                                                                                                                                                                                                                                                                                                                                                                                                                                                                                                                                                                                                                                                                                                                                                                                                                                                                                                                                                                                                                                                                                                                        |
| Date Submitted by the Author: | 19-Mar-2020                                                                                                                                                                                                                                                                                                                                                                                                                                                                                                                                                                                                                                                                                                                                                                                                                                                                                                                                                                                                                                                                                                                                                                                                                                                                                                                                                                                                                                                                                                                                                                                                                                                                                                                                                                                                                                                                                                                                                                                                                                                                                                                                                                                                                                                                                                                                                                                                                                                                                                                                     |
| Complete List of Authors:     | <p>Ren, Tai; Xinhua Hospital Affiliated to Shanghai Jiaotong University School of Medicine, Department of General Surgery; Shanghai Key Laboratory of Biliary Tract Disease Research</p> <p>Li, Yongsheng; Xinhua Hospital Affiliated to Shanghai Jiaotong University School of Medicine, Department of General Surgery; Shanghai Key Laboratory of Biliary Tract Disease Research</p> <p>Zhang, Xi; Xinhua Hospital Affiliated to Shanghai Jiaotong University School of Medicine, Clinical Research Unit</p> <p>Geng, Yajun; Xinhua Hospital Affiliated to Shanghai Jiaotong University School of Medicine, Department of General Surgery; Shanghai Key Laboratory of Biliary Tract Disease Research</p> <p>Shao, Ziyu; Xinhua Hospital Affiliated to Shanghai Jiaotong University School of Medicine, Department of General Surgery; Shanghai Key Laboratory of Biliary Tract Disease Research</p> <p>Li, Maolan; Xinhua Hospital Affiliated to Shanghai Jiaotong University School of Medicine, Department of General Surgery; Shanghai Key Laboratory of Biliary Tract Disease Research</p> <p>Wu, Xiangsong; Xinhua Hospital Affiliated to Shanghai Jiaotong University School of Medicine, Department of General Surgery; Shanghai Key Laboratory of Biliary Tract Disease Research</p> <p>Wang, Xu-An; Xinhua Hospital Affiliated to Shanghai Jiaotong University School of Medicine, Department of General Surgery; Shanghai Key Laboratory of Biliary Tract Disease Research</p> <p>Liu, Fatao; Shanghai Key Laboratory of Biliary Tract Disease Research</p> <p>Wu, Wenguang; Xinhua Hospital Affiliated to Shanghai Jiaotong University School of Medicine, Department of General Surgery; Shanghai Key Laboratory of Biliary Tract Disease Research</p> <p>Shu, Yijun; Xinhua Hospital Affiliated to Shanghai Jiaotong University School of Medicine, Department of General Surgery; Shanghai Key Laboratory of Biliary Tract Disease Research</p> <p>Bao, Runfa; Xinhua Hospital Affiliated to Shanghai Jiaotong University School of Medicine, Department of General Surgery; Shanghai Key Laboratory of Biliary Tract Disease Research</p> <p>Gong, Wei; Xinhua Hospital Affiliated to Shanghai Jiaotong University School of Medicine, Department of General Surgery; Shanghai Key Laboratory of Biliary Tract Disease Research</p> <p>Dong, Ping; Xinhua Hospital Affiliated to Shanghai Jiaotong University School of Medicine, Department of General Surgery; Shanghai Key Laboratory of Biliary Tract Disease Research</p> |

1  
2  
3  
4  
5  
6  
7  
8  
9  
10  
11  
12  
13  
14  
15  
16  
17  
18  
19  
20  
21  
22  
23  
24  
25  
26  
27  
28  
29  
30  
31  
32  
33  
34  
35  
36  
37  
38  
39  
40  
41  
42  
43  
44  
45  
46  
47  
48  
49  
50  
51  
52  
53  
54  
55  
56  
57  
58  
59  
60

|                                                                                                                                                |
|------------------------------------------------------------------------------------------------------------------------------------------------|
| Dang, Xueyi; Shanxi Provincial Cancer Hospital, Department of General Surgery                                                                  |
| Liu, Chang; Xi'an Jiaotong University Medical College First Affiliated Hospital, Department of Hepatobiliary Surgery                           |
| Liu, Changjun; Hunan Provincial People's Hospital, Department of Hepatobiliary Surgery                                                         |
| Sun, Bei ; First Affiliated Hospital of Harbin Medical University, Department of HPB Surgery                                                   |
| Liu, Jun; Shandong Provincial Hospital, Department of Hepatobiliary Surgery                                                                    |
| Wang, Lin; Xijing Hospital, Department of Hepatobiliary Surgery                                                                                |
| Hong, Defei; Zhejiang University School of Medicine Sir Run Run Shaw Hospital, Department of HPB Surgery                                       |
| Qin, Renyi; Tongji Hospital of Tongji Medical College of Huazhong University of Science and Technology, Department of Pancreatobiliary Surgery |
| Jiang, Xiaoqing; Eastern Hepatobiliary Surgery Hospital, Department of Biliary Surgery                                                         |
| Zhang, Xuewen; Jilin University Second Hospital, Department of HPB Surgery                                                                     |
| Xu, Junmin; Shanghai No1 People's Hospital, Department of General Surgery                                                                      |
| Jia, Jianguang; First Affiliated Hospital of Bengbu Medical College, Department of Surgical Oncology                                           |
| Yang, Bo; Wenzhou Medical University First Affiliated Hospital, Department of General Surgery                                                  |
| Li, Bing; Tumor Hospital of Harbin Medical University, Department of HPB Surgery                                                               |
| Dai, Chaoliu; Shengjing Hospital of China Medical University, Department of Hepatobiliary Surgery                                              |
| Cao, Jingyu; The Affiliated Hospital of Qingdao University, Department of HPB Surgery                                                          |
| Cao, Hong; China-Japan Union Hospital of Jilin University, Department of GI Surgery                                                            |
| Tao, Feng; Shaoxing People's Hospital, Department of GI Surgery                                                                                |
| Zhang, Zaiyang; Shaoxing Second Hospital, Department of General Surgery                                                                        |
| Wang, Yi; First Peoples of Hospital of Taicang, Department of GI Surgery                                                                       |
| Jin, Huihan; Wuxi Second People's Hospital, Department of Hepatobiliary Surgery                                                                |
| Cai, Hongyu; Nantong Tumor Hospital, Department of Hepatobiliary Surgery                                                                       |
| Fei, Zhewei; Shanghai Jiaotong University School of Medicine Xinhua Hospital Chongming Branch, Department of General Surgery                   |
| Gu, Jianfeng; Changshu No. 1 People's Hospital, Department of General Surgery                                                                  |
| Han, Wei; Xinjiang Medical University Affiliated First Hospital, Department of Pancreatic Surgery                                              |
| Feng, Xuedong; Tongliao City Hospital, Department of General Surgery                                                                           |
| Fang, Lu; Nanchang University Second Affiliated Hospital, Department of Hepatobiliary Surgery                                                  |
| Zheng, Linhui; First Affiliated Hospital of Nanchang University, Department of General Surgery                                                 |
| Zhu, Chunfu; Changzhou No. 2 People's Hospital, Department of HPB Surgery                                                                      |
| Wang, Kunhua; Kunming Medical University First Affiliated Hospital, Department of General Surgery                                              |
| Zhang, Xueli; Shanghai Fengxian Central Hospital, Department of General Surgery                                                                |
| Li, Xiaoyong; The Fifth Affiliated Hospital of Zhengzhou University, Department of HPB Surgery                                                 |

|           |                                                                                                                                                                                                                                                                                                                                                                                                                                                                                                                                                                                                                                                                                                                                                                                                                                                                                                                                                                                                                                                                                                                                                                                                                                                                                                                                                                                                                                                                                                                                                                                                                                                                                                                                                                                                                                                                                                                                                                                                                                                                                                                                                                                                                                                                                                                                                                                                                                                                                                                               |
|-----------|-------------------------------------------------------------------------------------------------------------------------------------------------------------------------------------------------------------------------------------------------------------------------------------------------------------------------------------------------------------------------------------------------------------------------------------------------------------------------------------------------------------------------------------------------------------------------------------------------------------------------------------------------------------------------------------------------------------------------------------------------------------------------------------------------------------------------------------------------------------------------------------------------------------------------------------------------------------------------------------------------------------------------------------------------------------------------------------------------------------------------------------------------------------------------------------------------------------------------------------------------------------------------------------------------------------------------------------------------------------------------------------------------------------------------------------------------------------------------------------------------------------------------------------------------------------------------------------------------------------------------------------------------------------------------------------------------------------------------------------------------------------------------------------------------------------------------------------------------------------------------------------------------------------------------------------------------------------------------------------------------------------------------------------------------------------------------------------------------------------------------------------------------------------------------------------------------------------------------------------------------------------------------------------------------------------------------------------------------------------------------------------------------------------------------------------------------------------------------------------------------------------------------------|
|           | <p>Jin, Chong; Taizhou Hospital of Zhejiang Province, Department of General Surgery</p> <p>Qian, Yeben; First Affiliated Hospital of Anhui Medical University, Department of HPB Surgery</p> <p>Cui, Yunfu; Second Affiliated Hospital of Harbin Medical University, Department of Pancreatobiliary Surgery</p> <p>Xu, Yuzhen; Xuzhou Municipal Fourth People's Hospital, Department of GI Surgery</p> <p>Wang, Xiang; Xinghua City People's Hospital, Department of HPB Surgery</p> <p>Liu, Houbao; Zhong Shan Hospital, Department of General Surgery</p> <p>Hua, Yawei; Henan Cancer Hospital, Department of General Surgery</p> <p>Liu, Chao; Sun Yat-Sen Memorial Hospital, Department of Pancreatobiliary Surgery</p> <p>Hao, Jihui; Tianjin Medical University Cancer Institute and Hospital, Department of Pancreatic Surgery</p> <p>Wang, Chuanlei; Jilin University First Hospital, Department of HPB Surgery</p> <p>Li, Qiyun; Jiangxi Cancer Hospital, Department of Abdominal Surgery</p> <p>Li, Xun; Lanzhou University First Affiliated Hospital, Department of General Surgery</p> <p>Liu, Jiansheng; First Hospital of Shanxi Medical University, Department of General Surgery</p> <p>Li, Mingzhang; Baotou City Central Hospital, Department of General Surgery</p> <p>Qiu, Yudong; Nanjing Drum Tower Hospital, Department of Pancreatobiliary Surgery</p> <p>Wu, Buqiang; Changzhi Medical College Affiliated Heping Hospital, Department of General Surgery</p> <p>Zheng, Jinfang; Hainan Provincial People's Hospital, Department of General Surgery</p> <p>Chen, Xiaoliang; Jiangxi Provincial People's Hospital, Department of Hepatobiliary Surgery</p> <p>Zhu, Haihong; Qinghai Provincial People's Hospital, Department of General Surgery</p> <p>Hua, Kejun; Yinzhou People's Hospital, Department of General Surgery</p> <p>Yan, Maolin; Fujian Provincial Hospital, Department of Hepatobiliary Surgery</p> <p>Wang, Peng; Nantong University Affiliated Hospital, Department of HPB Surgery</p> <p>Zang, Hong; The First People's Hospital of Nantong, Department of Hepatobiliary Surgery</p> <p>Ma, Xiaoming; Second Affiliated Hospital of Soochow University, Department of General Surgery</p> <p>Hong, Jian; Xuzhou Medical College Affiliated Hospital, Department of General Surgery</p> <p>Liu, Yingbin; Xinhua Hospital Affiliated to Shanghai Jiaotong University School of Medicine, Department of General Surgery; Shanghai Key Laboratory of Biliary Tract Disease Research</p> |
| Keywords: | ONCOLOGY, Hepatobiliary disease < GASTROENTEROLOGY, SURGERY                                                                                                                                                                                                                                                                                                                                                                                                                                                                                                                                                                                                                                                                                                                                                                                                                                                                                                                                                                                                                                                                                                                                                                                                                                                                                                                                                                                                                                                                                                                                                                                                                                                                                                                                                                                                                                                                                                                                                                                                                                                                                                                                                                                                                                                                                                                                                                                                                                                                   |

SCHOLARONE™  
Manuscripts

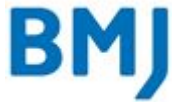

I, the Submitting Author has the right to grant and does grant on behalf of all authors of the Work (as defined in the below author licence), an exclusive licence and/or a non-exclusive licence for contributions from authors who are: i) UK Crown employees; ii) where BMJ has agreed a CC-BY licence shall apply, and/or iii) in accordance with the terms applicable for US Federal Government officers or employees acting as part of their official duties; on a worldwide, perpetual, irrevocable, royalty-free basis to BMJ Publishing Group Ltd ("BMJ") its licensees and where the relevant Journal is co-owned by BMJ to the co-owners of the Journal, to publish the Work in this journal and any other BMJ products and to exploit all rights, as set out in our [licence](#).

The Submitting Author accepts and understands that any supply made under these terms is made by BMJ to the Submitting Author unless you are acting as an employee on behalf of your employer or a postgraduate student of an affiliated institution which is paying any applicable article publishing charge ("APC") for Open Access articles. Where the Submitting Author wishes to make the Work available on an Open Access basis (and intends to pay the relevant APC), the terms of reuse of such Open Access shall be governed by a Creative Commons licence – details of these licences and which [Creative Commons](#) licence will apply to this Work are set out in our licence referred to above.

Other than as permitted in any relevant BMJ Author's Self Archiving Policies, I confirm this Work has not been accepted for publication elsewhere, is not being considered for publication elsewhere and does not duplicate material already published. I confirm all authors consent to publication of this Work and authorise the granting of this licence.

1  
2  
3  
4 **Protocol for a national gallbladder cancer registry study in China: the Chinese**  
5 **Research Group of Gallbladder Cancer (CRGGC) study**  
6  
7  
8  
9

10 Tai Ren<sup>#,1,2,3</sup>; Yongsheng Li<sup>#,1,2</sup>, Xi Zhang<sup>#,4</sup>, Yajun Geng<sup>1,2</sup>, Ziyu Shao<sup>1,2</sup>, Maolan  
11 Li<sup>1,2</sup>, Xiangsong Wu<sup>1,2</sup>, Xu-An Wang<sup>1,2</sup>, Fatao Liu<sup>2,3</sup>, Wenguang Wu<sup>1,2</sup>, Yijun Shu<sup>1,2</sup>,  
12 Runfa Bao<sup>1,2</sup>, Wei Gong<sup>1,2</sup>, Ping Dong<sup>1,2</sup>, Xueyi Dang<sup>5</sup>, Chang Liu<sup>6</sup>, Changjun Liu<sup>7</sup>,  
13 Bei Sun<sup>8</sup>, Jun Liu<sup>9</sup>, Lin Wang<sup>10</sup>, Defei Hong<sup>11</sup>, Renyi Qin<sup>12</sup>, Xiaoqing Jiang<sup>13</sup>,  
14 Xuewen Zhang<sup>14</sup>, Junmin Xu<sup>15</sup>, Jianguang Jia<sup>16</sup>, Bo Yang<sup>17</sup>, Bing Li<sup>18</sup>, Chaoliu Dai<sup>19</sup>,  
15 Jingyu Cao<sup>20</sup>, Hong Cao<sup>21</sup>, Feng Tao<sup>22</sup>, Zaiyang Zhang<sup>23</sup>, Yi Wang<sup>24</sup>, Huihan Jin<sup>25</sup>,  
16 Hongyu Cai<sup>26</sup>, Zhewei Fei<sup>27</sup>, Jianfeng Gu<sup>28</sup>, Wei Han<sup>29</sup>, Xuedong Feng<sup>30</sup>, Lu Fang<sup>31</sup>,  
17 Linhui Zheng<sup>32</sup>, Chunfu Zhu<sup>33</sup>, Kunhua Wang<sup>34</sup>, Xueli Zhang<sup>35</sup>, Xiaoyong Li<sup>36</sup>,  
18 Chong Jin<sup>37</sup>, Yeben Qian<sup>38</sup>, Yunfu Cui<sup>39</sup>, Yuzhen Xu<sup>40</sup>, Xiang Wang<sup>41</sup>, Houbao Liu<sup>42</sup>,  
19 Yawei Hua<sup>43</sup>, Chao Liu<sup>44</sup>, Jihui Hao<sup>45</sup>, Chuanlei Wang<sup>46</sup>, Qiyun Li<sup>47</sup>, Xun Li<sup>48</sup>,  
20 Jiansheng Liu<sup>49</sup>, Mingzhang Li<sup>50</sup>, Yudong Qiu<sup>51</sup>, Buqiang Wu<sup>52</sup>, Jinfang Zheng<sup>53</sup>,  
21 Xiaoliang Chen<sup>54</sup>, Haihong Zhu<sup>55</sup>, Kejun Hua<sup>56</sup>, Maolin Yan<sup>57</sup>, Peng Wang<sup>58</sup>, Hong  
22 Zang<sup>59</sup>, Xiaoming Ma<sup>60</sup>, Jian Hong<sup>61</sup>, Ying-Bin Liu, MD, FACS<sup>1,2,3</sup>, on behalf of the  
23 CRGGC  
24  
25  
26  
27  
28  
29  
30  
31  
32  
33  
34  
35  
36  
37  
38  
39  
40

41 #These authors contributed equally to this work.  
42

43 <sup>1</sup> Department of General Surgery, Xinhua Hospital, Shanghai Jiao Tong University  
44 School of Medicine, Shanghai, China.  
45

46 <sup>2</sup> Shanghai Key Laboratory of Biliary Tract Disease Research, Shanghai, China.  
47

48 <sup>3</sup> State Key Laboratory for Oncogenes and Related Genes, Shanghai, China  
49

50 <sup>4</sup> Clinical Research Unit, Xinhua Hospital Affiliated to Shanghai Jiao Tong  
51 University, School of Medicine, Shanghai, China.  
52

53 <sup>5</sup> Department of General Surgery, Shanxi Provincial Cancer Hospital, Shanxi  
54  
55  
56  
57  
58  
59  
60

1  
2  
3  
4 <sup>6</sup> Department of Hepatobiliary Surgery, The First Affiliated Hospital of Xi'an Jiaotong  
5 University, Shaanxi  
6

7 <sup>7</sup> Department of Hepatobiliary Surgery, People's Hospital of Hunan Province, Hunan  
8  
9

10 <sup>8</sup> Department of HPB Surgery, The First Affiliated Hospital of Harbin Medical  
11 University, Heilongjiang  
12  
13

14 <sup>9</sup> Department of Hepatobiliary Surgery, Shangdong Provincial Hospital, Shandong  
15  
16

17 <sup>10</sup> Department of Hepatobiliary Surgery, Xijing Hospital, Shaanxi  
18  
19

20 <sup>11</sup> Department of HPB Surgery, Sir Run Run Shaw Hospital, Zhejiang  
21  
22

23 <sup>12</sup> Department of Pancreatobiliary Surgery, Tongji Hospital, Hubei  
24  
25

26 <sup>13</sup> Department of Biliary Surgery, Eastern Hepatobiliary Surgery Hospital, Shanghai  
27  
28

29 <sup>14</sup> Department of HPB Surgery, The Second Hospital of Jilin University, Jilin  
30  
31

32 <sup>15</sup> Department of General Surgery, Shanghai General Hospital, Shanghai  
33  
34

35 <sup>16</sup> Department of Surgical Oncology, The First Affiliated Hospital of Bengbu Medical  
36 College, Anhui  
37  
38

39 <sup>17</sup> Department of General Surgery, The First Affiliated Hospital of Wenzhou Medical  
40 University, Zhejiang  
41  
42

43 <sup>18</sup> Department of HPB Surgery, Harbin Medical University Cancer Hospital,  
44 Heilongjiang  
45  
46

47 <sup>19</sup> Department of Hepatobiliary Surgery, Shengjing Hospital of China Medical  
48 University, Liaoning  
49  
50

51 <sup>20</sup> Department of HPB Surgery, The Affiliated Hospital of Qingdao University,  
52 Shandong  
53  
54

55 <sup>21</sup> Department of GI Surgery, China-Japan Union Hospital of Jilin University, Jilin  
56  
57

58 <sup>22</sup> Department of GI Surgery, Shaoxing People's Hospital, Zhejiang  
59  
60

- 1  
2  
3  
4 23 Department of General Surgery, Shaoxing Second Hospital, Zhejiang  
5  
6 24 Department of GI Surgery, The First People's Hospital of Taicang, Jiangsu  
7  
8 25 Department of Hepatobiliary Surgery, Wuxi Second People's Hospital, Jiangsu  
9  
10  
11 26 Department of Hepatobiliary Surgery, Nantong Tumor Hospital, Jiangsu  
12  
13 27 Department of General Surgery, Xinhua (Chongming) Hospital Affiliated to  
14  
15 Shanghai Jiao Tong University School of Medicine, Shanghai  
16  
17 28 Department of General Surgery, Changshu No. 1 People's Hospital, Jiangsu  
18  
19 29 Department of Pancreatic Surgery, The First Affiliated Hospital of Xinjiang  
20  
21 Medical University, Xinjiang  
22  
23  
24 30 Department of General Surgery, Tongliao City Hospital, Inner Mongolia  
25  
26  
27 31 Department of Hepatobiliary Surgery, The Second Affiliated Hospital of Nanchang  
28  
29 University, Jiangxi  
30  
31 32 Department of General Surgery, The First Affiliated Hospital of Nanchang  
32  
33 University, Jiangxi  
34  
35  
36 33 Department of HPB Surgery, Changzhou No. 2 People's Hospital, Jiangsu  
37  
38 34 Department of General Surgery, The First Affiliated Hospital of Kunming Medical  
39  
40 University, Yunnan  
41  
42  
43 35 Department of General Surgery, Shanghai Fengxian District Central Hospital,  
44  
45 Shanghai  
46  
47 36 Department of HPB Surgery, The Fifth Affiliated Hospital of Zhengzhou  
48  
49 University, Henan  
50  
51  
52 37 Department of General Surgery, Taizhou Municipal Hospital, Zhejiang  
53  
54 38 Department of HPB Surgery, The First Affiliated Hospital of Anhui Medical  
55  
56 University, Anhui  
57  
58 39 Department of Pancreatobiliary Surgery, The Second Affiliated Hospital of Harbin  
59  
60



1  
2  
3  
4 Medical University, Heilongjiang  
5

6 <sup>40</sup> Department of GI Surgery, Xuzhou Central Hospital, Jiangsu  
7

8 <sup>41</sup> Department of HPB Surgery, Xinghua City People's Hospital, Jiangsu  
9

10 <sup>42</sup> Department of General Surgery, Zhongshan Hospital, Shanghai  
11  
12

13 <sup>43</sup> Department of General Surgery, Henan Cancer Hospital, Henan  
14

15 <sup>44</sup> Department of Pancreatobiliary Surgery, Sun Yat-Sen Memorial Hospital, Sun Yat-  
16  
17  
18 Sen University, Guangdong  
19

20 <sup>45</sup> Department of Pancreatic Surgery, Tianjin Medical University Cancer Hospital,  
21  
22  
23 Tianjin  
24

25 <sup>46</sup> Department of HPB Surgery, The First Bethune Hospital of Jilin University, Jilin  
26

27 <sup>47</sup> Department of Abdominal Surgery, Jiangxi Cancer Hospital, Jiangxi  
28

29 <sup>48</sup> Department of General Surgery, The First Hospital of Lanzhou University, Gansu  
30

31 <sup>49</sup> Department of General Surgery, First Hospital of Shanxi Medical University,  
32  
33  
34 Shanxi  
35

36 <sup>50</sup> Department of General Surgery, Baotou City Central Hospital, Inner Mongolia  
37

38 <sup>51</sup> Department of Pancreatobiliary Surgery, Nanjing Drum Tower Hospital, the  
39  
40  
41 Affiliated Hospital of Nanjing University Medical School, Jiangsu  
42

43 <sup>52</sup> Department of General Surgery, Heping Hospital Affiliated to Changzhi Medical  
44  
45  
46 College, Shanxi  
47

48 <sup>53</sup> Department of General Surgery, Hainan Provincial People's Hospital, Hainan  
49

50 <sup>54</sup> Department of Hepatobiliary Surgery, Jiangxi Provincial People's Hospital, Jiangxi  
51

52 <sup>55</sup> Department of General Surgery, Qinghai Provincial People's Hospital, Qinghai  
53

54 <sup>56</sup> Department of General Surgery, Yinzhou Hospital Affiliated to the Medical School  
55  
56  
57 of Ningbo University, Zhejiang  
58  
59  
60

1  
2  
3  
4 <sup>57</sup> Department of Hepatobiliary Surgery, Fujian Provincial Hospital, Fujian

5  
6 <sup>58</sup> Department of HPB Surgery, Affiliated Hospital of Nantong University, Jiangsu

7  
8  
9 <sup>59</sup> Department of Hepatobiliary Surgery, The First People's Hospital of Nantong,  
10 Jiangsu

11  
12  
13 <sup>60</sup> Department of General Surgery, The Second Affiliated Hospital of Suzhou  
14 University, Jiangsu

15  
16  
17 <sup>61</sup> Department of General Surgery, The Affiliated Hospital of Xuzhou Medical  
18 University, Jiangsu  
19

20  
21  
22  
23  
24 **Corresponding Authors:**

25  
26 **Ying-Bin Liu**, Ph.D., M.D., FACS,

27  
28  
29 Department of General Surgery, Xinhua Hospital, Shanghai Jiao Tong University  
30 School of Medicine

31  
32  
33 Address: No. 1665 Kongjiang Road, Shanghai, 200092, China.

34  
35  
36 E-mail: [liuyingbin@xinquamed.com.cn](mailto:liuyingbin@xinquamed.com.cn)

37  
38  
39  
40  
41 **Keywords:** gallbladder cancer, cohort study, China, clinical epidemiology, tumour  
42 staging  
43  
44  
45  
46  
47  
48  
49  
50  
51  
52  
53  
54  
55  
56  
57  
58  
59  
60

## Abstract

### Introduction

Gallbladder cancer (GBC), the sixth most common gastrointestinal tract cancer and poses a significant disease burden in China. However, no national representative data are available on the clinical characteristics, treatment and prognosis of GBC in the Chinese population.

### Methods and analysis

The Chinese Research Group of Gallbladder Cancer (CRGGC) study is a multicentre retrospective registry cohort study. Clinically diagnosed GBC patients are identified from January 1, 2008, by reviewing the electronic medical records (EMRs) from 76 tertiary and secondary hospitals across 28 provinces in China. Patients with pathological and radiological diagnoses of malignancy, including cancer in situ, from the gallbladder and cystic duct are eligible, according to the National Comprehensive Cancer Network (NCCN) 2019 guidelines. Patients are excluded if GBC is the secondary diagnosis in the discharge summary. The demographic characteristics, medical history, physical examination results, surgery information, pathological data, laboratory examination results, and radiology reports are collected in a standardized case report form. By May 2021, approximately 6,000 GBC patients will be included. The clinical follow-up data will be updated until 5 years after the last admission for GBC of each patient.

The study aimed (1) to depict the clinical characteristics, including demographics, pathology, treatment, and prognosis of GBC patients in China; (2) to evaluate the adherence to clinical guidelines of GBC; and (3) to improve clinical practice for diagnosing and treating GBC and provide references for policy makers.

### Ethics and dissemination

The protocol of the CRGGC has been approved by the Committee for Ethics of Xinhua Hospital, Shanghai Jiao Tong University School of Medicine (SHEC-C-2019-

085) and registered in ClinicalTrials.gov (NCT04140552). All results of this study will be published in peer-reviewed journals and presented at relevant conferences.

**Study registration number:** NCT04140552

### **Strengths and limitations of this study**

1. The Chinese Research Group of Gallbladder Cancer (CRGGC) study is the first large-scale registry cohort study of gallbladder cancer (GBC) in China, covering 76 tertiary and secondary hospitals across 28 provinces.
2. A standardized quality control and data management plan was designed to ensure the accuracy and reliability of the data.
3. The EMR systems are not consistent across hospitals, which may introduce variance in data recording and result in difficulty in systematic data formatting and integration.
4. This is a retrospective study using convenience sampling. The study population may not be completely representative of GBC patients in China.
5. There is a lack of biospecimens from involved patients.

## INTRODUCTION

Gallbladder cancer (GBC) is the most common type of biliary tract cancer<sup>1-3</sup> and one of the most lethal malignancies, with a 5-year survival rate of 5%<sup>1</sup>. Much effort has been made to optimize the treatment of GBC; however, the prognosis remains dismal<sup>4,5</sup>, and the quality of current evidence for GBC is still far from perfect. Due to its relatively low incidence, clinical trials on GBC are difficult to conduct. Most recommendations and guidelines for GBC from the National Comprehensive Cancer Network (NCCN; 2019 version 4) and American Joint Committee on Cancer (AJCC; 8<sup>th</sup> version) were derived from evidence of moderate quality<sup>6,7</sup>. Most of these studies were single-centre studies with limited sample sizes and generally no more than 300 cases<sup>8-10</sup>, which might introduce systematic bias into the conclusion.

On the other hand, the data of several national cancer registries are limited by flawed coding systems for GBC. The nomenclature of GBC in the literature is inconsistent. GBC defined by the AJCC 8<sup>th</sup> staging manual is a primary cancer in the gallbladder and cystic duct (C23.9 and part of C24.0; ICD-O-3 codes)<sup>7</sup>. However, many epidemiological studies refer to “GBC” as “GBC and extrahepatic cholangiocarcinoma (ECC; C23.9 and C24.0)”, leading to confusion in its incidence, mortality, and other epidemiological features<sup>11,12</sup>. In addition, cystic duct cancer is undistinguishable from ECC in most cancer registry studies, which means that this specific subset of patients is likely to be omitted<sup>13</sup>. Moreover, a commonly used coding system for surgery, the Facility Oncology Registry Data System, classifies GBC as “all other sites”, making it unlikely to define the extent of surgery and distinguish patients who undergo re-resection after GBC is incidentally found<sup>14</sup>. Regarding regional lymph nodes, the Collaborative Stage (version 0204) system defines celiac, superior mesenteric, and para-aortic lymph nodes as regional nodes, which is not consistent with either the AJCC 7<sup>th</sup> or AJCC 8<sup>th</sup> definition<sup>15</sup>. The coding problems in both patient identification and site-specific variables might lead to less stringent interpretation of the conclusions.

1  
2  
3  
4  
5  
6  
7  
8  
9  
10  
11  
12  
13  
14  
15  
16  
17  
18  
19  
20  
21  
22  
23  
24  
25  
26  
27  
28  
29  
30  
31  
32  
33  
34  
35  
36  
37  
38  
39  
40  
41  
42  
43  
44  
45  
46  
47  
48  
49  
50  
51  
52  
53  
54  
55  
56  
57  
58  
59  
60

China is a high-GBC risk country, but little evidence has been based on the Chinese population<sup>11</sup>. Data from GLOBOCAN show that, taking GBC and ECC together, the number of annual new cases in China accounts for 24.7% of new cases worldwide<sup>12</sup>. Currently, the largest retrospective study of GBC in China was conducted by Zou *et al.*<sup>16</sup>, including 3,922 patients from 116 hospitals in 28 provinces of China during 1986-1998. This study described the demographic characteristics of GBC in China, without further data on detailed staging, treatment, and prognosis information. Another study of 2,379 GBC patients from 5 northwestern provinces during 2009-2013<sup>17</sup> reported that 55.1% of GBC patients had advanced-stage tumours. Other reports were mainly single-centre studies with limited sample sizes<sup>18</sup><sup>19</sup>. The critical characteristics in the diagnosis, treatment, and prognosis of GBC in China are unknown.

Therefore, this study aimed to design a national GBC cohort, the Chinese Research Group of Gallbladder Cancer (CRGGC) study, (1) to comprehensively evaluate the clinical characteristics, including demographics, pathology, treatment, and prognosis of GBC patients in China; (2) to evaluate adherence to clinical guidelines of GBC; and (3) to improve clinical practice and guidelines for GBC and provide references for policy makers.

## **METHODS AND ANALYSIS**

### **Registry design**

The CRGGC study is a multicentre retrospective registry cohort study. The project was launched by the Shanghai Key Laboratory of Biliary Tract Disease Research, with collaborators from 76 tertiary and secondary hospitals across 28 provinces in China (until March 8, 2020; see online supplementary file 1). We review the electronic medical records (EMRs) of all diagnosed GBC patients from January 1, 2008, and extract the related clinical and treatment information. The clinical follow-up data will be updated until 5 years after the last admission for GBC of each patient.

## Patient enrolment

Patients are identified with various search strategies: (1) ICD-10 code equals C23.9, or C24.0 with “cystic duct”; (2) discharge diagnosis includes “gallbladder cancer” (search strategy in Chinese: (“胆囊”) AND (“癌” OR “恶性肿瘤” OR “占位”)), which means “gallbladder”/“cystic duct” AND (“cancer” OR “malignancy” OR “space-occupying lesion”)); and (3) pathological reports include “gallbladder cancer”. All 3 search strategies are applied in each centre. The results are merged for subsequent exclusion. These search strategies were designed to be redundant because some search strategies may not be applicable in specific EMR systems and in specific periods.

All identified admissions to the hospital are manually filtered according to the diagnostic criteria of the NCCN 2019 version 4 guidelines for hepatobiliary cancer<sup>6</sup>. Patients with a pathological or radiological diagnosis of malignancy, including cancer in situ, from the gallbladder and cystic duct are eligible. Patients are excluded if GBC is the secondary diagnosis in the discharge summary because patients admitted for other diseases are likely to have obscure cancer traits.

The first phase of this study includes patients diagnosed before December, 31, 2019. According to our preliminary estimation, more than 6,000 cases will meet our inclusion criteria. We expect to finish phase one data collection by May 2021. After finishing enrolment of a short-term target of 2,000 cases, a primary analysis will be performed. The follow-up will be updated until 5 years after the admission of each patient. More centres are expected to participate in the CRGGC study; thus, the collaborator list may be expanded.

## Clinical outcomes and follow-up

The main outcome is the 5-year overall survival (OS) rate. OS is defined as the duration between the date of first diagnosis and the date of death or the date of last contact, whichever comes first. We will also include the following outcomes: disease-

1  
2  
3  
4 free survival (DFS), defined as the duration between the date of first diagnosis and the  
5 date of recurrence; 3-year OS rate; and 90-day mortality (for patients who undergo  
6 surgery), which will be used to indicate perioperative mortality. Clinical follow-up is  
7 defined as the routine practice of hospitals of collecting patient data on treatment,  
8 tumour recurrence and patient survival, either by outpatient/inpatient records or  
9 telephone. We require hospitals to equip such a system and at least one follow-up per  
10 year to join our collaboration. Based on these data, we update patients' follow-up  
11 statuses every 12 months. The data being collected include date of recurrence, date of  
12 death, date of last contact, whether re-resection was performed if the malignancy was  
13 found incidentally, and whether the patient received adjuvant therapy.  
14  
15  
16  
17  
18  
19  
20  
21  
22

### 23 **Data collection**

24  
25  
26 The workflow of data collection and quality control is shown in Fig. 1. Before  
27 data collection, a group of hepatobiliary specialists designed a structured case report  
28 form, aiming to delineate features of GBC patients and answer corresponding clinical  
29 questions. The case report form includes the following information: demographic  
30 characteristics, medical history, physical examination results, surgery information,  
31 pathological data, laboratory examination results, and radiology reports. We compiled  
32 a codebook to standardize the definition of each variable. The data centre is  
33 responsible for training doctors to collect data. Data collection is carried out by using  
34 EpiData (v4.6.0.2, EpiData Association, Denmark).  
35  
36  
37  
38  
39  
40  
41  
42  
43

44 Automated logic checks are applied to prevent out-of-range values. Duplicated  
45 entry is required. If any discrepancies are found, a third specialist will be brought in  
46 for discussion and make a final decision.  
47  
48  
49

50 After data entry and quality control in each centre, the data are anonymized and  
51 transferred to the servers in the data centre. The data centre is located at Shanghai Key  
52 Laboratory of Biliary Tract Disease Research, which is equipped with data servers  
53 and essential firewall and backup systems. The data centre is responsible for quality  
54 assessment, storage, sharing, and analysis of the data. A group of researchers in the  
55  
56  
57  
58  
59  
60



1  
2  
3  
4 data centre manage the database.  
5

6 The data manager assesses the quality of the data after transfer to the data centre.  
7  
8 The assessment is based on the structure of missing data and a comparison to baseline  
9 data. First, we apply a grading system, where variables are classified into essential,  
10 important, and normal importance. Based on the proportion of missing values in each  
11 category, the entries are graded as level A, B, C, or D in quality. Entries of category D  
12 quality are normally excluded from analysis. Second, outliers and inconsistent data  
13 are identified. Third, we compare baseline characteristics of the new data to previous  
14 data, with indicators including sex ratio, mean age, proportion of TNM stage, and 5-  
15 year OS. We apply the chi-square test, t-test, and log-rank test between the two  
16 datasets. When a significant difference is found, the data manager analyses and  
17 records suspicious data. The data manager inquires about the data in question with the  
18 data source and asks for confirmation. The desensitized data are accessible to  
19 collaborators after the completion of the database. A research proposal to the CRGGC  
20 Scientific Committee is essential for analysis of the data.  
21  
22  
23  
24  
25  
26  
27  
28  
29  
30  
31  
32

### 33 **Demographic data and medical history**

34  
35  
36 The EMR data for each patient are collected for every hospital visit from January  
37 1, 2008. The baseline data are retrieved, including the following aspects: (1)  
38 demographics: age at diagnosis, sex, race, and date of diagnosis; (2) medical history:  
39 emergency operation, chief complaint, endoscopic retrograde cannulation of the  
40 pancreas (ERCP) performed within 30 days before surgery, percutaneous transhepatic  
41 cholangial drainage (PTCD) performed within 30 days before surgery, neoadjuvant  
42 therapy, and method of diagnosis (pathology, radiology, or other); (3) past medical  
43 history: history of gallstone, history of gallbladder polyps, history of other  
44 malignancies, hypertension, diabetes mellitus, and other comorbidities; (4) social and  
45 personal history: marital status, smoking history, and use of alcohol; and (5) other  
46 aspects: weight, height, family history, and total expenditure.  
47  
48  
49  
50  
51  
52  
53  
54  
55  
56  
57  
58  
59  
60

## Surgery information

1. The preoperative and intraoperative diagnoses are recorded. A diagnosis of “gallbladder cancer”, “gallbladder tumour”, or “space-occupying lesion in gallbladder” is regarded as the detection of malignancy.
2. Regional lymphadenectomy requires the resection of hilar nodes<sup>7</sup>. Further clearance of lymph nodes is classified as extended lymphadenectomy.
3. The extent of lymphadenectomy includes the cystic duct, common bile duct, portal vein, hepatic artery, common hepatic artery, post-superior pancreatic, celiac, superior mesenteric, suprapyloric, left gastric artery, and paraaortic lymph nodes<sup>7 20 21</sup>.
4. Combined hepatectomy is classified as no hepatectomy, liver wedge resection/partial hepatectomy, IVb+V segmentectomy, hemihepatectomy, extent more than hemihepatectomy, radiofrequency ablation, and hepatectomy for other reasons.
5. If the malignancy is diagnosed after surgery, further treatment information may not be available (the patient may turn to a second hospital for re-resection). Patients in this case are categorized as “simple cholecystectomy performed; further treatment not available”. If re-resection is available, its operative reports will be reviewed as previously mentioned.
6. ERCP, PTCD, and transarterial chemoembolization (TACE) are not defined as surgery but as supportive treatment.
7. Palliative surgery is defined as resection of the primary tumour, reconstruction of the digestive tract, or both when there is evidence of distant metastasis or unresectable tumour.

Other surgery-related variables include date of surgery, laparoscopic surgery, combined bile duct resection, tumour positioned on the hepatic or peritoneal side, perivascular invasion, perforation, porcelain gallbladder, duration of surgery,

1  
2  
3  
4 intraoperative blood loss, and American Society of Anesthesiologists (ASA) score.  
5

### 6 **Pathological data**

7

8 Pathological data are recorded, including size of the tumour (in 3 dimensions),  
9 resection margin, tumour positioned on the hepatic or peritoneal side, tumour  
10 positioned on the fundus, body, neck, or cystic duct, depth of invasion (carcinoma in  
11 situ or lamina propria, muscularis, perimuscular connective tissue, full layer, serosa,  
12 adjacent organ, or major vascular invasion<sup>7</sup>), liver invasion, number of nodes  
13 examined, positive lymph nodes, number of hilar nodes examined, positive hilar  
14 lymph nodes, region of positive nodes, region of nodes examined (with codes the  
15 same as those used for the region of lymphadenectomy in surgery), grade, histology  
16 type (using ICD-O-3 codes<sup>22</sup>), microvascular invasion, and perineural invasion.  
17 Tumours will be staged according to the AJCC 8<sup>th</sup> staging manual according to  
18 pathological reports derived from the aforementioned variables. Notably, the  
19 description of “invasion of full layer” for depth of invasion is not suggested in the  
20 AJCC 8<sup>th</sup> manual but is commonly used in China.  
21  
22  
23  
24  
25  
26  
27  
28  
29  
30  
31  
32  
33

### 34 **Laboratory examination**

35

36 Laboratory examination results for patients are collected with the date of  
37 examination. Indicators of interest include the following: (1) routine blood tests: white  
38 blood cell count, haemoglobin, and platelet count; (2) liver function tests: total  
39 bilirubin, direct bilirubin, albumin, alanine aminotransferase, aspartate  
40 aminotransferase, alkaline phosphatase, and gamma-glutamyl transferase; (3) renal  
41 function tests: blood urea nitrogen and creatine; (4) lipid indicators: triglycerides and  
42 total cholesterol; (5) inflammation indicators: C-reactive protein and lactic  
43 dehydrogenase; (6) coagulation indicators: international normalized ratio,  
44 prothrombin time, activated partial thromboplastin time, and fibrinogen; (7) tumour  
45 markers: carcinoembryonic antigen, carbohydrate antigen 19-9, carbohydrate antigen  
46 125, and alpha fetoprotein; and (8) other tests: blood type and hepatitis B test. The test  
47 method and normal range of each indicator may vary across hospitals. Thus, we first  
48  
49  
50  
51  
52  
53  
54  
55  
56  
57  
58  
59  
60

1  
2  
3  
4 uniform the units of each indicator according to the first enrolled hospital; then, based  
5  
6 on the first enrolled hospital, we normalize each result of laboratory examination by  
7  
8 its normal range across different hospitals.  
9

### 10 **Radiology reports**

11  
12 Radiological reports are collected with the date of examination. The following  
13  
14 indicators will be collected: the type of examination (ultrasound, computed tomography,  
15  
16 magnetic resonance imaging, and/or other types) and the conclusion of the examination  
17  
18 (inflammation, polyp, tumour, gallstone, and/or others).  
19

### 20 **Patient and public involvement**

21  
22  
23 Patients or the public involvement were not applied in the plans of this research.  
24

### 25 **ETHICS AND DISSEMINATION**

26  
27  
28 The protocol of the CRGGC has been approved by the Committee for Ethics of  
29  
30 Xinhua Hospital, Shanghai Jiao Tong University School of Medicine (SHEC-C-2019-  
31  
32 085) and registered in ClinicalTrials.gov (NCT04140552). All results of this study will  
33  
34 be published in peer-reviewed journals and presented at relevant conferences.  
35

### 36 **DISCUSSION**

37  
38  
39 The CRGGC study is a large multicentre registry cohort study to evaluate the  
40  
41 clinical presentation, treatment, and prognosis of GBC patients in China. The focus of  
42  
43 CRGGC is to 1) describe the status quo of treatment and survival of GBC patients in  
44  
45 China and 2) improve the standardized treatment of GBC.  
46

47  
48 Upon reviewing the published studies on GBC, we found a lack of large  
49  
50 observational studies on GBC in China focusing on its clinical features and prognosis.  
51  
52 Moreover, international studies on GBC were limited by small sample sizes and flawed  
53  
54 coding systems for GBC. Our data will establish a collaborative platform for GBC  
55  
56 research, providing valuable data from China.

57  
58 GBC is a relatively rare but lethal malignancy, making it important to address the  
59  
60

1  
2  
3  
4 standardization of its primary care, treatment, and post-treatment follow-up.  
5  
6 Researchers have shown unsatisfactory adherence to clinical guidelines. Radical  
7  
8 cholecystectomy was recommended for T1b GBC by the NCCN guidelines nearly 10  
9  
10 years ago; however, only 50% of T1b GBC patients in the U.S. received radical  
11  
12 cholecystectomy<sup>13</sup>. Bergquist et al.<sup>23</sup> reported that from 2004 to 2012, only 28.2% of  
13  
14 GBC patients with positive nodal disease received adjuvant chemotherapy in the  
15  
16 National Cancer Database of the U.S. even though this was the recommended  
17  
18 treatment in the NCCN guidelines. Knowing the current situation is essential for  
19  
20 future improvement; however, no data have been reported on GBC treatment in  
21  
22 China. Well-designed observational studies in China will help to point out weak  
23  
24 points in clinical practice and, at the same time, summarize valuable clinical  
25  
26 experience in the treatment of GBC and pave the way for further standardized  
27  
28 treatment.

29  
30 GBC cases in China account for nearly 1/4 of cases worldwide; thus, GBC poses  
31  
32 a significant disease burden in China. However, few clinical studies of the diagnosis  
33  
34 and treatment of GBC have been performed in China, making this significant  
35  
36 population underrepresented. By launching the CRGGC study, we also expect to  
37  
38 boost collaborations among Chinese researchers. We hope this collaboration could  
39  
40 induce further translational research and clinical trials in China, providing essential  
41  
42 evidence on GBC treatment.

43  
44 There are several limitations and potential biases in our study design. (1) The  
45  
46 retrospective nature is inevitably related to information bias and heterogeneity in the  
47  
48 data recording. This will cause difficulty in the standardization of data and a relatively  
49  
50 large proportion of missing data. To overcome such bias, we composed and continue  
51  
52 to update a codebook for standardization of each variable. Researchers responsible for  
53  
54 data entry are trained and qualified at the data centre. The missing data are analysed to  
55  
56 determine potential bias. (2) This is a retrospective study using convenience sampling.  
57  
58 Thus, the cohort may not be completely representative of GBC patients in China.  
59  
60

1  
2  
3  
4 However, we attempt to include centres in every province in China. Moreover, most  
5 cancer patients in China are treated in tertiary hospitals. (3) Biospecimens of the  
6 involved patients are not collected. Future collaboration on this issue will be  
7  
8 considered.  
9  
10  
11  
12  
13  
14  
15  
16  
17  
18  
19  
20  
21  
22  
23  
24  
25  
26  
27  
28  
29  
30  
31  
32  
33  
34  
35  
36  
37  
38  
39  
40  
41  
42  
43  
44  
45  
46  
47  
48  
49  
50  
51  
52  
53  
54  
55  
56  
57  
58  
59  
60

For peer review only

## Acknowledgements

We would like to thank Prof. Wenyi Yang at Shanghai General Hospital, China, and Prof. Jiong Li at Aarhus University, Denmark, for their valuable advice on the CRGGC registry. We thank our collaborators for their contributions to the CRGGC study, as follows: Prof. Lianxin Liu at Anhui Provincial Hospital, Prof. Xu Liu at Peking University Shenzhen Hospital, Prof. Yinmo Yang at Peking University First Hospital, Prof. Qiang Xu at Peking Union Medical College Hospital, Prof. Banghao Xu at The First Affiliated Hospital of Guangxi Medical University, Prof. Jianhua Liu at The Second Hospital of Hebei Medical University, Prof. Baobiing Yin at Huashan Hospital, Prof. Weilong Cai at Huzhou Central Hospital, Prof. Zhiping Zhang at Ningbo First Hospital, Prof. Xuting Zhi at Qilu Hospital of Shandong University, Prof. Longhua Rao at Central Hospital of Minhang District, Prof. Xiaoping Yang at Shanghai Pudong Hospital, Prof. Jiahua Yang at Putuo District People's Hospital of Shanghai, Prof. Ruiwu Dai at Chengdu Military General Hospital, Prof. Leida Zhang at Southwest Hospital, Prof. Xinbao Wang at Zhejiang Cancer Hospital, Prof. Jinhui Zhou at The Second Affiliated Hospital of Zhejiang University School of Medicine, Prof. Yongjun Chen at Ruijin Hospital, and Prof. Yongwei Sun at Renji Hospital. We would also like to thank the researchers who made significant contributions to the CRGGC registry, as follows: Prof. Min Wang at Tongji Hospital, Prof. Rongsheng Zhang at Shanxi Provincial Cancer Hospital, Dr. Kai Qu at The First Affiliated Hospital of Xi'an Jiaotong University, Prof. Lei Zou at The First Affiliated Hospital of Kunming Medical University, Prof. Fubao Liu at The First Affiliated Hospital of Anhui Medical University, Prof. Leibo Xu at Sun Yat-Sen Memorial Hospital, Sun Yat-Sen University, Prof. Xianhai Mao at People's Hospital of Hunan Province, Prof. Ling Zhang at Henan Cancer Hospital, Dr. Zhizhen Li at Eastern Hepatobiliary Surgery Hospital, and Dr. Lei Wang at Wuxi Second People's Hospital.

## Authors' Contributions

LYB is the principal investigator steering the CRGGC and collaboration with other

1  
2  
3  
4 centres. Tai Ren, Yongsheng Li, Xi Zhang wrote and revised the manuscript. Tai Ren,  
5  
6 Yongsheng Li, Yajun Geng, Ziyu Shao, Maolan Li, Xiangsong Wu, Xu-An Wang,  
7  
8 Wenguang Wu, Yijun Shu, Runfa Bao, Wei Gong, and Ping Dong discussed and  
9  
10 drafted the CRF, standard operation procedure in data collection and management,  
11  
12 and standard of quality control. Tai Ren and Yongsheng Li are responsible for study  
13  
14 management and coordination. All authors are responsible for data collection and  
15  
16 quality control in their hospitals. All authors reviewed the manuscript for intellectual  
17  
18 content and approved the final version of the report.

### 19 20 **Funding statement**

21  
22 This study was supported by the National Natural Science Foundation of China (No.  
23  
24 31620103910, 81874181, and 91940305), the Emerging Frontier Program of Hospital  
25  
26 Development Center (No. SHDC12018107), the Key Program of Shanghai Science  
27  
28 and Technology Commission (No. YDZX20193100004049), the Shanghai Key  
29  
30 Laboratory of Biliary Tract Disease Research Foundation (17DZ2260200), the  
31  
32 Shanghai Artificial Intelligence Innovation and Development Project (2019, Project of  
33  
34 Xinhua Hospital Affiliated to Shanghai Jiao Tong University School of Medicine), the  
35  
36 Multi-Center Clinical Research Project of Shanghai Jiao Tong University School of  
37  
38 Medicine (DLY201507) and the Translational Medicine Innovation Fund of Shanghai  
39  
40 Jiao Tong University School of Medicine (15ZH4003).

### 41 42 **Competing interests statement**

43  
44 All authors declare no competing interests.

### 45 46 **Word Count:**

47  
48  
49 3209 (from abstract to discussion)  
50  
51  
52  
53  
54  
55  
56  
57  
58  
59  
60



## References

1. Hundal R, Shaffer EA. Gallbladder cancer: epidemiology and outcome. *Clin Epidemiol* 2014;6:99-109. doi: 10.2147/CLEP.S37357 [published Online First: 2014/03/19]
2. Misra S, Chaturvedi A, Misra NC, et al. Carcinoma of the gallbladder. *The Lancet Oncology* 2003;4(3):167-76. doi: 10.1016/s1470-2045(03)01021-0
3. Li M, Zhang Z, Li X, et al. Whole-exome and targeted gene sequencing of gallbladder carcinoma identifies recurrent mutations in the ErbB pathway. *Nat Genet* 2014;46(8):872-6. doi: 10.1038/ng.3030 [published Online First: 2014/07/07]
4. Lindner P, Holmberg E, Hafstrom L. Gallbladder cancer - no improvement in survival over time in a Swedish population. *Acta Oncol* 2018;57(11):1482-89. doi: 10.1080/0284186X.2018.1478124 [published Online First: 2018/06/23]
5. Creasy JM, Goldman DA, Gonen M, et al. Evolution of surgical management of gallbladder carcinoma and impact on outcome: results from two decades at a single-institution. *HPB (Oxford)* 2019;21(11):1541-51. doi: 10.1016/j.hpb.2019.03.370 [published Online First: 2019/04/28]
6. NCCN Clinical Practice Guidelines in Oncology: Hepatobiliary Cancers, Version 4. 2019: National Comprehensive Cancer Network,; 2019 [2020-02-13]. Available from: [https://www.nccn.org/professionals/physician\\_gls/pdf/hepatobiliary.pdf](https://www.nccn.org/professionals/physician_gls/pdf/hepatobiliary.pdf).
7. American Joint Committee on Cancer. AJCC Cancer Staging Manual. 8th ed ed. New York: Springer 2017.

- 1  
2  
3  
4 8. Shindoh J, de Aretxabala X, Aloia TA, et al. Tumor location is a strong predictor of tumor  
5  
6 progression and survival in T2 gallbladder cancer: an international multicenter study.  
7  
8  
9 *Ann Surg* 2015;261(4):733-9. doi: 10.1097/SLA.0000000000000728 [published Online  
10  
11 First: 2014/05/24]  
12  
13  
14  
15 9. Amini N, Kim Y, Wilson A, et al. Prognostic Implications of Lymph Node Status for Patients  
16  
17 With Gallbladder Cancer: A Multi-Institutional Study. *Ann Surg Oncol* 2016;23(9):3016-  
18  
19 23. doi: 10.1245/s10434-016-5243-y [published Online First: 2016/05/07]  
20  
21  
22  
23 10. Ito H, Ito K, D'Angelica M, et al. Accurate staging for gallbladder cancer: implications for  
24  
25 surgical therapy and pathological assessment. *Ann Surg* 2011;254(2):320-5. doi:  
26  
27 10.1097/SLA.0b013e31822238d8 [published Online First: 2011/05/28]  
28  
29  
30  
31 11. Tuo J, Zhang M, Zheng R, et al. [Report of incidence and mortality of gallbladder cancer in  
32  
33 China, 2014]. *Chin J Oncol* 2018;40(12):894-99.  
34  
35  
36  
37 12. Bray F, Ferlay J, Soerjomataram I, et al. Global cancer statistics 2018: GLOBOCAN  
38  
39 estimates of incidence and mortality worldwide for 36 cancers in 185 countries. *CA*  
40  
41 *Cancer J Clin* 2018;68(6):394-424. doi: 10.3322/caac.21492 [published Online First:  
42  
43 2018/09/13]  
44  
45  
46  
47  
48 13. Vo E, Curley SA, Chai CY, et al. National Failure of Surgical Staging for T1b Gallbladder  
49  
50 Cancer. *Ann Surg Oncol* 2019;26(2):604-10. doi: 10.1245/s10434-018-7064-7  
51  
52 [published Online First: 2018/12/01]  
53  
54  
55  
56 14. Facility Oncology Registry Data System. 3rd ed, ed. Chicago, IL: American College of  
57  
58  
59  
60

- 1  
2  
3  
4 Surgeons 2002.  
5  
6  
7 15. Collaborative Stage Work Group of the American Joint Committee on Cancer. Collaborative  
8  
9 Stage Data Collection System User Documentation and Coding Instructions. version  
10  
11 02.04 ed. Chicago, IL: American Joint Committee on Cancer 2012.  
12  
13  
14  
15 16. Zou S, Zhang L. [Clinical epidemiologic characteristics of carcinoma of gallbladder in China].  
16  
17 *Chinese Journal of Practical Surgery* 2000;20(1):43-46.  
18  
19  
20  
21 17. Shen H, Song H, Wang L, et al. [Clinical feature of gallbladder cancer in Northwestern China:  
22  
23 a report of 2379 cases from 17 institutions]. *Chinese Journal of Surgery*  
24  
25 2015;53(10):747-51. doi: 10.3760/cma.j.issn.0529-5815.2015.10.007  
26  
27  
28  
29 18. Hsing AW, Gao Y-T, Devesa SS, et al. Rising incidence of biliary tract cancers in Shanghai,  
30  
31 China. *Int J Cancer* 1998;75:368-70.  
32  
33  
34  
35 19. Bao PP, Zheng Y, Wu CX, et al. Cancer incidence in urban Shanghai, 1973-2010: an  
36  
37 updated trend and age-period-cohort effects. *BMC Cancer* 2016;16:284. doi:  
38  
39 10.1186/s12885-016-2313-2 [published Online First: 2016/04/23]  
40  
41  
42  
43 20. Brierley JD, Gospodarowicz MK, Wittekind C. TNM Classification of Malignant Tumours,  
44  
45 8th ed: Wiley 2018.  
46  
47  
48  
49 21. Kishi Y, Shimada K, Hata S, et al. Definition of T3/4 and Regional Lymph Nodes in  
50  
51 Gallbladder Cancer: Which Is More Valid, the UICC or the Japanese Staging System?  
52  
53 *Annals of Surgical Oncology* 2012;19(11):3567-73. doi: 10.1245/s10434-012-2599-5  
54  
55  
56  
57 22. World Health Organization. International classification of diseases for oncology (ICD-O).  
58  
59  
60

1  
2  
3  
4 3rd ed ed. Geneva: World Health Organization 2013.  
5  
6

- 7 23. Bergquist JR, Shah HN, Habermann EB, et al. Adjuvant systemic therapy after resection of  
8  
9 node positive gallbladder cancer: Time for a well-designed trial? (Results of a US-  
10 national retrospective cohort study). *Int J Surg* 2018;52:171-79. doi:  
11  
12 10.1016/j.ijso.2018.02.052 [published Online First: 2018/03/03]  
13  
14  
15  
16  
17  
18  
19  
20  
21  
22  
23  
24  
25  
26  
27  
28  
29  
30  
31  
32  
33  
34  
35  
36  
37  
38  
39  
40  
41  
42  
43  
44  
45  
46  
47  
48  
49  
50  
51  
52  
53  
54  
55  
56  
57  
58  
59  
60

For peer review only

1  
2  
3  
4 **Figure legends**  
5

6 Fig. 1 Workflow of data collection and quality control in CRGGC.  
7  
8  
9  
10  
11  
12  
13  
14  
15  
16  
17  
18  
19  
20  
21  
22  
23  
24  
25  
26  
27  
28  
29  
30  
31  
32  
33  
34  
35  
36  
37  
38  
39  
40  
41  
42  
43  
44  
45  
46  
47  
48  
49  
50  
51  
52  
53  
54  
55  
56  
57  
58  
59  
60

For peer review only

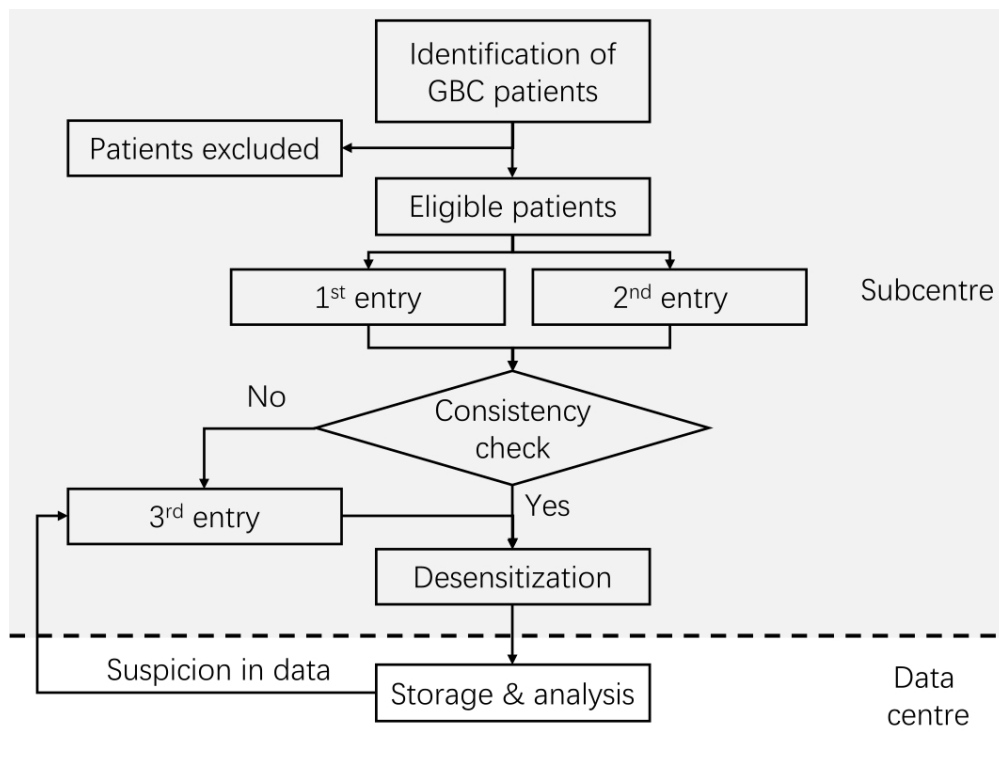

Fig. 1 Workflow of data collection and quality control in CRGGC.

1  
2  
3  
4  
5  
6  
7  
8  
9  
10  
11  
12  
13  
14  
15  
16  
17  
18  
19  
20  
21  
22  
23  
24  
25  
26  
27  
28  
29  
30  
31  
32  
33  
34  
35  
36  
37  
38  
39  
40  
41  
42  
43  
44  
45  
46

**Protocol for a national gallbladder cancer registry study in China: the Chinese Research Group of Gallbladder Cancer (CRGGC) study**

Tai Ren; Yongsheng Li, Xi Zhang, ... , Ying-Bin Liu, MD, FACS, on behalf of the CRGGC

**ONLINE SUPPLEMENTARY FILE 1**

List of collaborators in the Chinese Research Group of Gallbladder Cancer (CRGGC) study

| Province | Hospital                                                                                   | Principle investigator |
|----------|--------------------------------------------------------------------------------------------|------------------------|
| Shanghai | Xin Hua Hospital Affiliated to Shanghai Jiao Tong University School of Medicine            | Prof. Yingbin Liu      |
| Shanghai | Eastern Hepatobiliary Surgery Hospital                                                     | Prof. Xiaoqing Jiang   |
| Shanghai | Shanghai General Hospital                                                                  | Prof. Junmin Xu        |
| Shanghai | Zhongshan Hospital                                                                         | Prof. Houbao Liu       |
| Shanghai | Huashan Hospital                                                                           | Prof. Baobiing Yin     |
| Shanghai | Ruijin Hospital                                                                            | Prof. Yongjun Chen     |
| Shanghai | Renji Hospital                                                                             | Prof. Yongwei Sun      |
| Shanghai | Shanghai Fengxian District Central Hospital                                                | Prof. Xueli Zhang      |
| Shanghai | Shanghai Pudong Hospital                                                                   | Prof. Xiaoping Yang    |
| Shanghai | Central Hospital of Minhang District, Shanghai                                             | Prof. Longhua Rao      |
| Shanghai | Putuo District People's Hospital of Shanghai                                               | Prof. Jiahua Yang      |
| Shanghai | Xinhua (Chongming) Hospital Affiliated to Shanghai Jiao Tong University School of Medicine | Prof. Zhewei Fei       |
| Zhejiang | Sir Run Run Shaw Hospital                                                                  | Prof. Defei Hong       |
| Zhejiang | The Second Affiliated Hospital of Zhejiang University School of medicine                   | Prof. Jinhui Zhou      |

|          |                                                                                           |                     |
|----------|-------------------------------------------------------------------------------------------|---------------------|
| Zhejiang | Zhejiang Cancer Hospital                                                                  | Prof. Xinbao Wang   |
| Zhejiang | The First Affiliated Hospital of Wenzhou Medical University                               | Dr. Bo Yang         |
| Zhejiang | Shaoxing People's Hospital                                                                | Prof. Feng Tao      |
| Zhejiang | Shaoxing Second Hospital                                                                  | Prof. Zaiyang Zhang |
| Zhejiang | Yinzhou Hospital Affiliated to Medical School of Ningbo University                        | Prof. Kejun Hua     |
| Zhejiang | Huzhou Central Hospital                                                                   | Prof. Weilong Cai   |
| Zhejiang | Ningbo First Hospital                                                                     | Prof. Zhiping Zhang |
| Zhejiang | Taizhou Municipal Hospital                                                                | Prof. Chong Jin     |
| Jiangsu  | Nanjing Drum Tower Hospital, the Affiliated Hospital of Nanjing University Medical School | Prof. Yudong Qiu    |
| Jiangsu  | The Second Affiliated Hospital of Suzhou University                                       | Prof. Xiaoming Ma   |
| Jiangsu  | The Affiliated Hospital of Xuzhou Medical University                                      | Prof. Jian Hong     |
| Jiangsu  | Xuzhou Central Hospital                                                                   | Prof. Yuzhen Xu     |
| Jiangsu  | Wuxi Second People's Hospital                                                             | Prof. Huihan Jin    |
| Jiangsu  | Changshu No.1 People's Hospital                                                           | Prof. Jianfeng Gu   |
| Jiangsu  | Changzhou No.2 People's Hospital                                                          | Prof. Chunfu Zhu    |
| Jiangsu  | Affiliated Hospital of Nantong University                                                 | Prof. Peng Wang     |
| Jiangsu  | Nantong Tumor Hospital                                                                    | Prof. Hongyu Cai    |
| Jiangsu  | The First People's Hospital of Nantong                                                    | Prof. Hong Zang     |
| Jiangsu  | The First People's Hospital of Taicang                                                    | Prof. Yi Wang       |
| Jiangsu  | Xinghua City People's Hospital                                                            | Prof. Xiang Wang    |
| Beijing  | Peking Union Medical College Hospital                                                     | Prof. Qiang Xu      |
| Beijing  | Peking University First Hospital                                                          | Prof. Yinmo Yang    |
| Tianjin  | Tianjin Medical University Cancer Hospital                                                | Prof. Jihui Hao     |
| Hebei    | The Second Hospital of Hebei Medical University                                           | Prof. Jianhua Liu   |
| Henan    | Henan Cancer Hospital                                                                     | Prof. Yawei Hua     |



|                |                                                             |                      |
|----------------|-------------------------------------------------------------|----------------------|
| Henan          | The Fifth Affiliated Hospital of Zhengzhou University       | Prof. Xiaoyong Li    |
| Shandong       | Shandong Provincial Hospital                                | Prof. Jun Liu        |
| Shandong       | Qilu Hospital of Shandong University                        | Prof. Xuting Zhi     |
| Shandong       | The Affiliated Hospital of Qingdao University               | Prof. Jingyu Cao     |
| Shanxi         | Heping Hospital Affiliated to Changzhi Medical College      | Prof. Buqiang Wu     |
| Shanxi         | First Hospital of Shanxi Medical University                 | Prof. Jiansheng Liu  |
| Shanxi         | Shanxi Provincial Cancer Hospital                           | Prof. Xueyi Dang     |
| Inner Mongolia | Baotou City Central Hospital                                | Prof. Mingzhang Li   |
| Inner Mongolia | Tongliao City Hospital                                      | Prof. Xuedong Feng   |
| Heilongjiang   | The First Affiliated Hospital of Harbin Medical University  | Prof. Bei Sun        |
| Heilongjiang   | The Second Affiliated Hospital of Harbin Medical University | Prof. Yunfu Cui      |
| Heilongjiang   | Harbin Medical University Cancer Hospital                   | Prof. Bing Li        |
| Jilin          | The First Bethune Hospital of Jilin University              | Prof. Chuanlei Wang  |
| Jilin          | The Second Hospital of Jilin University                     | Prof. Xuewen Zhang   |
| Jilin          | China-Japan Union Hospital of Jilin University              | Prof. Hong Cao       |
| Liaoning       | Shengjing Hospital of China Medical University              | Prof. Chaoliu Dai    |
| Hubei          | Tongji Hospital                                             | Prof. Renyi Qin      |
| Hunan          | People's Hospital of Hunan Province                         | Prof. Changjun Liu   |
| Anhui          | The First Affiliated Hospital of Anhui Medical University   | Prof. Yeben Qian     |
| Anhui          | Anhui Provincial Hospital                                   | Prof. Lianxin Liu    |
| Anhui          | The First Affiliated Hospital of Bengbu Medical College     | Prof. Jianguang Jia  |
| Jiangxi        | The Second Affiliated Hospital of Nanchang University       | Prof. Lu Fang        |
| Jiangxi        | The First Affiliated Hospital of Nanchang University        | Prof. Linhui Zheng   |
| Jiangxi        | Jiangxi Provincial People's Hospital                        | Prof. Xiaoliang Chen |
| Jiangxi        | Jiangxi Cancer Hospital                                     | Prof. Qiyun Li       |

|    |           |                                                              |                     |
|----|-----------|--------------------------------------------------------------|---------------------|
| 1  |           |                                                              |                     |
| 2  |           |                                                              |                     |
| 3  |           |                                                              |                     |
| 4  |           |                                                              |                     |
| 5  | Shaanxi   | The First Affiliated Hospital of Xi'an Jiaotong University   | Prof. Chang Liu     |
| 6  | Shaanxi   | Xijing Hospital                                              | Prof. Lin Wang      |
| 7  |           |                                                              |                     |
| 8  | Gansu     | The First Hospital of Lanzhou University                     | Prof. Xun Li        |
| 9  | Qinghai   | Qinghai Provincial People's Hospital                         | Prof. Haihong Zhu   |
| 10 | Xinjiang  | The First Affiliated Hospital of Xinjiang Medical University | Prof. Wei Han       |
| 11 |           |                                                              |                     |
| 12 | Chongqing | Southwest Hospital                                           | Prof. Leida Zhang   |
| 13 | Sichuan   | Chengdu Military General Hospital                            | Prof. Ruiwu Dai     |
| 14 | Yunnan    | The First Affiliated Hospital of Kunming Medical University  | Prof. Kunhua Wang   |
| 15 |           |                                                              |                     |
| 16 | Fujian    | Fujian Provincial Hospital                                   | Prof. Maolin Yan    |
| 17 | Guangdong | Sun Yat-Sen Memorial Hospital, Sun Yat-Sen University        | Prof. Chao Liu      |
| 18 | Guangdong | Peking University Shenzhen Hospital                          | Prof. Xu Liu        |
| 19 |           |                                                              |                     |
| 20 | Guangxi   | The First Affiliated Hospital of Guangxi Medical University  | Prof. Banghao Xu    |
| 21 | Hainan    | Hainan Provincial People's Hospital                          | Prof. Jinfang Zheng |
| 22 |           |                                                              |                     |
| 23 |           |                                                              |                     |
| 24 |           |                                                              |                     |
| 25 |           |                                                              |                     |
| 26 |           |                                                              |                     |
| 27 |           |                                                              |                     |
| 28 |           |                                                              |                     |
| 29 |           |                                                              |                     |
| 30 |           |                                                              |                     |
| 31 |           |                                                              |                     |
| 32 |           |                                                              |                     |
| 33 |           |                                                              |                     |
| 34 |           |                                                              |                     |
| 35 |           |                                                              |                     |
| 36 |           |                                                              |                     |
| 37 |           |                                                              |                     |
| 38 |           |                                                              |                     |
| 39 |           |                                                              |                     |
| 40 |           |                                                              |                     |
| 41 |           |                                                              |                     |
| 42 |           |                                                              |                     |
| 43 |           |                                                              |                     |
| 44 |           |                                                              |                     |
| 45 |           |                                                              |                     |
| 46 |           |                                                              |                     |

**STROBE checklist of cohort studies**

|                              | <b>Item No</b> | <b>Recommendation</b>                                                                                                                                                                                                                                                                                                                                                                                                                                                                     | <b>Page Number</b> |
|------------------------------|----------------|-------------------------------------------------------------------------------------------------------------------------------------------------------------------------------------------------------------------------------------------------------------------------------------------------------------------------------------------------------------------------------------------------------------------------------------------------------------------------------------------|--------------------|
| <b>Title and abstract</b>    | 1              | (a) Indicate the study's design with a commonly used term in the title or the abstract                                                                                                                                                                                                                                                                                                                                                                                                    | 6                  |
|                              |                | (b) Provide in the abstract an informative and balanced summary of what was done and what was found                                                                                                                                                                                                                                                                                                                                                                                       | 6                  |
| <b>Introduction</b>          |                |                                                                                                                                                                                                                                                                                                                                                                                                                                                                                           |                    |
| Background/rationale         | 2              | Explain the scientific background and rationale for the investigation being reported                                                                                                                                                                                                                                                                                                                                                                                                      | 8                  |
| Objectives                   | 3              | State specific objectives, including any prespecified hypotheses                                                                                                                                                                                                                                                                                                                                                                                                                          | 9                  |
| <b>Methods</b>               |                |                                                                                                                                                                                                                                                                                                                                                                                                                                                                                           |                    |
| Study design                 | 4              | Present key elements of study design early in the paper                                                                                                                                                                                                                                                                                                                                                                                                                                   | 9                  |
| Setting                      | 5              | Describe the setting, locations, and relevant dates, including periods of recruitment, exposure, follow-up, and data collection <ul style="list-style-type: none"> <li>• Setting: hospitals in different regions in China</li> <li>• Locations: eTable 1;</li> <li>• Period of recruitment: from 1st January 2009, to 31st August 2018</li> <li>• Follow-up: the last follow-up date was 10<sup>th</sup> Oct 2019</li> <li>• Data collection: from September 2018 to June 2019</li> </ul> | 10-11              |
| Participants                 | 6              | (a) Give the eligibility criteria, and the sources and methods of selection of participants. Describe methods of follow-up                                                                                                                                                                                                                                                                                                                                                                | 10                 |
|                              |                | (b) For matched studies, give matching criteria and number of exposed and unexposed                                                                                                                                                                                                                                                                                                                                                                                                       | NA                 |
| Variables                    | 7              | Clearly define all outcomes, exposures, predictors, potential confounders, and effect modifiers. Give diagnostic criteria, if applicable                                                                                                                                                                                                                                                                                                                                                  | 10-15              |
| Data sources/<br>measurement | 8*             | For each <b>variable of interest</b> , give sources of data and details of methods of assessment (measurement). Describe <b>comparability of assessment</b> methods if there is more than one group                                                                                                                                                                                                                                                                                       | 10-15              |
| Bias                         | 9              | Describe <b>any efforts to address potential sources of bias</b>                                                                                                                                                                                                                                                                                                                                                                                                                          | 16                 |
| Study size                   | 10             | Explain how the <b>study size</b> was arrived at                                                                                                                                                                                                                                                                                                                                                                                                                                          | 10                 |
| Quantitative variables       | 11             | Explain how quantitative variables were handled in the analyses. If applicable, describe which groupings were chosen and why                                                                                                                                                                                                                                                                                                                                                              | NA                 |

|                     |     |                                                                                                                                                                                                              |    |
|---------------------|-----|--------------------------------------------------------------------------------------------------------------------------------------------------------------------------------------------------------------|----|
| Statistical methods | 12  | (a) Describe <b>all statistical methods</b> , including those used to control for confounding                                                                                                                | NA |
|                     |     | (b) Describe any methods used to <b>examine subgroups and interactions</b>                                                                                                                                   | NA |
|                     |     | (c) Explain how <b>missing data</b> were addressed                                                                                                                                                           | NA |
|                     |     | (d) If applicable, explain how <b>loss to follow-up</b> was addressed                                                                                                                                        | NA |
|                     |     | (e) Describe any <b>sensitivity analyses</b>                                                                                                                                                                 | NA |
| <b>Results</b>      |     |                                                                                                                                                                                                              |    |
| Participants        | 13* | (a) Report numbers of individuals at each stage of study—eg numbers potentially eligible, examined for eligibility, confirmed eligible, included in the study, completing follow-up, and analysed            | NA |
|                     |     | (b) Give reasons for non-participation at each stage                                                                                                                                                         | NA |
|                     |     | (c) Consider use of a flow diagram                                                                                                                                                                           | NA |
| Descriptive data    | 14* | (a) Give characteristics of study participants (eg demographic, clinical, social) and information on exposures and potential confounders                                                                     | NA |
|                     |     | (b) Indicate number of participants with missing data for each variable of interest                                                                                                                          | NA |
|                     |     | (c) Summarise follow-up time (eg, average and total amount)                                                                                                                                                  | NA |
| Outcome data        | 15* | Report numbers of outcome events or summary measures over time                                                                                                                                               | NA |
| Main results        | 16  | (a) Give unadjusted estimates and, if applicable, confounder-adjusted estimates and their precision (eg, 95% confidence interval). Make clear which confounders were adjusted for and why they were included | NA |
|                     |     | (b) Report category boundaries when continuous variables were categorized                                                                                                                                    | NA |
|                     |     | (c) If relevant, consider translating estimates of relative risk into absolute risk for a meaningful time period                                                                                             | NA |
| Other analyses      | 17  | Report other analyses done—eg analyses of subgroups and interactions, and sensitivity analyses                                                                                                               | NA |
| <b>Discussion</b>   |     |                                                                                                                                                                                                              |    |
| Key results         | 18  | Summarise key results with reference to study objectives                                                                                                                                                     | NA |
| Limitations         | 19  | Discuss limitations of the study, taking into account sources of potential bias or imprecision. Discuss both direction and magnitude of any potential bias                                                   | 16 |
| Interpretation      | 20  | Give a cautious overall interpretation of results considering objectives, limitations, multiplicity of                                                                                                       | NA |

1  
2  
3  
4  
5  
6  
7  
8  
9  
10  
11  
12  
13  
14  
15  
16  
17  
18  
19  
20  
21  
22  
23  
24  
25  
26  
27  
28  
29  
30  
31  
32  
33  
34  
35  
36  
37  
38  
39  
40  
41  
42  
43  
44  
45  
46  
47  
48  
49  
50  
51  
52  
53  
54  
55  
56  
57  
58  
59  
60

|                          |    |                                                                                                                                                               |    |
|--------------------------|----|---------------------------------------------------------------------------------------------------------------------------------------------------------------|----|
|                          |    | analyses, results from similar studies, and other relevant evidence                                                                                           |    |
| Generalisability         | 21 | Discuss the generalisability (external validity) of the study results                                                                                         | NA |
| <b>Other information</b> |    |                                                                                                                                                               |    |
| Funding                  | 22 | Give the source of funding and the role of the funders for the present study and, if applicable, for the original study on which the present article is based | 18 |

For peer review only

# BMJ Open

## Protocol for a gallbladder cancer registry study in China: the Chinese Research Group of Gallbladder Cancer (CRGGC) study

|                               |                                                                                                                                                                                                                                                                                                                                                                                                                                                                                                                                                                                                                                                                                                                                                                                                                                                                                                                                                                                                                                                                                                                                                                                                                                                                                                                                                                                                                                                                                                                                                                                                                                                                                                                                                                                                                                                                                                                                                                                                                                                                                                                                                                                                                                                                                                                                                                                                                                                                                                                                                 |
|-------------------------------|-------------------------------------------------------------------------------------------------------------------------------------------------------------------------------------------------------------------------------------------------------------------------------------------------------------------------------------------------------------------------------------------------------------------------------------------------------------------------------------------------------------------------------------------------------------------------------------------------------------------------------------------------------------------------------------------------------------------------------------------------------------------------------------------------------------------------------------------------------------------------------------------------------------------------------------------------------------------------------------------------------------------------------------------------------------------------------------------------------------------------------------------------------------------------------------------------------------------------------------------------------------------------------------------------------------------------------------------------------------------------------------------------------------------------------------------------------------------------------------------------------------------------------------------------------------------------------------------------------------------------------------------------------------------------------------------------------------------------------------------------------------------------------------------------------------------------------------------------------------------------------------------------------------------------------------------------------------------------------------------------------------------------------------------------------------------------------------------------------------------------------------------------------------------------------------------------------------------------------------------------------------------------------------------------------------------------------------------------------------------------------------------------------------------------------------------------------------------------------------------------------------------------------------------------|
| Journal:                      | <i>BMJ Open</i>                                                                                                                                                                                                                                                                                                                                                                                                                                                                                                                                                                                                                                                                                                                                                                                                                                                                                                                                                                                                                                                                                                                                                                                                                                                                                                                                                                                                                                                                                                                                                                                                                                                                                                                                                                                                                                                                                                                                                                                                                                                                                                                                                                                                                                                                                                                                                                                                                                                                                                                                 |
| Manuscript ID                 | bmjopen-2020-038634.R1                                                                                                                                                                                                                                                                                                                                                                                                                                                                                                                                                                                                                                                                                                                                                                                                                                                                                                                                                                                                                                                                                                                                                                                                                                                                                                                                                                                                                                                                                                                                                                                                                                                                                                                                                                                                                                                                                                                                                                                                                                                                                                                                                                                                                                                                                                                                                                                                                                                                                                                          |
| Article Type:                 | Protocol                                                                                                                                                                                                                                                                                                                                                                                                                                                                                                                                                                                                                                                                                                                                                                                                                                                                                                                                                                                                                                                                                                                                                                                                                                                                                                                                                                                                                                                                                                                                                                                                                                                                                                                                                                                                                                                                                                                                                                                                                                                                                                                                                                                                                                                                                                                                                                                                                                                                                                                                        |
| Date Submitted by the Author: | 22-Oct-2020                                                                                                                                                                                                                                                                                                                                                                                                                                                                                                                                                                                                                                                                                                                                                                                                                                                                                                                                                                                                                                                                                                                                                                                                                                                                                                                                                                                                                                                                                                                                                                                                                                                                                                                                                                                                                                                                                                                                                                                                                                                                                                                                                                                                                                                                                                                                                                                                                                                                                                                                     |
| Complete List of Authors:     | <p>Ren, Tai; Xinhua Hospital Affiliated to Shanghai Jiaotong University School of Medicine, Department of General Surgery; Shanghai Key Laboratory of Biliary Tract Disease Research</p> <p>Li, Yongsheng; Xinhua Hospital Affiliated to Shanghai Jiaotong University School of Medicine, Department of General Surgery; Shanghai Key Laboratory of Biliary Tract Disease Research</p> <p>Zhang, Xi; Xinhua Hospital Affiliated to Shanghai Jiaotong University School of Medicine, Clinical Research Unit</p> <p>Geng, Yajun; Xinhua Hospital Affiliated to Shanghai Jiaotong University School of Medicine, Department of General Surgery; Shanghai Key Laboratory of Biliary Tract Disease Research</p> <p>Shao, Ziyu; Xinhua Hospital Affiliated to Shanghai Jiaotong University School of Medicine, Department of General Surgery; Shanghai Key Laboratory of Biliary Tract Disease Research</p> <p>Li, Maolan; Xinhua Hospital Affiliated to Shanghai Jiaotong University School of Medicine, Department of General Surgery; Shanghai Key Laboratory of Biliary Tract Disease Research</p> <p>Wu, Xiangsong; Xinhua Hospital Affiliated to Shanghai Jiaotong University School of Medicine, Department of General Surgery; Shanghai Key Laboratory of Biliary Tract Disease Research</p> <p>Wang, Xu-An; Xinhua Hospital Affiliated to Shanghai Jiaotong University School of Medicine, Department of General Surgery; Shanghai Key Laboratory of Biliary Tract Disease Research</p> <p>Liu, Fatao; Shanghai Key Laboratory of Biliary Tract Disease Research</p> <p>Wu, Wenguang; Xinhua Hospital Affiliated to Shanghai Jiaotong University School of Medicine, Department of General Surgery; Shanghai Key Laboratory of Biliary Tract Disease Research</p> <p>Shu, Yijun; Xinhua Hospital Affiliated to Shanghai Jiaotong University School of Medicine, Department of General Surgery; Shanghai Key Laboratory of Biliary Tract Disease Research</p> <p>Bao, Runfa; Xinhua Hospital Affiliated to Shanghai Jiaotong University School of Medicine, Department of General Surgery; Shanghai Key Laboratory of Biliary Tract Disease Research</p> <p>Gong, Wei; Xinhua Hospital Affiliated to Shanghai Jiaotong University School of Medicine, Department of General Surgery; Shanghai Key Laboratory of Biliary Tract Disease Research</p> <p>Dong, Ping; Xinhua Hospital Affiliated to Shanghai Jiaotong University School of Medicine, Department of General Surgery; Shanghai Key Laboratory of Biliary Tract Disease Research</p> |

1  
2  
3  
4  
5  
6  
7  
8  
9  
10  
11  
12  
13  
14  
15  
16  
17  
18  
19  
20  
21  
22  
23  
24  
25  
26  
27  
28  
29  
30  
31  
32  
33  
34  
35  
36  
37  
38  
39  
40  
41  
42  
43  
44  
45  
46  
47  
48  
49  
50  
51  
52  
53  
54  
55  
56  
57  
58  
59  
60

|                                                                                                                                                |
|------------------------------------------------------------------------------------------------------------------------------------------------|
| Dang, Xueyi; Shanxi Provincial Cancer Hospital, Department of General Surgery                                                                  |
| Liu, Chang; Xi'an Jiaotong University Medical College First Affiliated Hospital, Department of Hepatobiliary Surgery                           |
| Liu, Changjun; Hunan Provincial People's Hospital, Department of Hepatobiliary Surgery                                                         |
| Sun, Bei ; First Affiliated Hospital of Harbin Medical University, Department of HPB Surgery                                                   |
| Liu, Jun; Shandong Provincial Hospital, Department of Hepatobiliary Surgery                                                                    |
| Wang, Lin; Xijing Hospital, Department of Hepatobiliary Surgery                                                                                |
| Hong, Defei; Zhejiang University School of Medicine Sir Run Run Shaw Hospital, Department of HPB Surgery                                       |
| Qin, Renyi; Tongji Hospital of Tongji Medical College of Huazhong University of Science and Technology, Department of Pancreatobiliary Surgery |
| Jiang, Xiaoqing; Eastern Hepatobiliary Surgery Hospital, Department of Biliary Surgery                                                         |
| Zhang, Xuewen; Jilin University Second Hospital, Department of HPB Surgery                                                                     |
| Xu, Junmin; Shanghai No1 People's Hospital, Department of General Surgery                                                                      |
| Jia, Jianguang; First Affiliated Hospital of Bengbu Medical College, Department of Surgical Oncology                                           |
| Yang, Bo; Wenzhou Medical University First Affiliated Hospital, Department of General Surgery                                                  |
| Li, Bing; Tumor Hospital of Harbin Medical University, Department of HPB Surgery                                                               |
| Dai, Chaoliu; Shengjing Hospital of China Medical University, Department of Hepatobiliary Surgery                                              |
| Cao, Jingyu; The Affiliated Hospital of Qingdao University, Department of HPB Surgery                                                          |
| Cao, Hong; China-Japan Union Hospital of Jilin University, Department of GI Surgery                                                            |
| Tao, Feng; Shaoxing People's Hospital, Department of GI Surgery                                                                                |
| Zhang, Zaiyang; Shaoxing Second Hospital, Department of General Surgery                                                                        |
| Wang, Yi; First Peoples of Hospital of Taicang, Department of GI Surgery                                                                       |
| Jin, Huihan; Wuxi Second People's Hospital, Department of Hepatobiliary Surgery                                                                |
| Cai, Hongyu; Nantong Tumor Hospital, Department of Hepatobiliary Surgery                                                                       |
| Fei, Zhewei; Shanghai Jiaotong University School of Medicine Xinhua Hospital Chongming Branch, Department of General Surgery                   |
| Gu, Jianfeng; Changshu No. 1 People's Hospital, Department of General Surgery                                                                  |
| Han, Wei; Xinjiang Medical University Affiliated First Hospital, Department of Pancreatic Surgery                                              |
| Feng, Xuedong; Tongliao City Hospital, Department of General Surgery                                                                           |
| Fang, Lu; Nanchang University Second Affiliated Hospital, Department of Hepatobiliary Surgery                                                  |
| Zheng, Linhui; First Affiliated Hospital of Nanchang University, Department of General Surgery                                                 |
| Zhu, Chunfu; Changzhou No. 2 People's Hospital, Department of HPB Surgery                                                                      |
| Wang, Kunhua; Kunming Medical University First Affiliated Hospital, Department of General Surgery                                              |
| Zhang, Xueli; Shanghai Fengxian Central Hospital, Department of General Surgery                                                                |
| Li, Xiaoyong; The Fifth Affiliated Hospital of Zhengzhou University, Department of HPB Surgery                                                 |

|                                 |                                                                                                                                                                                                                                                                                                                                                                                                                                                                                                                                                                                                                                                                                                                                                                                                                                                                                                                                                                                                                                                                                                                                                                                                                                                                                                                                                                                                                                                                                                                                                                                                                                                                                                                                                                                                                                                                                                                                                                                                                                                                                                                                                                                                                                                                                                                                                                                                                                                                                                                               |
|---------------------------------|-------------------------------------------------------------------------------------------------------------------------------------------------------------------------------------------------------------------------------------------------------------------------------------------------------------------------------------------------------------------------------------------------------------------------------------------------------------------------------------------------------------------------------------------------------------------------------------------------------------------------------------------------------------------------------------------------------------------------------------------------------------------------------------------------------------------------------------------------------------------------------------------------------------------------------------------------------------------------------------------------------------------------------------------------------------------------------------------------------------------------------------------------------------------------------------------------------------------------------------------------------------------------------------------------------------------------------------------------------------------------------------------------------------------------------------------------------------------------------------------------------------------------------------------------------------------------------------------------------------------------------------------------------------------------------------------------------------------------------------------------------------------------------------------------------------------------------------------------------------------------------------------------------------------------------------------------------------------------------------------------------------------------------------------------------------------------------------------------------------------------------------------------------------------------------------------------------------------------------------------------------------------------------------------------------------------------------------------------------------------------------------------------------------------------------------------------------------------------------------------------------------------------------|
|                                 | <p>Jin, Chong; Taizhou Hospital of Zhejiang Province, Department of General Surgery</p> <p>Qian, Yeben; First Affiliated Hospital of Anhui Medical University, Department of HPB Surgery</p> <p>Cui, Yunfu; Second Affiliated Hospital of Harbin Medical University, Department of Pancreatobiliary Surgery</p> <p>Xu, Yuzhen; Xuzhou Municipal Fourth People's Hospital, Department of GI Surgery</p> <p>Wang, Xiang; Xinghua City People's Hospital, Department of HPB Surgery</p> <p>Liu, Houbao; Zhong Shan Hospital, Department of General Surgery</p> <p>Hua, Yawei; Henan Cancer Hospital, Department of General Surgery</p> <p>Liu, Chao; Sun Yat-Sen Memorial Hospital, Department of Pancreatobiliary Surgery</p> <p>Hao, Jihui; Tianjin Medical University Cancer Institute and Hospital, Department of Pancreatic Surgery</p> <p>Wang, Chuanlei; Jilin University First Hospital, Department of HPB Surgery</p> <p>Li, Qiyun; Jiangxi Cancer Hospital, Department of Abdominal Surgery</p> <p>Li, Xun; Lanzhou University First Affiliated Hospital, Department of General Surgery</p> <p>Liu, Jiansheng; First Hospital of Shanxi Medical University, Department of General Surgery</p> <p>Li, Mingzhang; Baotou City Central Hospital, Department of General Surgery</p> <p>Qiu, Yudong; Nanjing Drum Tower Hospital, Department of Pancreatobiliary Surgery</p> <p>Wu, Buqiang; Changzhi Medical College Affiliated Heping Hospital, Department of General Surgery</p> <p>Zheng, Jinfang; Hainan Provincial People's Hospital, Department of General Surgery</p> <p>Chen, Xiaoliang; Jiangxi Provincial People's Hospital, Department of Hepatobiliary Surgery</p> <p>Zhu, Haihong; Qinghai Provincial People's Hospital, Department of General Surgery</p> <p>Hua, Kejun; Yinzhou People's Hospital, Department of General Surgery</p> <p>Yan, Maolin; Fujian Provincial Hospital, Department of Hepatobiliary Surgery</p> <p>Wang, Peng; Nantong University Affiliated Hospital, Department of HPB Surgery</p> <p>Zang, Hong; The First People's Hospital of Nantong, Department of Hepatobiliary Surgery</p> <p>Ma, Xiaoming; Second Affiliated Hospital of Soochow University, Department of General Surgery</p> <p>Hong, Jian; Xuzhou Medical College Affiliated Hospital, Department of General Surgery</p> <p>Liu, Yingbin; Xinhua Hospital Affiliated to Shanghai Jiaotong University School of Medicine, Department of General Surgery; Shanghai Key Laboratory of Biliary Tract Disease Research</p> |
| <b>Primary Subject Heading</b>: | Gastroenterology and hepatology                                                                                                                                                                                                                                                                                                                                                                                                                                                                                                                                                                                                                                                                                                                                                                                                                                                                                                                                                                                                                                                                                                                                                                                                                                                                                                                                                                                                                                                                                                                                                                                                                                                                                                                                                                                                                                                                                                                                                                                                                                                                                                                                                                                                                                                                                                                                                                                                                                                                                               |
| Secondary Subject Heading:      | Oncology, Epidemiology, Surgery                                                                                                                                                                                                                                                                                                                                                                                                                                                                                                                                                                                                                                                                                                                                                                                                                                                                                                                                                                                                                                                                                                                                                                                                                                                                                                                                                                                                                                                                                                                                                                                                                                                                                                                                                                                                                                                                                                                                                                                                                                                                                                                                                                                                                                                                                                                                                                                                                                                                                               |
| Keywords:                       | ONCOLOGY, Hepatobiliary disease < GASTROENTEROLOGY, SURGERY                                                                                                                                                                                                                                                                                                                                                                                                                                                                                                                                                                                                                                                                                                                                                                                                                                                                                                                                                                                                                                                                                                                                                                                                                                                                                                                                                                                                                                                                                                                                                                                                                                                                                                                                                                                                                                                                                                                                                                                                                                                                                                                                                                                                                                                                                                                                                                                                                                                                   |
|                                 |                                                                                                                                                                                                                                                                                                                                                                                                                                                                                                                                                                                                                                                                                                                                                                                                                                                                                                                                                                                                                                                                                                                                                                                                                                                                                                                                                                                                                                                                                                                                                                                                                                                                                                                                                                                                                                                                                                                                                                                                                                                                                                                                                                                                                                                                                                                                                                                                                                                                                                                               |



1  
2  
3  
4  
5  
6  
7  
8  
9  
10  
11  
12  
13  
14  
15  
16  
17  
18  
19  
20  
21  
22  
23  
24  
25  
26  
27  
28  
29  
30  
31  
32  
33  
34  
35  
36  
37  
38  
39  
40  
41  
42  
43  
44  
45  
46  
47  
48  
49  
50  
51  
52  
53  
54  
55  
56  
57  
58  
59  
60

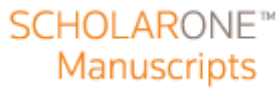



I, the Submitting Author has the right to grant and does grant on behalf of all authors of the Work (as defined in the below author licence), an exclusive licence and/or a non-exclusive licence for contributions from authors who are: i) UK Crown employees; ii) where BMJ has agreed a CC-BY licence shall apply, and/or iii) in accordance with the terms applicable for US Federal Government officers or employees acting as part of their official duties; on a worldwide, perpetual, irrevocable, royalty-free basis to BMJ Publishing Group Ltd ("BMJ") its licensees and where the relevant Journal is co-owned by BMJ to the co-owners of the Journal, to publish the Work in this journal and any other BMJ products and to exploit all rights, as set out in our [licence](#).

The Submitting Author accepts and understands that any supply made under these terms is made by BMJ to the Submitting Author unless you are acting as an employee on behalf of your employer or a postgraduate student of an affiliated institution which is paying any applicable article publishing charge ("APC") for Open Access articles. Where the Submitting Author wishes to make the Work available on an Open Access basis (and intends to pay the relevant APC), the terms of reuse of such Open Access shall be governed by a Creative Commons licence – details of these licences and which [Creative Commons](#) licence will apply to this Work are set out in our licence referred to above.

Other than as permitted in any relevant BMJ Author's Self Archiving Policies, I confirm this Work has not been accepted for publication elsewhere, is not being considered for publication elsewhere and does not duplicate material already published. I confirm all authors consent to publication of this Work and authorise the granting of this licence.

1  
2  
3  
4 **Protocol for a gallbladder cancer registry study in China: the Chinese Research**  
5 **Group of Gallbladder Cancer (CRGGC) study**  
6  
7  
8  
9

10 Tai Ren<sup>#,1,2,3</sup>; Yongsheng Li<sup>#,1,2</sup>, Xi Zhang<sup>#,4</sup>, Yajun Geng<sup>1,2</sup>, Ziyu Shao<sup>1,2</sup>, Maolan  
11 Li<sup>1,2</sup>, Xiangsong Wu<sup>1,2</sup>, Xu-An Wang<sup>1,2</sup>, Fatao Liu<sup>2,3</sup>, Wenguang Wu<sup>1,2</sup>, Yijun Shu<sup>1,2</sup>,  
12 Runfa Bao<sup>1,2</sup>, Wei Gong<sup>1,2</sup>, Ping Dong<sup>1,2</sup>, Xueyi Dang<sup>5</sup>, Chang Liu<sup>6</sup>, Changjun Liu<sup>7</sup>,  
13 Bei Sun<sup>8</sup>, Jun Liu<sup>9</sup>, Lin Wang<sup>10</sup>, Defei Hong<sup>11</sup>, Renyi Qin<sup>12</sup>, Xiaoqing Jiang<sup>13</sup>,  
14 Xuewen Zhang<sup>14</sup>, Junmin Xu<sup>15</sup>, Jianguang Jia<sup>16</sup>, Bo Yang<sup>17</sup>, Bing Li<sup>18</sup>, Chaoliu Dai<sup>19</sup>,  
15 Jingyu Cao<sup>20</sup>, Hong Cao<sup>21</sup>, Feng Tao<sup>22</sup>, Zaiyang Zhang<sup>23</sup>, Yi Wang<sup>24</sup>, Huihan Jin<sup>25</sup>,  
16 Hongyu Cai<sup>26</sup>, Zhewei Fei<sup>27</sup>, Jianfeng Gu<sup>28</sup>, Wei Han<sup>29</sup>, Xuedong Feng<sup>30</sup>, Lu Fang<sup>31</sup>,  
17 Linhui Zheng<sup>32</sup>, Chunfu Zhu<sup>33</sup>, Kunhua Wang<sup>34</sup>, Xueli Zhang<sup>35</sup>, Xiaoyong Li<sup>36</sup>,  
18 Chong Jin<sup>37</sup>, Yeben Qian<sup>38</sup>, Yunfu Cui<sup>39</sup>, Yuzhen Xu<sup>40</sup>, Xiang Wang<sup>41</sup>, Houbao Liu<sup>42</sup>,  
19 Yawei Hua<sup>43</sup>, Chao Liu<sup>44</sup>, Jihui Hao<sup>45</sup>, Chuanlei Wang<sup>46</sup>, Qiyun Li<sup>47</sup>, Xun Li<sup>48</sup>,  
20 Jiansheng Liu<sup>49</sup>, Mingzhang Li<sup>50</sup>, Yudong Qiu<sup>51</sup>, Buqiang Wu<sup>52</sup>, Jinfang Zheng<sup>53</sup>,  
21 Xiaoliang Chen<sup>54</sup>, Haihong Zhu<sup>55</sup>, Kejun Hua<sup>56</sup>, Maolin Yan<sup>57</sup>, Peng Wang<sup>58</sup>, Hong  
22 Zang<sup>59</sup>, Xiaoming Ma<sup>60</sup>, Jian Hong<sup>61</sup>, Ying-Bin Liu, MD, FACS<sup>1,2,3</sup>, on behalf of the  
23 CRGGC  
24  
25  
26  
27  
28  
29  
30  
31  
32  
33  
34  
35  
36  
37  
38  
39  
40

41 #These authors contributed equally to this work.  
42

43 <sup>1</sup> Department of General Surgery, Xinhua Hospital, Shanghai Jiao Tong University  
44 School of Medicine, Shanghai, China.  
45

46 <sup>2</sup> Shanghai Key Laboratory of Biliary Tract Disease Research, Shanghai, China.  
47

48 <sup>3</sup> State Key Laboratory for Oncogenes and Related Genes, Shanghai, China  
49

50 <sup>4</sup> Clinical Research Unit, Xinhua Hospital Affiliated to Shanghai Jiao Tong  
51 University, School of Medicine, Shanghai, China.  
52

53 <sup>5</sup> Department of General Surgery, Shanxi Provincial Cancer Hospital, Shanxi  
54  
55  
56  
57  
58  
59  
60

1  
2  
3  
4 <sup>6</sup> Department of Hepatobiliary Surgery, The First Affiliated Hospital of Xi'an Jiaotong  
5 University, Shaanxi  
6

7 <sup>7</sup> Department of Hepatobiliary Surgery, People's Hospital of Hunan Province, Hunan  
8  
9

10 <sup>8</sup> Department of HPB Surgery, The First Affiliated Hospital of Harbin Medical  
11 University, Heilongjiang  
12  
13

14 <sup>9</sup> Department of Hepatobiliary Surgery, Shangdong Provincial Hospital, Shandong  
15  
16

17 <sup>10</sup> Department of Hepatobiliary Surgery, Xijing Hospital, Shaanxi  
18  
19

20 <sup>11</sup> Department of HPB Surgery, Sir Run Run Shaw Hospital, Zhejiang  
21  
22

23 <sup>12</sup> Department of Pancreatobiliary Surgery, Tongji Hospital, Hubei  
24  
25

26 <sup>13</sup> Department of Biliary Surgery, Eastern Hepatobiliary Surgery Hospital, Shanghai  
27  
28

29 <sup>14</sup> Department of HPB Surgery, The Second Hospital of Jilin University, Jilin  
30  
31

32 <sup>15</sup> Department of General Surgery, Shanghai General Hospital, Shanghai  
33  
34

35 <sup>16</sup> Department of Surgical Oncology, The First Affiliated Hospital of Bengbu Medical  
36 College, Anhui  
37  
38

39 <sup>17</sup> Department of General Surgery, The First Affiliated Hospital of Wenzhou Medical  
40 University, Zhejiang  
41  
42

43 <sup>18</sup> Department of HPB Surgery, Harbin Medical University Cancer Hospital,  
44 Heilongjiang  
45  
46

47 <sup>19</sup> Department of Hepatobiliary Surgery, Shengjing Hospital of China Medical  
48 University, Liaoning  
49  
50

51 <sup>20</sup> Department of HPB Surgery, The Affiliated Hospital of Qingdao University,  
52 Shandong  
53  
54

55 <sup>21</sup> Department of GI Surgery, China-Japan Union Hospital of Jilin University, Jilin  
56  
57

58 <sup>22</sup> Department of GI Surgery, Shaoxing People's Hospital, Zhejiang  
59  
60

- 1  
2  
3  
4 23 Department of General Surgery, Shaoxing Second Hospital, Zhejiang  
5  
6 24 Department of GI Surgery, The First People's Hospital of Taicang, Jiangsu  
7  
8 25 Department of Hepatobiliary Surgery, Wuxi Second People's Hospital, Jiangsu  
9  
10  
11 26 Department of Hepatobiliary Surgery, Nantong Tumor Hospital, Jiangsu  
12  
13 27 Department of General Surgery, Xinhua (Chongming) Hospital Affiliated to  
14  
15 Shanghai Jiao Tong University School of Medicine, Shanghai  
16  
17 28 Department of General Surgery, Changshu No. 1 People's Hospital, Jiangsu  
18  
19 29 Department of Pancreatic Surgery, The First Affiliated Hospital of Xinjiang  
20  
21 Medical University, Xinjiang  
22  
23  
24 30 Department of General Surgery, Tongliao City Hospital, Inner Mongolia  
25  
26  
27 31 Department of Hepatobiliary Surgery, The Second Affiliated Hospital of Nanchang  
28  
29 University, Jiangxi  
30  
31 32 Department of General Surgery, The First Affiliated Hospital of Nanchang  
32  
33 University, Jiangxi  
34  
35  
36 33 Department of HPB Surgery, Changzhou No. 2 People's Hospital, Jiangsu  
37  
38 34 Department of General Surgery, The First Affiliated Hospital of Kunming Medical  
39  
40 University, Yunnan  
41  
42  
43 35 Department of General Surgery, Shanghai Fengxian District Central Hospital,  
44  
45 Shanghai  
46  
47 36 Department of HPB Surgery, The Fifth Affiliated Hospital of Zhengzhou  
48  
49 University, Henan  
50  
51  
52 37 Department of General Surgery, Taizhou Municipal Hospital, Zhejiang  
53  
54 38 Department of HPB Surgery, The First Affiliated Hospital of Anhui Medical  
55  
56 University, Anhui  
57  
58 39 Department of Pancreatobiliary Surgery, The Second Affiliated Hospital of Harbin  
59  
60

1  
2  
3  
4 Medical University, Heilongjiang  
5

6 <sup>40</sup> Department of GI Surgery, Xuzhou Central Hospital, Jiangsu  
7

8 <sup>41</sup> Department of HPB Surgery, Xinghua City People's Hospital, Jiangsu  
9

10 <sup>42</sup> Department of General Surgery, Zhongshan Hospital, Shanghai  
11  
12

13 <sup>43</sup> Department of General Surgery, Henan Cancer Hospital, Henan  
14

15 <sup>44</sup> Department of Pancreatobiliary Surgery, Sun Yat-Sen Memorial Hospital, Sun Yat-  
16  
17 Sen University, Guangdong  
18

19 <sup>45</sup> Department of Pancreatic Surgery, Tianjin Medical University Cancer Hospital,  
20  
21 Tianjin  
22  
23

24 <sup>46</sup> Department of HPB Surgery, The First Bethune Hospital of Jilin University, Jilin  
25  
26

27 <sup>47</sup> Department of Abdominal Surgery, Jiangxi Cancer Hospital, Jiangxi  
28

29 <sup>48</sup> Department of General Surgery, The First Hospital of Lanzhou University, Gansu  
30  
31

32 <sup>49</sup> Department of General Surgery, First Hospital of Shanxi Medical University,  
33  
34 Shanxi  
35

36 <sup>50</sup> Department of General Surgery, Baotou City Central Hospital, Inner Mongolia  
37  
38

39 <sup>51</sup> Department of Pancreatobiliary Surgery, Nanjing Drum Tower Hospital, the  
40  
41 Affiliated Hospital of Nanjing University Medical School, Jiangsu  
42

43 <sup>52</sup> Department of General Surgery, Heping Hospital Affiliated to Changzhi Medical  
44  
45 College, Shanxi  
46

47 <sup>53</sup> Department of General Surgery, Hainan Provincial People's Hospital, Hainan  
48  
49

50 <sup>54</sup> Department of Hepatobiliary Surgery, Jiangxi Provincial People's Hospital, Jiangxi  
51

52 <sup>55</sup> Department of General Surgery, Qinghai Provincial People's Hospital, Qinghai  
53  
54

55 <sup>56</sup> Department of General Surgery, Yinzhou Hospital Affiliated to the Medical School  
56  
57 of Ningbo University, Zhejiang  
58  
59  
60

1  
2  
3  
4 <sup>57</sup> Department of Hepatobiliary Surgery, Fujian Provincial Hospital, Fujian

5  
6 <sup>58</sup> Department of HPB Surgery, Affiliated Hospital of Nantong University, Jiangsu

7  
8  
9 <sup>59</sup> Department of Hepatobiliary Surgery, The First People's Hospital of Nantong,  
10 Jiangsu

11  
12  
13 <sup>60</sup> Department of General Surgery, The Second Affiliated Hospital of Suzhou  
14 University, Jiangsu

15  
16  
17 <sup>61</sup> Department of General Surgery, The Affiliated Hospital of Xuzhou Medical  
18 University, Jiangsu  
19

20  
21  
22  
23  
24 **Corresponding Authors:**

25  
26 **Ying-Bin Liu**, Ph.D., M.D., FACS,

27  
28  
29 Department of General Surgery, Xinhua Hospital, Shanghai Jiao Tong University  
30 School of Medicine

31  
32  
33 Address: No. 1665 Kongjiang Road, Shanghai, 200092, China.

34  
35  
36 E-mail: [liuyingbin@xinquamed.com.cn](mailto:liuyingbin@xinquamed.com.cn)

37  
38  
39  
40 **Keywords:** gallbladder cancer, cohort study, China, clinical epidemiology, tumour  
41 staging  
42  
43  
44  
45  
46  
47  
48  
49  
50  
51  
52  
53  
54  
55  
56  
57  
58  
59  
60

## 1 **Abstract**

## 2 **Introduction**

3 Gallbladder cancer (GBC), the sixth most common gastrointestinal tract cancer and  
4 poses a significant disease burden in China. However, no national representative data  
5 are available on the clinical characteristics, treatment, and prognosis of GBC in the  
6 Chinese population.

## 7 **Methods and analysis**

8 The Chinese Research Group of Gallbladder Cancer (CRGGC) study is a multicentre  
9 retrospective registry cohort study. Clinically diagnosed GBC patients are identified  
10 from January 1, 2008, to December 31, 2019, by reviewing the electronic medical  
11 records (EMRs) from 76 tertiary and secondary hospitals across 28 provinces in  
12 China. Patients with pathological and radiological diagnoses of malignancy, including  
13 cancer in situ, from the gallbladder and cystic duct are eligible, according to the  
14 National Comprehensive Cancer Network (NCCN) 2019 guidelines. Patients are  
15 excluded if GBC is the secondary diagnosis in the discharge summary. The  
16 demographic characteristics, medical history, physical examination results, surgery  
17 information, pathological data, laboratory examination results, and radiology reports  
18 are collected in a standardized case report form. By May 2021, approximately 6,000  
19 GBC patients will be included. The clinical follow-up data will be updated until 5  
20 years after the last admission for GBC of each patient.

21 The study aimed (1) to depict the clinical characteristics, including demographics,  
22 pathology, treatment, and prognosis of GBC patients in China; (2) to evaluate the  
23 adherence to clinical guidelines of GBC; and (3) to improve clinical practice for  
24 diagnosing and treating GBC and provide references for policy makers.

## 25 **Ethics and dissemination**

26 The protocol of the CRGGC has been approved by the Committee for Ethics of  
27 Xinhua Hospital, Shanghai Jiao Tong University School of Medicine (SHEC-C-2019-



1  
2  
3  
4 28 085) and registered in ClinicalTrials.gov (NCT04140552). All results of this study  
5  
6 29 will be published in peer-reviewed journals and presented at relevant conferences.  
7

8 30 **Study registration number:** NCT04140552  
9

10 31 **Strengths and limitations of this study**  
11

- 12  
13 32 1. The Chinese Research Group of Gallbladder Cancer (CRGGC) study is the first  
14  
15 33 large-scale registry cohort study of gallbladder cancer (GBC) in China, covering  
16  
17 34 76 tertiary and secondary hospitals across 28 provinces.  
18  
19 35 2. A standardized quality control and data management plan was designed to ensure  
20  
21 36 the accuracy and reliability of the data.  
22  
23 37 3. The EMR systems are not consistent across hospitals, which may introduce  
24  
25 38 variance in data recording and result in difficulty in systematic data formatting  
26  
27 39 and integration.  
28  
29 40 4. This is a retrospective study using convenience sampling. The study population  
30  
31 41 may not be completely representative of GBC patients in China.  
32  
33 42 5. There is a lack of biospecimens from involved patients.  
34  
35  
36  
37  
38  
39  
40  
41  
42  
43  
44  
45  
46  
47  
48  
49  
50  
51  
52  
53  
54  
55  
56  
57  
58  
59  
60

## 44 INTRODUCTION

45 Gallbladder cancer (GBC) is the most common type of biliary tract cancer<sup>1-3</sup> and  
46 one of the most lethal malignancies, with a 5-year survival rate of 5-15%<sup>1 4 5</sup>. Much  
47 effort has been made to optimize the treatment of GBC; however, the prognosis  
48 remains dismal<sup>4 6</sup>, and the quality of current evidence for GBC is still far from perfect.  
49 Due to its relatively low incidence, clinical trials on GBC are difficult to conduct.  
50 Most recommendations and guidelines for GBC from the National Comprehensive  
51 Cancer Network (NCCN; 2019 version 4) and American Joint Committee on Cancer  
52 (AJCC; 8<sup>th</sup> version) were derived from evidence of moderate quality<sup>7 8</sup>. Most of these  
53 studies were single-centre studies with limited sample sizes and generally no more  
54 than 300 cases<sup>9-11</sup>, which might introduce systematic bias into the conclusion.

55 On the other hand, common-used coding systems addressed little on GBC. The  
56 nomenclature of GBC in the literature is inconsistent. GBC defined by the AJCC 8<sup>th</sup>  
57 staging manual is a primary cancer in the gallbladder and cystic duct (C23.9 and part  
58 of C24.0; ICD-O-3 codes)<sup>8</sup>. However, many epidemiological studies refer to “GBC”  
59 as “GBC and extrahepatic cholangiocarcinoma (ECC; C23.9 and C24.0)”, leading to  
60 confusion in its incidence, mortality, and other epidemiological features<sup>12 13</sup>. In  
61 addition, cystic duct cancer is undistinguishable from ECC in most cancer registry  
62 studies, which means that this specific subset of patients is likely to be omitted<sup>14</sup>.  
63 Moreover, a commonly used coding system for surgery, the Facility Oncology  
64 Registry Data System, classifies GBC as “all other sites”, making it unlikely to define  
65 the extent of surgery and distinguish patients who undergo re-resection after GBC is  
66 incidentally found<sup>15</sup>. Regarding regional lymph nodes, the Collaborative Stage  
67 (version 0204) system defines celiac, superior mesenteric, and para-aortic lymph  
68 nodes as regional nodes, which is not consistent with either the AJCC 7<sup>th</sup> or AJCC 8<sup>th</sup>  
69 definition<sup>16</sup>. The coding problems in both patient identification and site-specific  
70 variables might lead to less stringent interpretation of the conclusions.

1  
2  
3  
4 71 China is a high-GBC risk country, but little evidence has been based on the  
5  
6 72 Chinese population<sup>12</sup>. Data from GLOBOCAN show that, taking GBC and ECC  
7  
8 73 together, the number of annual new cases in China accounts for 24.7% of new cases  
9  
10 74 worldwide<sup>13</sup>. Currently, the largest retrospective study of GBC in China was  
11  
12 75 conducted by Zou *et al.*<sup>17</sup>, including 3,922 patients from 116 hospitals in 28 provinces  
13  
14 76 of China during 1986-1998. This study described the demographic characteristics of  
15  
16 77 GBC in China, without further data on detailed staging, treatment, and prognosis  
17  
18 78 information. Another study of 2,379 GBC patients from 5 northwestern provinces  
19  
20 79 during 2009-2013<sup>18</sup> reported that 55.1% of GBC patients had advanced-stage  
21  
22 80 tumours. Other reports were mainly single-centre studies with limited sample sizes<sup>19</sup>  
23  
24 81 <sup>20</sup>. The critical characteristics in the diagnosis, treatment, and prognosis of GBC in  
25  
26 82 China are unknown.

27  
28  
29 83 Therefore, this study aimed to design a GBC cohort, the Chinese Research Group  
30  
31 84 of Gallbladder Cancer (CRGGC) study, (1) to comprehensively evaluate the clinical  
32  
33 85 characteristics, including demographics, pathology, treatment, and prognosis of GBC  
34  
35 86 patients in China; (2) to evaluate adherence to clinical guidelines of GBC; and (3) to  
36  
37 87 improve clinical practice and guidelines for GBC and provide references for policy  
38  
39 88 makers.

## 40 41 89 **METHODS AND ANALYSIS**

### 42 43 44 90 **Registry design**

45  
46 91 The CRGGC study is a multicentre retrospective registry cohort study. The  
47  
48 92 project was launched by the Shanghai Key Laboratory of Biliary Tract Disease  
49  
50 93 Research, with collaborators from 76 tertiary and secondary hospitals across 28  
51  
52 94 provinces in China (until March 8, 2020; see online supplementary file 1). We review  
53  
54 95 the electronic medical records (EMRs) of all diagnosed GBC patients from January 1,  
55  
56 96 2008, to December 31, 2019, and extract the related clinical and treatment  
57  
58 97 information. The clinical follow-up data will be updated until 5 years after the last  
59  
60

1  
2  
3  
4 98 admission for GBC of each patient.  
5

### 6 99 **Patient enrolment** 7

8  
9 100 Patients are identified with various search strategies: (1) ICD-10 code equals  
10 101 C23.9, or C24.0 with “cystic duct”; (2) discharge diagnosis includes “gallbladder  
11 102 cancer” (search strategy in Chinese: (“胆囊”) AND (“癌” OR “恶性肿瘤” OR “占  
12 103 位”), which means “gallbladder”/“cystic duct” AND (“cancer” OR “malignancy” OR  
13 104 “space-occupying lesion”)); and (3) pathological reports include “gallbladder cancer”.  
14  
15  
16  
17  
18  
19 105 All 3 search strategies are applied in each centre. The results are merged for  
20 106 subsequent exclusion. These search strategies were designed to be redundant because  
21 107 some search strategies may not be applicable in specific EMR systems and in specific  
22 108 periods.  
23  
24  
25  
26  
27

28 109 All identified admissions to the hospital are manually filtered according to the  
29 110 diagnostic criteria of the NCCN 2019 version 4 guidelines for hepatobiliary cancer<sup>7</sup>.  
30 111 Patients with a pathological or radiological diagnosis of malignancy, including cancer  
31 112 in situ, from the gallbladder and cystic duct are eligible. Patients are excluded if GBC  
32 113 is the secondary diagnosis in the discharge summary because patients admitted for  
33 114 other diseases are likely to have obscure cancer traits.  
34  
35  
36  
37  
38  
39  
40

41 115 The study includes patients diagnosed before December, 31, 2019. According to  
42 116 our preliminary estimation, more than 6,000 cases will meet our inclusion criteria. We  
43 117 expect to finish data collection by May 2021. After finishing enrolment of a short-  
44 118 term target of 2,000 cases, a primary analysis will be performed. The follow-up will  
45 119 be updated until 5 years after the admission of each patient. More centres are expected  
46 120 to participate in the CRGGC study; thus, the collaborator list may be expanded.  
47  
48  
49  
50  
51  
52  
53

### 54 121 **Clinical outcomes and follow-up** 55

56 122 The main outcome is the 5-year overall survival (OS) rate. OS is defined as the  
57 123 duration between the date of first diagnosis and the date of death or date of last  
58  
59  
60

1  
2  
3  
4 124 follow-up, where event other than death was defined as censor. We will also include  
5  
6 125 the following outcomes: progression-free survival (PFS), defined as the duration  
7  
8 126 between the date of first diagnosis and the date of recurrence; cancer-specific survival  
9  
10 127 (CSS), defined as the duration between the date of first diagnosis and the date of  
11  
12 128 cancer-caused death or date of last follow-up, where other events was defined as  
13  
14 129 censor; 3-year OS rate; and 90-day mortality (for patients who undergo surgery),  
15  
16 130 which will be used to indicate perioperative mortality. Clinical follow-up is defined as  
17  
18 131 the routine practice of hospitals of collecting patient data on treatment, tumour  
19  
20 132 recurrence and patient survival, either by outpatient/inpatient records or telephone.  
21  
22 133 We require hospitals to equip such a system and at least one follow-up per year to join  
23  
24 134 our collaboration. Based on these data, we update patients' follow-up statuses every  
25  
26 135 12 months. The data being collected from clinical follow-up include date of  
27  
28 136 recurrence, date of death, date of last contact, whether re-resection was performed if  
29  
30 137 the malignancy was found incidentally, and whether the patient received adjuvant  
31  
32 138 therapy.

### 33 34 35 139 **Data collection**

36  
37 140 The workflow of data collection and quality control is shown in Fig. 1. Before  
38  
39 141 data collection, a group of hepatobiliary specialists designed a structured case report  
40  
41 142 form, aiming to delineate features of GBC patients and answer corresponding clinical  
42  
43 143 questions. The case report form includes the following information: demographic  
44  
45 144 characteristics, medical history, physical examination results, surgery information,  
46  
47 145 pathological data, laboratory examination results, and radiology reports. We compiled  
48  
49 146 a codebook to standardize the definition of each variable. The data centre is  
50  
51 147 responsible for training doctors to collect data. Data collection is carried out by using  
52  
53 148 EpiData (v4.6.0.2, EpiData Association, Denmark).

54  
55  
56 149 Automated logic checks are applied to prevent out-of-range values. Duplicated  
57  
58 150 entry is required. If any discrepancies are found, a third specialist will be brought in  
59  
60

1  
2  
3  
4 151 for discussion and make a final decision.

5  
6 152 After data entry and quality control in each centre, the data are anonymized and  
7  
8 153 transferred to the servers in the data centre. The data centre is located at Shanghai Key  
9  
10 154 Laboratory of Biliary Tract Disease Research, which is equipped with data servers  
11  
12 155 and essential firewall and backup systems. The data centre is responsible for quality  
13  
14 156 assessment, storage, sharing, and analysis of the data. A group of researchers in the  
15  
16 157 data centre manage the database.

17  
18  
19 158 The data manager assesses the quality of the data after transfer to the data centre.  
20  
21 159 The assessment is based on the structure of missing data and a comparison to baseline  
22  
23 160 data. First, we apply a grading system, where variables are classified into essential,  
24  
25 161 important, and normal importance. Based on the proportion of missing values in each  
26  
27 162 category, the entries are graded as level A, B, C, or D in quality. Entries of category D  
28  
29 163 quality are normally excluded from analysis. Second, outliers and inconsistent data  
30  
31 164 are identified. Third, we compare baseline characteristics of the new data to previous  
32  
33 165 data, with indicators including sex ratio, mean age, proportion of TNM stage, and 5-  
34  
35 166 year OS. We apply the chi-square test, t-test, and log-rank test between the two  
36  
37 167 datasets. When a significant difference is found, the data manager analyses and  
38  
39 168 records suspicious data. The data manager inquires about the data in question with the  
40  
41 169 data source and asks for confirmation. The desensitized data are accessible to  
42  
43 170 collaborators after the completion of the database. A research proposal to the CRGGC  
44  
45 171 Scientific Committee is essential for analysis of the data.

## 46 47 48 172 **Demographic data and medical history**

49  
50 173 The EMR data for each patient are collected for every hospital visit from January  
51  
52 174 1, 2008. The baseline data are retrieved, including the following aspects: (1)  
53  
54 175 demographics: age at diagnosis, sex, race, and date of diagnosis; (2) medical history:  
55  
56 176 emergency operation, chief complaint, endoscopic retrograde cannulation of the  
57  
58 177 pancreas (ERCP) performed within 30 days before surgery, percutaneous transhepatic  
59  
60

1  
2  
3  
4 178 cholangial drainage (PTCD) performed within 30 days before surgery, neoadjuvant  
5  
6 179 therapy, and method of diagnosis (pathology, radiology, or other); (3) past medical  
7  
8 180 history: history of gallstone, history of gallbladder polyps, history of other  
9  
10 181 malignancies, hypertension, diabetes mellitus, and other comorbidities; (4) social and  
11  
12 182 personal history: marital status, smoking history, and use of alcohol; and (5) other  
13  
14 183 aspects: weight, height, family history, and total expenditure.

#### 16 184 **Surgery information**

- 19 185 1. The preoperative and intraoperative diagnoses are recorded. A diagnosis of  
20  
21 186 “gallbladder cancer”, “gallbladder tumour”, or “space-occupying lesion in  
22  
23 187 gallbladder” is regarded as the detection of malignancy.
- 25 188 2. Regional lymphadenectomy requires the resection of hilar nodes<sup>8</sup>. Further  
26  
27 189 clearance of lymph nodes is classified as extended lymphadenectomy.
- 30 190 3. The extent of lymphadenectomy includes the cystic duct, common bile duct,  
31  
32 191 portal vein, hepatic artery, common hepatic artery, post-superior pancreatic,  
33  
34 192 celiac, superior mesenteric, suprapyloric, left gastric artery, and paraaortic lymph  
35  
36 193 nodes<sup>8 21 22</sup>.
- 38 194 4. Combined hepatectomy is classified as no hepatectomy, liver wedge  
39  
40 195 resection/partial hepatectomy, IVb+V segmentectomy, hemihepatectomy, extent  
41  
42 196 more than hemihepatectomy, radiofrequency ablation, and hepatectomy for other  
43  
44 197 reasons.
- 46 198 5. If the malignancy is diagnosed after surgery, further treatment information may  
47  
48 199 not be available (the patient may turn to a second hospital for re-resection).  
49  
50 200 Patients in this case are categorized as “simple cholecystectomy performed;  
51  
52 201 further treatment not available”. If re-resection is available, its operative reports  
53  
54 202 will be reviewed as previously mentioned.
- 56 203 6. ERCP, PTCD, and transarterial chemoembolization (TACE) are not defined as

1  
2  
3  
4 204 surgery but as supportive treatment.

5  
6 205 7. Palliative surgery is defined as resection of the primary tumour, reconstruction of  
7  
8 206 the digestive tract, or both when there is evidence of distant metastasis or  
9  
10 207 unresectable tumour.

11  
12  
13 208 Other surgery-related variables include date of surgery, laparoscopic surgery,  
14  
15 209 combined bile duct resection, tumour positioned on the hepatic or peritoneal side,  
16  
17 210 perivascular invasion, perforation, porcelain gallbladder, duration of surgery,  
18  
19 211 intraoperative blood loss, and American Society of Anesthesiologists (ASA) score.

## 20 21 22 **Pathological data**

23  
24 213 Pathological data are recorded, including size of the tumour (in 3 dimensions),  
25  
26 214 resection margin, tumour positioned on the hepatic or peritoneal side, tumour  
27  
28 215 positioned on the fundus, body, neck, or cystic duct, depth of invasion (carcinoma in  
29  
30 216 situ or lamina propria, muscularis, perimuscular connective tissue, full layer, serosa,  
31  
32 217 adjacent organ, or major vascular invasion<sup>8</sup>), liver invasion, number of nodes  
33  
34 218 examined, positive lymph nodes, number of hilar nodes examined, positive hilar  
35  
36 219 lymph nodes, region of positive nodes, region of nodes examined (with codes the  
37  
38 220 same as those used for the region of lymphadenectomy in surgery), grade, histology  
39  
40 221 type (using ICD-O-3 codes<sup>23</sup>), microvascular invasion, and perineural invasion.  
41  
42 222 Tumours will be staged according to the AJCC 8<sup>th</sup> staging manual according to  
43  
44 223 pathological reports derived from the aforementioned variables. Notably, the  
45  
46 224 description of “invasion of full layer” for depth of invasion is not suggested in the  
47  
48 225 AJCC 8<sup>th</sup> manual but is commonly used in China.

## 49 50 51 **Laboratory examination**

52  
53 227 Laboratory examination results for patients are collected with the date of  
54  
55 228 examination. Indicators of interest include the following: (1) routine blood tests: white  
56  
57 229 blood cell count, haemoglobin, and platelet count; (2) liver function tests: total



1  
2  
3  
4 230 bilirubin, direct bilirubin, albumin, alanine aminotransferase, aspartate  
5  
6 231 aminotransferase, alkaline phosphatase, and gamma-glutamyl transferase; (3) renal  
7  
8 232 function tests: blood urea nitrogen and creatine; (4) lipid indicators: triglycerides and  
9  
10 233 total cholesterol; (5) inflammation indicators: C-reactive protein and lactic  
11  
12 234 dehydrogenase; (6) coagulation indicators: international normalized ratio,  
13  
14 235 prothrombin time, activated partial thromboplastin time, and fibrinogen; (7) tumour  
15  
16 236 markers: carcinoembryonic antigen, carbohydrate antigen 19-9, carbohydrate antigen  
17  
18 237 125, and alpha fetoprotein; and (8) other tests: blood type and hepatitis B test. The test  
19  
20 238 method and normal range of each indicator may vary across hospitals. Thus, we first  
21  
22 239 uniform the units of each indicator according to the first enrolled hospital; then, based  
23  
24 240 on the first enrolled hospital, we normalize each result of laboratory examination by  
25  
26 241 its normal range across different hospitals.

## 242 **Radiology reports**

243 Radiological reports are collected with the date of examination. The following  
244 indicators will be collected: the type of examination (ultrasound, computed tomography,  
245 magnetic resonance imaging, and/or other types) and the conclusion of the examination  
246 (inflammation, polyp, tumour, gallstone, and/or others).

## 247 **Statistical analysis**

248 The continuous variables will be described visually by histogram and summarized  
249 as mean±standard deviation or median (interquartile range), for normal- and skewed-  
250 distributed values. The discrete variables will be summarized as frequency (percentage).  
251 The proportion of missing data will be described, and an indicator of missing will be  
252 deployed for analysis. Differences with a two-sided  $P<0.05$  were considered as  
253 statistically significant.

254 We will calculate the average number of GBC diagnosed per year in each hospital,  
255 because the volume for cancer patients showed impact on patients' characteristics,

1  
2  
3  
4 256 treatment modalities, and prognosis<sup>24</sup>. The distribution of hospitals' average GBC  
5  
6 257 patients per year will be described in bar plot; 1 to 2 cut-off points will be determined  
7  
8 258 by inspecting the pattern to classify hospitals into low- and high-volume. Correlation  
9  
10 259 between hospital volume and patients' characteristics will be shown by either Pearson's  
11  
12 260 R, Spearman's  $\rho$ , or  $\chi^2$ , whichever appropriate. Potential correlated variables includes  
13  
14 261 (but not limited to) sex, age at diagnosis, TNM stage, gallstone, surgery type, and  
15  
16 262 adjuvant therapy.

17  
18  
19 263 Time trends for age, sex, TNM stage, surgery type, adjuvant therapy, and diagnosis  
20  
21 264 time will be shown by scatter plot fitted by linear or locally estimated scatterplot  
22  
23 265 smoothing, whichever appropriate.

24  
25  
26 266 The median survival time and loss to follow-up rate will be described. The Kaplan-  
27  
28 267 Meier method will be applied to assess the survival of patients, stratified by TNM stage  
29  
30 268 and by whether surgery performed. Cox proportional hazards regression will be applied  
31  
32 269 to evaluate predictors of prognosis, including (but not limited to) age, sex, T stage, N  
33  
34 270 stage, M stage, adjuvant therapy, extent of resection, gallstone, resection margin,  
35  
36 271 histological grade, perineural invasion, and microvascular invasion.

37  
38  
39 272 As proposed in both NCCN and Chinese Medical Association guidelines<sup>7 25</sup>, GBC  
40  
41 273 more advance than T1b requires resection of liver bed and regional lymphadenectomy.  
42  
43 274 Moreover, patients with nodal metastasis are recommended to take chemotherapy.  
44  
45 275 These three indicators will be described to evaluate the adherence to clinical guidelines  
46  
47 276 of GBC. Also, their significance in prognosis will be tested by survival analysis.

#### 48 49 277 **Patient and public involvement**

50  
51 278 Patients or the public involvement were not applied in the plans of this research.

#### 52 53 279 **ETHICS AND DISSEMINATION**

54  
55  
56 280 The protocol of the CRGGC has been approved by the Committee for Ethics of  
57  
58 281 Xinhua Hospital, Shanghai Jiao Tong University School of Medicine (SHEC-C-2019-  
59  
60

1  
2  
3  
4 282 085) and registered in ClinicalTrials.gov (NCT04140552). All results of this study will  
5  
6 283 be published in peer-reviewed journals and presented at relevant conferences.  
7

## 8 284 **DISCUSSION**

9  
10 285 The CRGGC study is a large multicentre registry cohort study to evaluate the  
11  
12 286 clinical presentation, treatment, and prognosis of GBC patients in China. The focus of  
13  
14 287 CRGGC is to 1) describe the status quo of treatment and survival of GBC patients in  
15  
16 288 China and 2) improve the standardized treatment of GBC.  
17

18  
19 289 Upon reviewing the published studies on GBC, we found a lack of large  
20  
21 290 observational studies on GBC in China focusing on its clinical features and prognosis.  
22  
23 291 Moreover, international studies on GBC were limited by small sample sizes and flawed  
24  
25 292 coding systems for GBC. Our data will establish a collaborative platform for GBC  
26  
27 293 research, providing valuable data from China.  
28

29  
30 294 GBC is a relatively rare but lethal malignancy, making it important to address the  
31  
32 295 standardization of its primary care, treatment, and post-treatment follow-up.  
33  
34 296 Researchers have shown unsatisfactory adherence to clinical guidelines. Radical  
35  
36 297 cholecystectomy was recommended for T1b GBC by the NCCN guidelines nearly 10  
37  
38 298 years ago; however, only 50% of T1b GBC patients in the U.S. received radical  
39  
40 299 cholecystectomy<sup>14</sup>. Bergquist et al.<sup>26</sup> reported that from 2004 to 2012, only 28.2% of  
41  
42 300 GBC patients with positive nodal disease received adjuvant chemotherapy in the  
43  
44 301 National Cancer Database of the U.S. even though this was the recommended  
45  
46 302 treatment in the NCCN guidelines. Knowing the current situation is essential for  
47  
48 303 future improvement; however, no data have been reported on GBC treatment in  
49  
50 304 China. Well-designed observational studies in China will help to point out weak  
51  
52 305 points in clinical practice and, at the same time, summarize valuable clinical  
53  
54 306 experience in the treatment of GBC and pave the way for further standardized  
55  
56 307 treatment.  
57  
58  
59  
60

1  
2  
3  
4 308 GBC cases in China account for nearly 1/4 of cases worldwide; thus, GBC poses  
5  
6 309 a significant disease burden in China. However, few clinical studies of the diagnosis  
7  
8 310 and treatment of GBC have been performed in China, making this significant  
9  
10 311 population underrepresented. By launching the CRGGC study, we also expect to  
11  
12 312 boost collaborations among Chinese researchers. We hope this collaboration could  
13  
14 313 induce further translational research and clinical trials in China, providing essential  
15  
16 314 evidence on GBC treatment.

17  
18 315 There are several limitations and potential biases in our study design. (1) The  
19  
20 316 retrospective nature is inevitably related to information bias and heterogeneity in the  
21  
22 317 data recording. This will cause difficulty in the standardization of data and a relatively  
23  
24 318 large proportion of missing data. To overcome such bias, we composed and continue  
25  
26 319 to update a codebook for standardization of each variable. Researchers responsible for  
27  
28 320 data entry are trained and qualified at the data centre. The missing data are analysed to  
29  
30 321 determine potential bias. (2) This is a retrospective study using convenience sampling.  
31  
32 322 Thus, the cohort may not be completely representative of GBC patients in China.  
33  
34 323 However, we attempt to include centres in every province in China. Moreover, most  
35  
36 324 cancer patients in China are treated in tertiary hospitals. (3) Biospecimens of the  
37  
38 325 involved patients are not collected. Future collaboration on this issue will be  
39  
40 326 considered. (4) As patients with incidental GBC may turn to other hospitals for re-  
41  
42 327 resection, resulting in incomplete treatment information. We addressed this problem  
43  
44 328 by defining these patients separately to aid further sensitivity analysis.

45  
46  
47 329  
48  
49  
50  
51  
52  
53  
54  
55  
56  
57  
58  
59  
60

### 330 **Acknowledgements**

331 We would like to thank Prof. Wenyi Yang at Shanghai General Hospital, China, and  
332 Prof. Jiong Li at Aarhus University, Denmark, for their valuable advice on the  
333 CRGGC registry. We thank our collaborators for their contributions to the CRGGC  
334 study, as follows: Prof. Lianxin Liu at Anhui Provincial Hospital, Prof. Xu Liu at  
335 Peking University Shenzhen Hospital, Prof. Yinmo Yang at Peking University First  
336 Hospital, Prof. Qiang Xu at Peking Union Medical College Hospital, Prof. Banghao  
337 Xu at The First Affiliated Hospital of Guangxi Medical University, Prof. Jianhua Liu  
338 at The Second Hospital of Hebei Medical University, Prof. Baobiing Yin at Huashan  
339 Hospital, Prof. Weilong Cai at Huzhou Central Hospital, Prof. Zhiping Zhang at  
340 Ningbo First Hospital, Prof. Xuting Zhi at Qilu Hospital of Shandong University,  
341 Prof. Longhua Rao at Central Hospital of Minhang District, Prof. Xiaoping Yang at  
342 Shanghai Pudong Hospital, Prof. Jiahua Yang at Putuo District People's Hospital of  
343 Shanghai, Prof. Ruiwu Dai at Chengdu Military General Hospital, Prof. Leida Zhang  
344 at Southwest Hospital, Prof. Xinbao Wang at Zhejiang Cancer Hospital, Prof. Jinhui  
345 Zhou at The Second Affiliated Hospital of Zhejiang University School of Medicine,  
346 Prof. Yongjun Chen at Ruijin Hospital, and Prof. Yongwei Sun at Renji Hospital. We  
347 would also like to thank the researchers who made significant contributions to the  
348 CRGGC registry, as follows: Prof. Min Wang at Tongji Hospital, Prof. Rongsheng  
349 Zhang at Shanxi Provincial Cancer Hospital, Dr. Kai Qu at The First Affiliated  
350 Hospital of Xi'an Jiaotong University, Prof. Lei Zou at The First Affiliated Hospital of  
351 Kunming Medical University, Prof. Fubao Liu at The First Affiliated Hospital of  
352 Anhui Medical University, Prof. Leibo Xu at Sun Yat-Sen Memorial Hospital, Sun  
353 Yat-Sen University, Prof. Xianhai Mao at People's Hospital of Hunan Province, Prof.  
354 Ling Zhang at Henan Cancer Hospital, Dr. Zhizhen Li at Eastern Hepatobiliary  
355 Surgery Hospital, and Dr. Lei Wang at Wuxi Second People's Hospital.

### 356 **Authors' Contributions**

1  
2  
3  
4 357 LYB is the principal investigator steering the CRGGC and collaboration with other  
5  
6 358 centres. Tai Ren, Yongsheng Li, Xi Zhang wrote and revised the manuscript. Tai Ren,  
7  
8 359 Yongsheng Li, Yajun Geng, Ziyu Shao, Maolan Li, Xiangsong Wu, Xu-An Wang,  
9  
10 360 Wenguang Wu, Yijun Shu, Runfa Bao, Wei Gong, and Ping Dong discussed and  
11  
12 361 drafted the CRF, standard operation procedure in data collection and management,  
13  
14 362 and standard of quality control. Tai Ren and Yongsheng Li are responsible for study  
15  
16 363 management and coordination. All authors are responsible for data collection and  
17  
18 364 quality control in their hospitals. All authors reviewed the manuscript for intellectual  
19  
20 365 content and approved the final version of the report.

#### 21 22 366 **Funding statement**

23  
24  
25 367 This study was supported by the National Natural Science Foundation of China (No.  
26  
27 368 31620103910, 81874181, and 91940305), the Emerging Frontier Program of Hospital  
28  
29 369 Development Center (No. SHDC12018107), the Key Program of Shanghai Science  
30  
31 370 and Technology Commission (No. YDZX20193100004049), the Shanghai Key  
32  
33 371 Laboratory of Biliary Tract Disease Research Foundation (17DZ2260200), the  
34  
35 372 Shanghai Artificial Intelligence Innovation and Development Project (2019, Project of  
36  
37 373 Xinhua Hospital Affiliated to Shanghai Jiao Tong University School of Medicine), the  
38  
39 374 Multi-Center Clinical Research Project of Shanghai Jiao Tong University School of  
40  
41 375 Medicine (DLY201507) and the Translational Medicine Innovation Fund of Shanghai  
42  
43 376 Jiao Tong University School of Medicine (15ZH4003).

#### 44 45 46 377 **Competing interests statement**

47  
48 378 All authors declare no competing interests.

#### 49 50 51 379 **Word Count:**

52  
53 380 3514 (from abstract to discussion)

54  
55  
56 381

57  
58  
59 382

383 **References**

- 384 1. Hundal R, Shaffer EA. Gallbladder cancer: epidemiology and outcome. *Clin Epidemiol*  
385 2014;6:99-109. doi: 10.2147/CLEP.S37357 [published Online First: 2014/03/19]
- 386 2. Misra S, Chaturvedi A, Misra NC, et al. Carcinoma of the gallbladder. *The Lancet Oncology*  
387 2003;4(3):167-76. doi: 10.1016/s1470-2045(03)01021-0
- 388 3. Li M, Zhang Z, Li X, et al. Whole-exome and targeted gene sequencing of gallbladder carcinoma  
389 identifies recurrent mutations in the ErbB pathway. *Nat Genet* 2014;46(8):872-6. doi:  
390 10.1038/ng.3030 [published Online First: 2014/07/07]
- 391 4. Lindner P, Holmberg E, Hafstrom L. Gallbladder cancer - no improvement in survival over time  
392 in a Swedish population. *Acta Oncol* 2018;57(11):1482-89. doi:  
393 10.1080/0284186X.2018.1478124 [published Online First: 2018/06/23]
- 394 5. Surveillance, Epidemiology, and End Results (SEER) Program (www.seer.cancer.gov) Research  
395 Data (1973-2016), National Cancer Institute, DCCPS, Surveillance Research Program,  
396 released April 2019, based on the May 2019 submission.
- 397 6. Creasy JM, Goldman DA, Gonen M, et al. Evolution of surgical management of gallbladder  
398 carcinoma and impact on outcome: results from two decades at a single-institution. *HPB :  
399 the official journal of the International Hepato Pancreato Biliary Association*  
400 2019;21(11):1541-51. doi: 10.1016/j.hpb.2019.03.370 [published Online First: 2019/04/28]
- 401 7. NCCN Clinical Practice Guidelines in Oncology: Hepatobiliary Cancers, Version 4. 2019:  
402 National Comprehensive Cancer Network,; 2019 [2020-02-13]. Available from:  
403 [https://www.nccn.org/professionals/physician\\_gls/pdf/hepatobiliary.pdf](https://www.nccn.org/professionals/physician_gls/pdf/hepatobiliary.pdf).
- 404 8. American Joint Committee on Cancer. AJCC Cancer Staging Manual, 8th Edition 2017.
- 405 9. Shindoh J, de Aretxabala X, Aloia TA, et al. Tumor location is a strong predictor of tumor  
406 progression and survival in T2 gallbladder cancer: an international multicenter study. *Ann  
407 Surg* 2015;261(4):733-9. doi: 10.1097/SLA.0000000000000728 [published Online First:  
408 2014/05/24]
- 409 10. Amini N, Kim Y, Wilson A, et al. Prognostic Implications of Lymph Node Status for Patients  
410 With Gallbladder Cancer: A Multi-Institutional Study. *Ann Surg Oncol* 2016;23(9):3016-  
411 23. doi: 10.1245/s10434-016-5243-y [published Online First: 2016/05/07]
- 412 11. Ito H, Ito K, D'Angelica M, et al. Accurate staging for gallbladder cancer: implications for  
413 surgical therapy and pathological assessment. *Ann Surg* 2011;254(2):320-5. doi:  
414 10.1097/SLA.0b013e31822238d8 [published Online First: 2011/05/28]

- 1  
2  
3 415 12. Tuo J, Zhang M, Zheng R, et al. [Report of incidence and mortality of gallbladder cancer in  
4 416 China, 2014]. *Chin J Oncol* 2018;40(12):894-99. doi: 10.3760/cma.j.issn.0253-  
5 417 3766.2018.12.004  
6  
7  
8 418 13. Bray F, Ferlay J, Soerjomataram I, et al. Global cancer statistics 2018: GLOBOCAN estimates  
9 419 of incidence and mortality worldwide for 36 cancers in 185 countries. *CA Cancer J Clin*  
10 420 2018;68(6):394-424. doi: 10.3322/caac.21492 [published Online First: 2018/09/13]  
11  
12  
13 421 14. Vo E, Curley SA, Chai CY, et al. National Failure of Surgical Staging for T1b Gallbladder  
14 422 Cancer. *Ann Surg Oncol* 2019;26(2):604-10. doi: 10.1245/s10434-018-7064-7 [published  
15 423 Online First: 2018/12/01]  
16  
17  
18 424 15. Facility Oncology Registry Data System. 3rd ed, ed. Chicago, IL: American College of Surgeons  
19 425 2002.  
20  
21  
22 426 16. Collaborative Stage Work Group of the American Joint Committee on Cancer. Collaborative  
23 427 Stage Data Collection System User Documentation and Coding Instructions. version 02.04  
24 428 ed. Chicago, IL: American Joint Committee on Cancer 2012.  
25  
26  
27 429 17. Zou S, Zhang L. [Clinical epidemiologic characteristics of carcinoma of gallbladder in China].  
28 430 *Chinese Journal of Practical Surgery* 2000;20(1):43-46.  
29  
30  
31 431 18. Shen H, Song H, Wang L, et al. [Clinical feature of gallbladder cancer in Northwestern China:  
32 432 a report of 2379 cases from 17 institutions]. *Chinese Journal of Surgery* 2015;53(10):747-  
33 433 51. doi: 10.3760/cma.j.issn.0529-5815.2015.10.007  
34  
35  
36 434 19. Hsing AW, Gao Y-T, Devesa SS, et al. Rising incidence of biliary tract cancers in Shanghai,  
37 435 China. *Int J Cancer* 1998;75:368-70. doi: 10.1002/(sici)1097-  
38 436 0215(19980130)75:3<368::aid-ijc7>3.0.co;2-0  
39  
40  
41 437 20. Bao PP, Zheng Y, Wu CX, et al. Cancer incidence in urban Shanghai, 1973-2010: an updated  
42 438 trend and age-period-cohort effects. *BMC Cancer* 2016;16:284. doi: 10.1186/s12885-016-  
43 439 2313-2 [published Online First: 2016/04/23]  
44  
45  
46 440 21. Brierley JD, Gospodarowicz MK, Wittekind C. TNM Classification of Malignant Tumours, 8th  
47 441 ed: Wiley 2018.  
48  
49  
50 442 22. Kishi Y, Shimada K, Hata S, et al. Definition of T3/4 and Regional Lymph Nodes in Gallbladder  
51 443 Cancer: Which Is More Valid, the UICC or the Japanese Staging System? *Annals of*  
52 444 *Surgical Oncology* 2012;19(11):3567-73. doi: 10.1245/s10434-012-2599-5  
53  
54  
55 445 23. World Health Organization. International classification of diseases for oncology (ICD-O) – 3rd  
56 446 edition, 1st revision. 3rd ed. ed. Geneva 2013.  
57  
58  
59  
60



- 1  
2  
3  
4 447 24. Hata T, Motoi F, Ishida M, et al. Effect of Hospital Volume on Surgical Outcomes After  
5 448 Pancreaticoduodenectomy: A Systematic Review and Meta-analysis. *Ann Surg*  
6 449 2016;263(4):664-72. doi: 10.1097/SLA.0000000000001437 [published Online First:  
7 450 2015/12/05]
- 8  
9  
10 451 25. Chinese Society of Biliary Surgery. [Guidelines for the diagnosis and treatment of gallbladder  
11 452 carcinoma (2015 edition)]. *Chin J Dig Surg* 2015;14(11):881-90.
- 12  
13  
14 453 26. Bergquist JR, Shah HN, Habermann EB, et al. Adjuvant systemic therapy after resection of node  
15 454 positive gallbladder cancer: Time for a well-designed trial? (Results of a US-national  
16 455 retrospective cohort study). *Int J Surg* 2018;52:171-79. doi: 10.1016/j.ijso.2018.02.052  
17 456 [published Online First: 2018/03/03]
- 18  
19  
20  
21  
22  
23  
24  
25  
26  
27  
28  
29  
30  
31  
32  
33  
34  
35  
36  
37  
38  
39  
40  
41  
42  
43  
44  
45  
46  
47  
48  
49  
50  
51  
52  
53  
54  
55  
56  
57  
58  
59  
60

1  
2  
3  
4 457 **Figure legends**

5  
6 458 Fig. 1 Workflow of data collection and quality control in CRGGC.  
7

8 459  
9  
10  
11  
12  
13  
14  
15  
16  
17  
18  
19  
20  
21  
22  
23  
24  
25  
26  
27  
28  
29  
30  
31  
32  
33  
34  
35  
36  
37  
38  
39  
40  
41  
42  
43  
44  
45  
46  
47  
48  
49  
50  
51  
52  
53  
54  
55  
56  
57  
58  
59  
60

For peer review only

1  
2  
3  
4  
5  
6  
7  
8  
9  
10  
11  
12  
13  
14  
15  
16  
17  
18  
19  
20  
21  
22  
23  
24  
25  
26  
27  
28  
29  
30  
31  
32  
33  
34  
35  
36  
37  
38  
39  
40  
41  
42  
43  
44  
45  
46  
47  
48  
49  
50  
51  
52  
53  
54  
55  
56  
57  
58  
59  
60

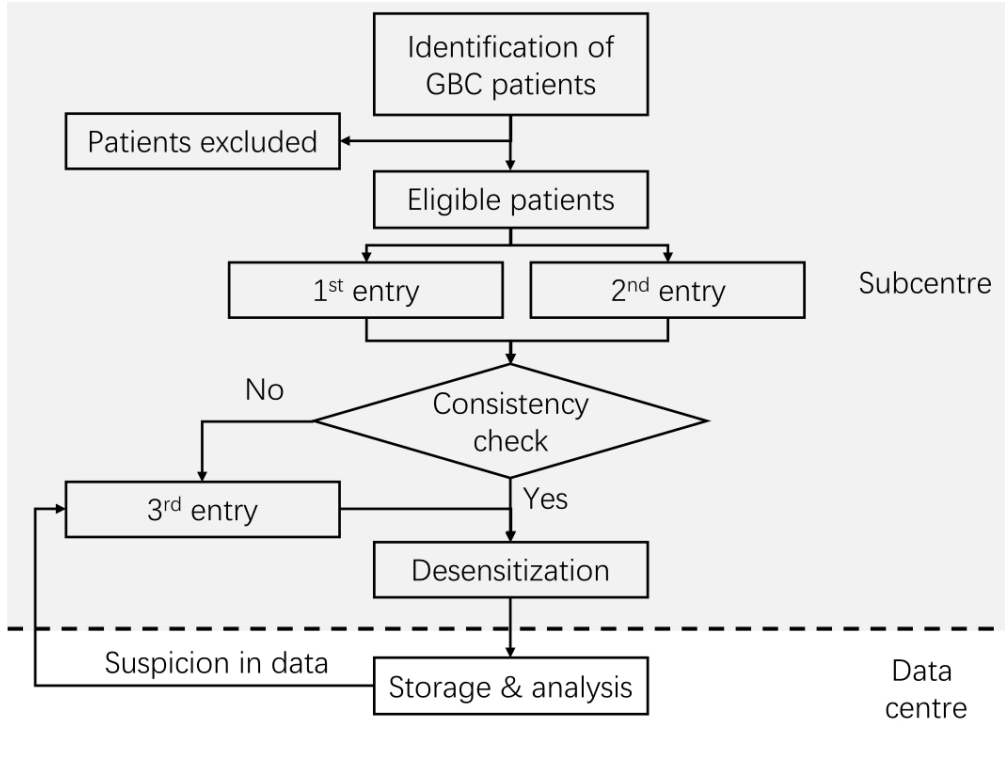

Fig. 1 Workflow of data collection and quality control in CRGGC.

## Protocol for a national gallbladder cancer registry study in China: the Chinese Research Group of Gallbladder Cancer (CRGGC) study

Tai Ren; Yongsheng Li, Xi Zhang, ... , Ying-Bin Liu, MD, FACS, on behalf of the CRGGC

### ONLINE SUPPLEMENTARY FILE 1

List of collaborators in the Chinese Research Group of Gallbladder Cancer (CRGGC) study

| Province | Hospital                                                                                   | Principle investigator |
|----------|--------------------------------------------------------------------------------------------|------------------------|
| Shanghai | Xin Hua Hospital Affiliated to Shanghai Jiao Tong University School of Medicine            | Prof. Yingbin Liu      |
| Shanghai | Eastern Hepatobiliary Surgery Hospital                                                     | Prof. Xiaoqing Jiang   |
| Shanghai | Shanghai General Hospital                                                                  | Prof. Junmin Xu        |
| Shanghai | Zhongshan Hospital                                                                         | Prof. Houbao Liu       |
| Shanghai | Huashan Hospital                                                                           | Prof. Baobiing Yin     |
| Shanghai | Ruijin Hospital                                                                            | Prof. Yongjun Chen     |
| Shanghai | Renji Hospital                                                                             | Prof. Yongwei Sun      |
| Shanghai | Shanghai Fengxian District Central Hospital                                                | Prof. Xueli Zhang      |
| Shanghai | Shanghai Pudong Hospital                                                                   | Prof. Xiaoping Yang    |
| Shanghai | Central Hospital of Minhang District, Shanghai                                             | Prof. Longhua Rao      |
| Shanghai | Putuo District People's Hospital of Shanghai                                               | Prof. Jiahua Yang      |
| Shanghai | Xinhua (Chongming) Hospital Affiliated to Shanghai Jiao Tong University School of Medicine | Prof. Zhewei Fei       |
| Zhejiang | Sir Run Run Shaw Hospital                                                                  | Prof. Defei Hong       |
| Zhejiang | The Second Affiliated Hospital of Zhejiang University School of medicine                   | Prof. Jinhui Zhou      |

|          |                                                                                           |                     |
|----------|-------------------------------------------------------------------------------------------|---------------------|
| Zhejiang | Zhejiang Cancer Hospital                                                                  | Prof. Xinbao Wang   |
| Zhejiang | The First Affiliated Hospital of Wenzhou Medical University                               | Dr. Bo Yang         |
| Zhejiang | Shaoxing People's Hospital                                                                | Prof. Feng Tao      |
| Zhejiang | Shaoxing Second Hospital                                                                  | Prof. Zaiyang Zhang |
| Zhejiang | Yinzhou Hospital Affiliated to Medical School of Ningbo University                        | Prof. Kejun Hua     |
| Zhejiang | Huzhou Central Hospital                                                                   | Prof. Weilong Cai   |
| Zhejiang | Ningbo First Hospital                                                                     | Prof. Zhiping Zhang |
| Zhejiang | Taizhou Municipal Hospital                                                                | Prof. Chong Jin     |
| Jiangsu  | Nanjing Drum Tower Hospital, the Affiliated Hospital of Nanjing University Medical School | Prof. Yudong Qiu    |
| Jiangsu  | The Second Affiliated Hospital of Suzhou University                                       | Prof. Xiaoming Ma   |
| Jiangsu  | The Affiliated Hospital of Xuzhou Medical University                                      | Prof. Jian Hong     |
| Jiangsu  | Xuzhou Central Hospital                                                                   | Prof. Yuzhen Xu     |
| Jiangsu  | Wuxi Second People's Hospital                                                             | Prof. Huihan Jin    |
| Jiangsu  | Changshu No.1 People's Hospital                                                           | Prof. Jianfeng Gu   |
| Jiangsu  | Changzhou No.2 People's Hospital                                                          | Prof. Chunfu Zhu    |
| Jiangsu  | Affiliated Hospital of Nantong University                                                 | Prof. Peng Wang     |
| Jiangsu  | Nantong Tumor Hospital                                                                    | Prof. Hongyu Cai    |
| Jiangsu  | The First People's Hospital of Nantong                                                    | Prof. Hong Zang     |
| Jiangsu  | The First People's Hospital of Taicang                                                    | Prof. Yi Wang       |
| Jiangsu  | Xinghua City People's Hospital                                                            | Prof. Xiang Wang    |
| Beijing  | Peking Union Medical College Hospital                                                     | Prof. Qiang Xu      |
| Beijing  | Peking University First Hospital                                                          | Prof. Yinmo Yang    |
| Tianjin  | Tianjin Medical University Cancer Hospital                                                | Prof. Jihui Hao     |
| Hebei    | The Second Hospital of Hebei Medical University                                           | Prof. Jianhua Liu   |
| Henan    | Henan Cancer Hospital                                                                     | Prof. Yawei Hua     |

|                |                                                             |                      |
|----------------|-------------------------------------------------------------|----------------------|
| Henan          | The Fifth Affiliated Hospital of Zhengzhou University       | Prof. Xiaoyong Li    |
| Shandong       | Shandong Provincial Hospital                                | Prof. Jun Liu        |
| Shandong       | Qilu Hospital of Shandong University                        | Prof. Xuting Zhi     |
| Shandong       | The Affiliated Hospital of Qingdao University               | Prof. Jingyu Cao     |
| Shanxi         | Heping Hospital Affiliated to Changzhi Medical College      | Prof. Buqiang Wu     |
| Shanxi         | First Hospital of Shanxi Medical University                 | Prof. Jiansheng Liu  |
| Shanxi         | Shanxi Provincial Cancer Hospital                           | Prof. Xueyi Dang     |
| Inner Mongolia | Baotou City Central Hospital                                | Prof. Mingzhang Li   |
| Inner Mongolia | Tongliao City Hospital                                      | Prof. Xuedong Feng   |
| Heilongjiang   | The First Affiliated Hospital of Harbin Medical University  | Prof. Bei Sun        |
| Heilongjiang   | The Second Affiliated Hospital of Harbin Medical University | Prof. Yunfu Cui      |
| Heilongjiang   | Harbin Medical University Cancer Hospital                   | Prof. Bing Li        |
| Jilin          | The First Bethune Hospital of Jilin University              | Prof. Chuanlei Wang  |
| Jilin          | The Second Hospital of Jilin University                     | Prof. Xuewen Zhang   |
| Jilin          | China-Japan Union Hospital of Jilin University              | Prof. Hong Cao       |
| Liaoning       | Shengjing Hospital of China Medical University              | Prof. Chaoliu Dai    |
| Hubei          | Tongji Hospital                                             | Prof. Renyi Qin      |
| Hunan          | People's Hospital of Hunan Province                         | Prof. Changjun Liu   |
| Anhui          | The First Affiliated Hospital of Anhui Medical University   | Prof. Yeben Qian     |
| Anhui          | Anhui Provincial Hospital                                   | Prof. Lianxin Liu    |
| Anhui          | The First Affiliated Hospital of Bengbu Medical College     | Prof. Jianguang Jia  |
| Jiangxi        | The Second Affiliated Hospital of Nanchang University       | Prof. Lu Fang        |
| Jiangxi        | The First Affiliated Hospital of Nanchang University        | Prof. Linhui Zheng   |
| Jiangxi        | Jiangxi Provincial People's Hospital                        | Prof. Xiaoliang Chen |
| Jiangxi        | Jiangxi Cancer Hospital                                     | Prof. Qiyun Li       |

|    |           |                                                              |                     |
|----|-----------|--------------------------------------------------------------|---------------------|
| 1  |           |                                                              |                     |
| 2  |           |                                                              |                     |
| 3  |           |                                                              |                     |
| 4  |           |                                                              |                     |
| 5  | Shaanxi   | The First Affiliated Hospital of Xi'an Jiaotong University   | Prof. Chang Liu     |
| 6  | Shaanxi   | Xijing Hospital                                              | Prof. Lin Wang      |
| 7  |           |                                                              |                     |
| 8  | Gansu     | The First Hospital of Lanzhou University                     | Prof. Xun Li        |
| 9  | Qinghai   | Qinghai Provincial People's Hospital                         | Prof. Haihong Zhu   |
| 10 | Xinjiang  | The First Affiliated Hospital of Xinjiang Medical University | Prof. Wei Han       |
| 11 |           |                                                              |                     |
| 12 | Chongqing | Southwest Hospital                                           | Prof. Leida Zhang   |
| 13 | Sichuan   | Chengdu Military General Hospital                            | Prof. Ruiwu Dai     |
| 14 | Yunnan    | The First Affiliated Hospital of Kunming Medical University  | Prof. Kunhua Wang   |
| 15 |           |                                                              |                     |
| 16 | Fujian    | Fujian Provincial Hospital                                   | Prof. Maolin Yan    |
| 17 | Guangdong | Sun Yat-Sen Memorial Hospital, Sun Yat-Sen University        | Prof. Chao Liu      |
| 18 | Guangdong | Peking University Shenzhen Hospital                          | Prof. Xu Liu        |
| 19 |           |                                                              |                     |
| 20 | Guangxi   | The First Affiliated Hospital of Guangxi Medical University  | Prof. Banghao Xu    |
| 21 | Hainan    | Hainan Provincial People's Hospital                          | Prof. Jinfang Zheng |
| 22 |           |                                                              |                     |
| 23 |           |                                                              |                     |
| 24 |           |                                                              |                     |
| 25 |           |                                                              |                     |
| 26 |           |                                                              |                     |
| 27 |           |                                                              |                     |
| 28 |           |                                                              |                     |
| 29 |           |                                                              |                     |
| 30 |           |                                                              |                     |
| 31 |           |                                                              |                     |
| 32 |           |                                                              |                     |
| 33 |           |                                                              |                     |
| 34 |           |                                                              |                     |
| 35 |           |                                                              |                     |
| 36 |           |                                                              |                     |
| 37 |           |                                                              |                     |
| 38 |           |                                                              |                     |
| 39 |           |                                                              |                     |
| 40 |           |                                                              |                     |
| 41 |           |                                                              |                     |
| 42 |           |                                                              |                     |
| 43 |           |                                                              |                     |
| 44 |           |                                                              |                     |
| 45 |           |                                                              |                     |
| 46 |           |                                                              |                     |

**STROBE checklist of cohort studies**

|                              | <b>Item No</b> | <b>Recommendation</b>                                                                                                                                                                               | <b>Page Number</b> |
|------------------------------|----------------|-----------------------------------------------------------------------------------------------------------------------------------------------------------------------------------------------------|--------------------|
| <b>Title and abstract</b>    | 1              | (a) Indicate the study's design with a commonly used term in the title or the abstract                                                                                                              | 6                  |
|                              |                | (b) Provide in the abstract an informative and balanced summary of what was done and what was found                                                                                                 | 6                  |
| <b>Introduction</b>          |                |                                                                                                                                                                                                     |                    |
| Background/rationale         | 2              | Explain the scientific background and rationale for the investigation being reported                                                                                                                | 8                  |
| Objectives                   | 3              | State specific objectives, including any prespecified hypotheses                                                                                                                                    | 9                  |
| <b>Methods</b>               |                |                                                                                                                                                                                                     |                    |
| Study design                 | 4              | Present key elements of study design early in the paper                                                                                                                                             | 9                  |
| Setting                      | 5              | Describe the setting, locations, and relevant dates, including periods of recruitment, exposure, follow-up, and data collection                                                                     | 10-11              |
| Participants                 | 6              | (a) Give the eligibility criteria, and the sources and methods of selection of participants. Describe methods of follow-up                                                                          | 10                 |
|                              |                | (b) For matched studies, give matching criteria and number of exposed and unexposed                                                                                                                 | NA                 |
| Variables                    | 7              | Clearly define all outcomes, exposures, predictors, potential confounders, and effect modifiers. Give diagnostic criteria, if applicable                                                            | 10-15              |
| Data sources/<br>measurement | 8*             | For each <b>variable of interest</b> , give sources of data and details of methods of assessment (measurement). Describe <b>comparability of assessment</b> methods if there is more than one group | 10-15              |
| Bias                         | 9              | Describe <b>any efforts to address potential sources of bias</b>                                                                                                                                    | 16                 |
| Study size                   | 10             | Explain how the <b>study size</b> was arrived at                                                                                                                                                    | 10                 |
| Quantitative variables       | 11             | Explain how quantitative variables were handled in the analyses. If applicable, describe which groupings were chosen and why                                                                        | 12-16              |
| Statistical methods          | 12             | (a) Describe <b>all statistical methods</b> , including those used to control for confounding                                                                                                       | 15-16              |
|                              |                | (b) Describe any methods used to <b>examine subgroups and interactions</b>                                                                                                                          | NA                 |
|                              |                | (c) Explain how <b>missing data</b> were addressed                                                                                                                                                  | 15                 |
|                              |                | (d) If applicable, explain how <b>loss to follow-up</b> was addressed                                                                                                                               | 10-11;<br>16       |



(e) Describe any **sensitivity analyses** NA  
 - Current analysis focused mainly on descriptive statistics. When specific questions are addressed in future analysis, sensitivity analyses will be designed.

---

## Results

|                   |     |                                                                                                                                                                                                              |    |
|-------------------|-----|--------------------------------------------------------------------------------------------------------------------------------------------------------------------------------------------------------------|----|
| Participants      | 13* | (a) Report numbers of individuals at each stage of study—eg numbers potentially eligible, examined for eligibility, confirmed eligible, included in the study, completing follow-up, and analysed            | NA |
|                   |     | (b) Give reasons for non-participation at each stage                                                                                                                                                         | NA |
|                   |     | (c) Consider use of a flow diagram                                                                                                                                                                           | NA |
| Descriptive data  | 14* | (a) Give characteristics of study participants (eg demographic, clinical, social) and information on exposures and potential confounders                                                                     | NA |
|                   |     | (b) Indicate number of participants with missing data for each variable of interest                                                                                                                          | NA |
|                   |     | (c) Summarise follow-up time (eg, average and total amount)                                                                                                                                                  | NA |
| Outcome data      | 15* | Report numbers of outcome events or summary measures over time                                                                                                                                               | NA |
| Main results      | 16  | (a) Give unadjusted estimates and, if applicable, confounder-adjusted estimates and their precision (eg, 95% confidence interval). Make clear which confounders were adjusted for and why they were included | NA |
|                   |     | (b) Report category boundaries when continuous variables were categorized                                                                                                                                    | NA |
|                   |     | (c) If relevant, consider translating estimates of relative risk into absolute risk for a meaningful time period                                                                                             | NA |
| Other analyses    | 17  | Report other analyses done—eg analyses of subgroups and interactions, and sensitivity analyses                                                                                                               | NA |
| <b>Discussion</b> |     |                                                                                                                                                                                                              |    |
| Key results       | 18  | Summarise key results with reference to study objectives                                                                                                                                                     | 17 |
| Limitations       | 19  | Discuss limitations of the study, taking into account sources of potential bias or imprecision. Discuss both direction and magnitude of any potential bias                                                   | 17 |
| Interpretation    | 20  | Give a cautious overall interpretation of results considering objectives, limitations, multiplicity of analyses, results from similar studies, and other relevant evidence                                   | NA |
| Generalisability  | 21  | Discuss the generalisability (external validity) of the study results                                                                                                                                        | NA |

**Other information**

---

|         |    |                                                            |    |
|---------|----|------------------------------------------------------------|----|
| Funding | 22 | Give the source of funding and the role of the funders     | 18 |
|         |    | for the present study and, if applicable, for the original |    |
|         |    | study on which the present article is based                |    |

---

For peer review only

# BMJ Open

## Protocol for a gallbladder cancer registry study in China: the Chinese Research Group of Gallbladder Cancer (CRGGC) study

|                               |                                                                                                                                                                                                                                                                                                                                                                                                                                                                                                                                                                                                                                                                                                                                                                                                                                                                                                                                                                                                                                                                                                                                                                                                                                                                                                                                                                                                                                                                                                                                                                                                                                                                                                                                                                                                                                                                                                                                                                                                                                                                                                                                                                                                                                                                                                                                                                                                                                                                                                                                                         |
|-------------------------------|---------------------------------------------------------------------------------------------------------------------------------------------------------------------------------------------------------------------------------------------------------------------------------------------------------------------------------------------------------------------------------------------------------------------------------------------------------------------------------------------------------------------------------------------------------------------------------------------------------------------------------------------------------------------------------------------------------------------------------------------------------------------------------------------------------------------------------------------------------------------------------------------------------------------------------------------------------------------------------------------------------------------------------------------------------------------------------------------------------------------------------------------------------------------------------------------------------------------------------------------------------------------------------------------------------------------------------------------------------------------------------------------------------------------------------------------------------------------------------------------------------------------------------------------------------------------------------------------------------------------------------------------------------------------------------------------------------------------------------------------------------------------------------------------------------------------------------------------------------------------------------------------------------------------------------------------------------------------------------------------------------------------------------------------------------------------------------------------------------------------------------------------------------------------------------------------------------------------------------------------------------------------------------------------------------------------------------------------------------------------------------------------------------------------------------------------------------------------------------------------------------------------------------------------------------|
| Journal:                      | <i>BMJ Open</i>                                                                                                                                                                                                                                                                                                                                                                                                                                                                                                                                                                                                                                                                                                                                                                                                                                                                                                                                                                                                                                                                                                                                                                                                                                                                                                                                                                                                                                                                                                                                                                                                                                                                                                                                                                                                                                                                                                                                                                                                                                                                                                                                                                                                                                                                                                                                                                                                                                                                                                                                         |
| Manuscript ID                 | bmjopen-2020-038634.R2                                                                                                                                                                                                                                                                                                                                                                                                                                                                                                                                                                                                                                                                                                                                                                                                                                                                                                                                                                                                                                                                                                                                                                                                                                                                                                                                                                                                                                                                                                                                                                                                                                                                                                                                                                                                                                                                                                                                                                                                                                                                                                                                                                                                                                                                                                                                                                                                                                                                                                                                  |
| Article Type:                 | Protocol                                                                                                                                                                                                                                                                                                                                                                                                                                                                                                                                                                                                                                                                                                                                                                                                                                                                                                                                                                                                                                                                                                                                                                                                                                                                                                                                                                                                                                                                                                                                                                                                                                                                                                                                                                                                                                                                                                                                                                                                                                                                                                                                                                                                                                                                                                                                                                                                                                                                                                                                                |
| Date Submitted by the Author: | 11-Nov-2020                                                                                                                                                                                                                                                                                                                                                                                                                                                                                                                                                                                                                                                                                                                                                                                                                                                                                                                                                                                                                                                                                                                                                                                                                                                                                                                                                                                                                                                                                                                                                                                                                                                                                                                                                                                                                                                                                                                                                                                                                                                                                                                                                                                                                                                                                                                                                                                                                                                                                                                                             |
| Complete List of Authors:     | <p>Ren, Tai; Xinhua Hospital Affiliated to Shanghai Jiaotong University School of Medicine, Department of General Surgery; Shanghai Key Laboratory of Biliary Tract Disease Research</p> <p>Li, Yongsheng; Shanghai Jiao Tong University School of Medicine Affiliated Renji Hospital, Department of Biliary-Pancreatic Surgery; Shanghai Key Laboratory of Biliary Tract Disease Research</p> <p>Zhang, Xi; Xinhua Hospital Affiliated to Shanghai Jiaotong University School of Medicine, Clinical Research Unit</p> <p>Geng, Yajun; Xinhua Hospital Affiliated to Shanghai Jiaotong University School of Medicine, Department of General Surgery; Shanghai Key Laboratory of Biliary Tract Disease Research</p> <p>Shao, Ziyu; Xinhua Hospital Affiliated to Shanghai Jiaotong University School of Medicine, Department of General Surgery; Shanghai Key Laboratory of Biliary Tract Disease Research</p> <p>Li, Maolan; Xinhua Hospital Affiliated to Shanghai Jiaotong University School of Medicine, Department of General Surgery; Shanghai Key Laboratory of Biliary Tract Disease Research</p> <p>Wu, Xiangsong; Xinhua Hospital Affiliated to Shanghai Jiaotong University School of Medicine, Department of General Surgery; Shanghai Key Laboratory of Biliary Tract Disease Research</p> <p>Wang, Xu-An; Xinhua Hospital Affiliated to Shanghai Jiaotong University School of Medicine, Department of General Surgery; Shanghai Key Laboratory of Biliary Tract Disease Research</p> <p>Liu, Fatao; Shanghai Key Laboratory of Biliary Tract Disease Research</p> <p>Wu, Wenguang; Xinhua Hospital Affiliated to Shanghai Jiaotong University School of Medicine, Department of General Surgery; Shanghai Key Laboratory of Biliary Tract Disease Research</p> <p>Shu, Yijun; Xinhua Hospital Affiliated to Shanghai Jiaotong University School of Medicine, Department of General Surgery; Shanghai Key Laboratory of Biliary Tract Disease Research</p> <p>Bao, Runfa; Xinhua Hospital Affiliated to Shanghai Jiaotong University School of Medicine, Department of General Surgery; Shanghai Key Laboratory of Biliary Tract Disease Research</p> <p>Gong, Wei; Xinhua Hospital Affiliated to Shanghai Jiaotong University School of Medicine, Department of General Surgery; Shanghai Key Laboratory of Biliary Tract Disease Research</p> <p>Dong, Ping; Xinhua Hospital Affiliated to Shanghai Jiaotong University School of Medicine, Department of General Surgery; Shanghai Key Laboratory of Biliary Tract Disease Research</p> |

|    |                                                                           |
|----|---------------------------------------------------------------------------|
| 1  |                                                                           |
| 2  |                                                                           |
| 3  |                                                                           |
| 4  | Dang, Xueyi; Shanxi Provincial Cancer Hospital, Department of General     |
| 5  | Surgery                                                                   |
| 6  | Liu, Chang; Xi'an Jiaotong University Medical College First Affiliated    |
| 7  | Hospital, Department of Hepatobiliary Surgery                             |
| 8  | Liu, Changjun; Hunan Provincial People's Hospital, Department of          |
| 9  | Hepatobiliary Surgery                                                     |
| 10 | Sun, Bei ; First Affiliated Hospital of Harbin Medical University,        |
| 11 | Department of HPB Surgery                                                 |
| 12 | Liu, Jun; Shandong Provincial Hospital, Department of Hepatobiliary       |
| 13 | Surgery                                                                   |
| 14 | Wang, Lin; Xijing Hospital, Department of Hepatobiliary Surgery           |
| 15 | Hong, Defei; Zhejiang University School of Medicine Sir Run Run Shaw      |
| 16 | Hospital, Department of HPB Surgery                                       |
| 17 | Qin, Renyi; Tongji Hospital of Tongji Medical College of Huazhong         |
| 18 | University of Science and Technology, Department of Pancreatobiliary      |
| 19 | Surgery                                                                   |
| 20 | Jiang, Xiaoqing; Eastern Hepatobiliary Surgery Hospital, Department of    |
| 21 | Biliary Surgery                                                           |
| 22 | Zhang, Xuewen; Jilin University Second Hospital, Department of HPB        |
| 23 | Surgery                                                                   |
| 24 | Xu, Junmin; Shanghai No1 People's Hospital, Department of General         |
| 25 | Surgery                                                                   |
| 26 | Jia, Jianguang; First Affiliated Hospital of Bengbu Medical College,      |
| 27 | Department of Surgical Oncology                                           |
| 28 | Yang, Bo; Wenzhou Medical University First Affiliated Hospital,           |
| 29 | Department of General Surgery                                             |
| 30 | Li, Bing; Tumor Hospital of Harbin Medical University, Department of      |
| 31 | HPB Surgery                                                               |
| 32 | Dai, Chaoliu; Shengjing Hospital of China Medical University, Department  |
| 33 | of Hepatobiliary Surgery                                                  |
| 34 | Cao, Jingyu; The Affiliated Hospital of Qingdao University, Department of |
| 35 | HPB Surgery                                                               |
| 36 | Cao, Hong; China-Japan Union Hospital of Jilin University, Department of  |
| 37 | GI Surgery                                                                |
| 38 | Tao, Feng; Shaoxing People's Hospital, Department of GI Surgery           |
| 39 | Zhang, Zaiyang; Shaoxing Second Hospital, Department of General           |
| 40 | Surgery                                                                   |
| 41 | Wang, Yi; First Peoples of Hospital of Taicang, Department of GI Surgery  |
| 42 | Jin, Huihan; Wuxi Second People's Hospital, Department of Hepatobiliary   |
| 43 | Surgery                                                                   |
| 44 | Cai, Hongyu; Nantong Tumor Hospital, Department of Hepatobiliary          |
| 45 | Surgery                                                                   |
| 46 | Fei, Zhewei; Shanghai Jiaotong University School of Medicine Xinhua       |
| 47 | Hospital Chongming Branch, Department of General Surgery                  |
| 48 | Gu, Jianfeng; Changshu No. 1 People's Hospital, Department of General     |
| 49 | Surgery                                                                   |
| 50 | Han, Wei; Xinjiang Medical University Affiliated First Hospital,          |
| 51 | Department of Pancreatic Surgery                                          |
| 52 | Feng, Xuedong; Tongliao City Hospital, Department of General Surgery      |
| 53 | Fang, Lu; Nanchang University Second Affiliated Hospital, Department of   |
| 54 | Hepatobiliary Surgery                                                     |
| 55 | Zheng, Linhui; First Affiliated Hospital of Nanchang University,          |
| 56 | Department of General Surgery                                             |
| 57 | Zhu, Chunfu; Changzhou No. 2 People's Hospital, Department of HPB         |
| 58 | Surgery                                                                   |
| 59 | Wang, Kunhua; Kunming Medical University First Affiliated Hospital,       |
| 60 | Department of General Surgery                                             |
|    | Zhang, Xueli; Shanghai Fengxian Central Hospital, Department of           |
|    | General Surgery                                                           |
|    | Li, Xiaoyong; The Fifth Affiliated Hospital of Zhengzhou University,      |
|    | Department of HPB Surgery                                                 |

|                                 |                                                                                                                                                                                                                                                                                                                                                                                                                                                                                                                                                                                                                                                                                                                                                                                                                                                                                                                                                                                                                                                                                                                                                                                                                                                                                                                                                                                                                                                                                                                                                                                                                                                                                                                                                                                                                                                                                                                                                                                                                                                                                                                                                                                                                                                                                                                                                                                                                                                                                                                                       |
|---------------------------------|---------------------------------------------------------------------------------------------------------------------------------------------------------------------------------------------------------------------------------------------------------------------------------------------------------------------------------------------------------------------------------------------------------------------------------------------------------------------------------------------------------------------------------------------------------------------------------------------------------------------------------------------------------------------------------------------------------------------------------------------------------------------------------------------------------------------------------------------------------------------------------------------------------------------------------------------------------------------------------------------------------------------------------------------------------------------------------------------------------------------------------------------------------------------------------------------------------------------------------------------------------------------------------------------------------------------------------------------------------------------------------------------------------------------------------------------------------------------------------------------------------------------------------------------------------------------------------------------------------------------------------------------------------------------------------------------------------------------------------------------------------------------------------------------------------------------------------------------------------------------------------------------------------------------------------------------------------------------------------------------------------------------------------------------------------------------------------------------------------------------------------------------------------------------------------------------------------------------------------------------------------------------------------------------------------------------------------------------------------------------------------------------------------------------------------------------------------------------------------------------------------------------------------------|
|                                 | <p>Jin, Chong; Taizhou Hospital of Zhejiang Province, Department of General Surgery</p> <p>Qian, Yeben; First Affiliated Hospital of Anhui Medical University, Department of HPB Surgery</p> <p>Cui, Yunfu; Second Affiliated Hospital of Harbin Medical University, Department of Pancreatobiliary Surgery</p> <p>Xu, Yuzhen; Xuzhou Municipal Fourth People's Hospital, Department of GI Surgery</p> <p>Wang, Xiang; Xinghua City People's Hospital, Department of HPB Surgery</p> <p>Liu, Houbao; Zhong Shan Hospital, Department of General Surgery</p> <p>Hua, Yawei; Henan Cancer Hospital, Department of General Surgery</p> <p>Liu, Chao; Sun Yat-Sen Memorial Hospital, Department of Pancreatobiliary Surgery</p> <p>Hao, Jihui; Tianjin Medical University Cancer Institute and Hospital, Department of Pancreatic Surgery</p> <p>Wang, Chuanlei; Jilin University First Hospital, Department of HPB Surgery</p> <p>Li, Qiyun; Jiangxi Cancer Hospital, Department of Abdominal Surgery</p> <p>Li, Xun; Lanzhou University First Affiliated Hospital, Department of General Surgery</p> <p>Liu, Jiansheng; First Hospital of Shanxi Medical University, Department of General Surgery</p> <p>Li, Mingzhang; Baotou City Central Hospital, Department of General Surgery</p> <p>Qiu, Yudong; Nanjing Drum Tower Hospital, Department of Pancreatobiliary Surgery</p> <p>Wu, Buqiang; Changzhi Medical College Affiliated Heping Hospital, Department of General Surgery</p> <p>Zheng, Jinfang; Hainan Provincial People's Hospital, Department of General Surgery</p> <p>Chen, Xiaoliang; Jiangxi Provincial People's Hospital, Department of Hepatobiliary Surgery</p> <p>Zhu, Haihong; Qinghai Provincial People's Hospital, Department of General Surgery</p> <p>Hua, Kejun; Yinzhou People's Hospital, Department of General Surgery</p> <p>Yan, Maolin; Fujian Provincial Hospital, Department of Hepatobiliary Surgery</p> <p>Wang, Peng; Nantong University Affiliated Hospital, Department of HPB Surgery</p> <p>Zang, Hong; The First People's Hospital of Nantong, Department of Hepatobiliary Surgery</p> <p>Ma, Xiaoming; Second Affiliated Hospital of Soochow University, Department of General Surgery</p> <p>Hong, Jian; Xuzhou Medical College Affiliated Hospital, Department of General Surgery</p> <p>Liu, Yingbin; Shanghai Jiao Tong University School of Medicine Affiliated Renji Hospital, Department of Biliary-Pancreatic Surgery; Shanghai Key Laboratory of Biliary Tract Disease Research</p> |
| <b>Primary Subject Heading</b>: | Gastroenterology and hepatology                                                                                                                                                                                                                                                                                                                                                                                                                                                                                                                                                                                                                                                                                                                                                                                                                                                                                                                                                                                                                                                                                                                                                                                                                                                                                                                                                                                                                                                                                                                                                                                                                                                                                                                                                                                                                                                                                                                                                                                                                                                                                                                                                                                                                                                                                                                                                                                                                                                                                                       |
| Secondary Subject Heading:      | Oncology, Epidemiology, Surgery                                                                                                                                                                                                                                                                                                                                                                                                                                                                                                                                                                                                                                                                                                                                                                                                                                                                                                                                                                                                                                                                                                                                                                                                                                                                                                                                                                                                                                                                                                                                                                                                                                                                                                                                                                                                                                                                                                                                                                                                                                                                                                                                                                                                                                                                                                                                                                                                                                                                                                       |
| Keywords:                       | ONCOLOGY, Hepatobiliary disease < GASTROENTEROLOGY, SURGERY                                                                                                                                                                                                                                                                                                                                                                                                                                                                                                                                                                                                                                                                                                                                                                                                                                                                                                                                                                                                                                                                                                                                                                                                                                                                                                                                                                                                                                                                                                                                                                                                                                                                                                                                                                                                                                                                                                                                                                                                                                                                                                                                                                                                                                                                                                                                                                                                                                                                           |
|                                 |                                                                                                                                                                                                                                                                                                                                                                                                                                                                                                                                                                                                                                                                                                                                                                                                                                                                                                                                                                                                                                                                                                                                                                                                                                                                                                                                                                                                                                                                                                                                                                                                                                                                                                                                                                                                                                                                                                                                                                                                                                                                                                                                                                                                                                                                                                                                                                                                                                                                                                                                       |

1  
2  
3  
4  
5  
6  
7  
8  
9  
10  
11  
12  
13  
14  
15  
16  
17  
18  
19  
20  
21  
22  
23  
24  
25  
26  
27  
28  
29  
30  
31  
32  
33  
34  
35  
36  
37  
38  
39  
40  
41  
42  
43  
44  
45  
46  
47  
48  
49  
50  
51  
52  
53  
54  
55  
56  
57  
58  
59  
60

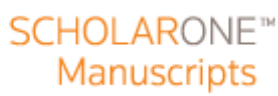



I, the Submitting Author has the right to grant and does grant on behalf of all authors of the Work (as defined in the below author licence), an exclusive licence and/or a non-exclusive licence for contributions from authors who are: i) UK Crown employees; ii) where BMJ has agreed a CC-BY licence shall apply, and/or iii) in accordance with the terms applicable for US Federal Government officers or employees acting as part of their official duties; on a worldwide, perpetual, irrevocable, royalty-free basis to BMJ Publishing Group Ltd ("BMJ") its licensees and where the relevant Journal is co-owned by BMJ to the co-owners of the Journal, to publish the Work in this journal and any other BMJ products and to exploit all rights, as set out in our [licence](#).

The Submitting Author accepts and understands that any supply made under these terms is made by BMJ to the Submitting Author unless you are acting as an employee on behalf of your employer or a postgraduate student of an affiliated institution which is paying any applicable article publishing charge ("APC") for Open Access articles. Where the Submitting Author wishes to make the Work available on an Open Access basis (and intends to pay the relevant APC), the terms of reuse of such Open Access shall be governed by a Creative Commons licence – details of these licences and which [Creative Commons](#) licence will apply to this Work are set out in our licence referred to above.

Other than as permitted in any relevant BMJ Author's Self Archiving Policies, I confirm this Work has not been accepted for publication elsewhere, is not being considered for publication elsewhere and does not duplicate material already published. I confirm all authors consent to publication of this Work and authorise the granting of this licence.

1  
2  
3  
4 **Protocol for a gallbladder cancer registry study in China: the Chinese Research**  
5 **Group of Gallbladder Cancer (CRGGC) study**  
6  
7  
8  
9

10 Tai Ren<sup>#,1,2,3</sup>; Yongsheng Li<sup>#,2,4</sup>, Xi Zhang<sup>#,5</sup>, Yajun Geng<sup>1,2</sup>, Ziyu Shao<sup>1,2</sup>, Maolan  
11 Li<sup>1,2</sup>, Xiangsong Wu<sup>1,2</sup>, Xu-An Wang<sup>1,2</sup>, Fatao Liu<sup>2,3</sup>, Wenguang Wu<sup>1,2</sup>, Yijun Shu<sup>1,2</sup>,  
12 Runfa Bao<sup>1,2</sup>, Wei Gong<sup>1,2</sup>, Ping Dong<sup>1,2</sup>, Xueyi Dang<sup>6</sup>, Chang Liu<sup>7</sup>, Changjun Liu<sup>8</sup>,  
13 Bei Sun<sup>9</sup>, Jun Liu<sup>10</sup>, Lin Wang<sup>11</sup>, Defei Hong<sup>12</sup>, Renyi Qin<sup>13</sup>, Xiaoqing Jiang<sup>14</sup>,  
14 Xuewen Zhang<sup>15</sup>, Junmin Xu<sup>16</sup>, Jianguang Jia<sup>17</sup>, Bo Yang<sup>18</sup>, Bing Li<sup>19</sup>, Chaoliu Dai<sup>20</sup>,  
15 Jingyu Cao<sup>21</sup>, Hong Cao<sup>22</sup>, Feng Tao<sup>23</sup>, Zaiyang Zhang<sup>24</sup>, Yi Wang<sup>25</sup>, Huihan Jin<sup>26</sup>,  
16 Hongyu Cai<sup>27</sup>, Zhewei Fei<sup>28</sup>, Jianfeng Gu<sup>29</sup>, Wei Han<sup>30</sup>, Xuedong Feng<sup>31</sup>, Lu Fang<sup>32</sup>,  
17 Linhui Zheng<sup>33</sup>, Chunfu Zhu<sup>34</sup>, Kunhua Wang<sup>35</sup>, Xueli Zhang<sup>36</sup>, Xiaoyong Li<sup>37</sup>,  
18 Chong Jin<sup>38</sup>, Yeben Qian<sup>39</sup>, Yunfu Cui<sup>40</sup>, Yuzhen Xu<sup>41</sup>, Xiang Wang<sup>42</sup>, Houbao Liu<sup>43</sup>,  
19 Yawei Hua<sup>44</sup>, Chao Liu<sup>45</sup>, Jihui Hao<sup>46</sup>, Chuanlei Wang<sup>47</sup>, Qiyun Li<sup>48</sup>, Xun Li<sup>49</sup>,  
20 Jiansheng Liu<sup>50</sup>, Mingzhang Li<sup>51</sup>, Yudong Qiu<sup>52</sup>, Buqiang Wu<sup>53</sup>, Jinfang Zheng<sup>54</sup>,  
21 Xiaoliang Chen<sup>55</sup>, Haihong Zhu<sup>56</sup>, Kejun Hua<sup>57</sup>, Maolin Yan<sup>58</sup>, Peng Wang<sup>59</sup>, Hong  
22 Zang<sup>60</sup>, Xiaoming Ma<sup>61</sup>, Jian Hong<sup>62</sup>, Ying-Bin Liu, MD, FACS<sup>2,3,4</sup>, on behalf of the  
23 CRGGC  
24  
25  
26  
27  
28  
29  
30  
31  
32  
33  
34  
35  
36  
37  
38  
39  
40

41 #These authors contributed equally to this work.  
42

43 <sup>1</sup> Department of General Surgery, Xinhua Hospital, Shanghai Jiao Tong University  
44 School of Medicine, Shanghai, China.  
45

46 <sup>2</sup> Shanghai Key Laboratory of Biliary Tract Disease Research, Shanghai, China.  
47

48 <sup>3</sup> State Key Laboratory for Oncogenes and Related Genes, Shanghai, China  
49

50 <sup>4</sup> Department of Biliary-Pancreatic Surgery, Renji Hospital Affiliated to Shanghai  
51 Jiao Tong University School of Medicine, Shanghai, China.  
52

53 <sup>5</sup> Clinical Research Unit, Xinhua Hospital Affiliated to Shanghai Jiao Tong  
54  
55  
56  
57  
58  
59  
60



1  
2  
3  
4 University, School of Medicine, Shanghai, China.

5  
6 <sup>6</sup> Department of General Surgery, Shanxi Provincial Cancer Hospital, Shanxi

7  
8  
9 <sup>7</sup> Department of Hepatobiliary Surgery, The First Affiliated Hospital of Xi'an Jiaotong  
10 University, Shaanxi

11  
12  
13 <sup>8</sup> Department of Hepatobiliary Surgery, People's Hospital of Hunan Province, Hunan

14  
15  
16  
17 <sup>9</sup> Department of HPB Surgery, The First Affiliated Hospital of Harbin Medical  
18 University, Heilongjiang

19  
20  
21 <sup>10</sup> Department of Hepatobiliary Surgery, Shangdong Provincial Hospital, Shandong

22  
23  
24 <sup>11</sup> Department of Hepatobiliary Surgery, Xijing Hospital, Shaanxi

25  
26  
27 <sup>12</sup> Department of HPB Surgery, Sir Run Run Shaw Hospital, Zhejiang

28  
29  
30 <sup>13</sup> Department of Pancreatobiliary Surgery, Tongji Hospital, Hubei

31  
32  
33 <sup>14</sup> Department of Biliary Surgery, Eastern Hepatobiliary Surgery Hospital, Shanghai

34  
35  
36 <sup>15</sup> Department of HPB Surgery, The Second Hospital of Jilin University, Jilin

37  
38  
39 <sup>16</sup> Department of General Surgery, Shanghai General Hospital, Shanghai

40  
41  
42  
43 <sup>17</sup> Department of Surgical Oncology, The First Affiliated Hospital of Bengbu Medical  
44 College, Anhui

45  
46  
47  
48 <sup>18</sup> Department of General Surgery, The First Affiliated Hospital of Wenzhou Medical  
49 University, Zhejiang

50  
51  
52  
53 <sup>19</sup> Department of HPB Surgery, Harbin Medical University Cancer Hospital,  
54 Heilongjiang

55  
56  
57  
58 <sup>20</sup> Department of Hepatobiliary Surgery, Shengjing Hospital of China Medical  
59 University, Liaoning

60  
<sup>21</sup> Department of HPB Surgery, The Affiliated Hospital of Qingdao University,  
Shandong

- 1  
2  
3  
4 22 Department of GI Surgery, China-Japan Union Hospital of Jilin University, Jilin  
5  
6 23 Department of GI Surgery, Shaoxing People's Hospital, Zhejiang  
7  
8 24 Department of General Surgery, Shaoxing Second Hospital, Zhejiang  
9  
10  
11 25 Department of GI Surgery, The First People's Hospital of Taicang, Jiangsu  
12  
13 26 Department of Hepatobiliary Surgery, Wuxi Second People's Hospital, Jiangsu  
14  
15  
16 27 Department of Hepatobiliary Surgery, Nantong Tumor Hospital, Jiangsu  
17  
18 28 Department of General Surgery, Xinhua (Chongming) Hospital Affiliated to  
19  
20 Shanghai Jiao Tong University School of Medicine, Shanghai  
21  
22  
23 29 Department of General Surgery, Changshu No. 1 People's Hospital, Jiangsu  
24  
25 30 Department of Pancreatic Surgery, The First Affiliated Hospital of Xinjiang  
26  
27 Medical University, Xinjiang  
28  
29  
30 31 Department of General Surgery, Tongliao City Hospital, Inner Mongolia  
31  
32 32 Department of Hepatobiliary Surgery, The Second Affiliated Hospital of Nanchang  
33  
34 University, Jiangxi  
35  
36 33 Department of General Surgery, The First Affiliated Hospital of Nanchang  
37  
38 University, Jiangxi  
39  
40  
41 34 Department of HPB Surgery, Changzhou No. 2 People's Hospital, Jiangsu  
42  
43 35 Department of General Surgery, The First Affiliated Hospital of Kunming Medical  
44  
45 University, Yunnan  
46  
47  
48 36 Department of General Surgery, Shanghai Fengxian District Central Hospital,  
49  
50 Shanghai  
51  
52 37 Department of HPB Surgery, The Fifth Affiliated Hospital of Zhengzhou  
53  
54 University, Henan  
55  
56 38 Department of General Surgery, Taizhou Municipal Hospital, Zhejiang  
57  
58  
59  
60

- 1  
2  
3  
4 <sup>39</sup> Department of HPB Surgery, The First Affiliated Hospital of Anhui Medical  
5  
6 University, Anhui  
7  
8 <sup>40</sup> Department of Pancreatobiliary Surgery, The Second Affiliated Hospital of Harbin  
9  
10 Medical University, Heilongjiang  
11  
12 <sup>41</sup> Department of GI Surgery, Xuzhou Central Hospital, Jiangsu  
13  
14  
15 <sup>42</sup> Department of HPB Surgery, Xinghua City People's Hospital, Jiangsu  
16  
17  
18 <sup>43</sup> Department of General Surgery, Zhongshan Hospital, Shanghai  
19  
20  
21 <sup>44</sup> Department of General Surgery, Henan Cancer Hospital, Henan  
22  
23 <sup>45</sup> Department of Pancreatobiliary Surgery, Sun Yat-Sen Memorial Hospital, Sun Yat-  
24 Sen University, Guangdong  
25  
26 <sup>46</sup> Department of Pancreatic Surgery, Tianjin Medical University Cancer Hospital,  
27  
28 Tianjin  
29  
30  
31 <sup>47</sup> Department of HPB Surgery, The First Bethune Hospital of Jilin University, Jilin  
32  
33  
34 <sup>48</sup> Department of Abdominal Surgery, Jiangxi Cancer Hospital, Jiangxi  
35  
36  
37 <sup>49</sup> Department of General Surgery, The First Hospital of Lanzhou University, Gansu  
38  
39  
40 <sup>50</sup> Department of General Surgery, First Hospital of Shanxi Medical University,  
41  
42 Shanxi  
43  
44  
45 <sup>51</sup> Department of General Surgery, Baotou City Central Hospital, Inner Mongolia  
46  
47  
48 <sup>52</sup> Department of Pancreatobiliary Surgery, Nanjing Drum Tower Hospital, the  
49  
50  
51  
52  
53  
54  
55  
56  
57  
58  
59  
60 <sup>55</sup> Department of Hepatobiliary Surgery, Jiangxi Provincial People's Hospital, Jiangxi

1  
2  
3  
4  
5  
6  
7  
8  
9  
10  
11  
12  
13  
14  
15  
16  
17  
18  
19  
20  
21  
22  
23  
24  
25  
26  
27  
28  
29  
30  
31  
32  
33  
34  
35  
36  
37  
38  
39  
40  
41  
42  
43  
44  
45  
46  
47  
48  
49  
50  
51  
52  
53  
54  
55  
56  
57  
58  
59  
60

<sup>56</sup> Department of General Surgery, Qinghai Provincial People's Hospital, Qinghai

<sup>57</sup> Department of General Surgery, Yinzhou Hospital Affiliated to the Medical School of Ningbo University, Zhejiang

<sup>58</sup> Department of Hepatobiliary Surgery, Fujian Provincial Hospital, Fujian

<sup>59</sup> Department of HPB Surgery, Affiliated Hospital of Nantong University, Jiangsu

<sup>60</sup> Department of Hepatobiliary Surgery, The First People's Hospital of Nantong, Jiangsu

<sup>61</sup> Department of General Surgery, The Second Affiliated Hospital of Suzhou University, Jiangsu

<sup>62</sup> Department of General Surgery, The Affiliated Hospital of Xuzhou Medical University, Jiangsu

**Corresponding Authors:**

**Ying-Bin Liu**, Ph.D., M.D., FACS,

Department of Biliary-Pancreatic Surgery, Renji Hospital Affiliated to Shanghai Jiao Tong University School of Medicine.

Address: No. 160 Pujian Road, Shanghai, China.

E-mail: laoniulyb@shsmu.edu.cn

**Keywords:** gallbladder cancer, cohort study, China, clinical epidemiology, tumour staging

## 1 **Abstract**

## 2 **Introduction**

3 Gallbladder cancer (GBC), the sixth most common gastrointestinal tract cancer and  
4 poses a significant disease burden in China. However, no national representative data  
5 are available on the clinical characteristics, treatment, and prognosis of GBC in the  
6 Chinese population.

## 7 **Methods and analysis**

8 The Chinese Research Group of Gallbladder Cancer (CRGGC) study is a multicentre  
9 retrospective registry cohort study. Clinically diagnosed GBC patients will be  
10 identified from January 1, 2008, to December , 2019, by reviewing the electronic  
11 medical records (EMRs) from 76 tertiary and secondary hospitals across 28 provinces  
12 in China. Patients with pathological and radiological diagnoses of malignancy,  
13 including cancer in situ, from the gallbladder and cystic duct are eligible, according to  
14 the National Comprehensive Cancer Network (NCCN) 2019 guidelines. Patients will  
15 be excluded if GBC is the secondary diagnosis in the discharge summary. The  
16 demographic characteristics, medical history, physical examination results, surgery  
17 information, pathological data, laboratory examination results, and radiology reports  
18 will be collected in a standardized case report form. By May 2021, approximately  
19 6,000 GBC patients will be included. The clinical follow-up data will be updated until  
20 5 years after the last admission for GBC of each patient.

21 The study aimed (1) to depict the clinical characteristics, including demographics,  
22 pathology, treatment, and prognosis of GBC patients in China; (2) to evaluate the  
23 adherence to clinical guidelines of GBC; and (3) to improve clinical practice for  
24 diagnosing and treating GBC and provide references for policy makers.

## 25 **Ethics and dissemination**

26 The protocol of the CRGGC has been approved by the Committee for Ethics of  
27 Xinhua Hospital, Shanghai Jiao Tong University School of Medicine (SHEC-C-2019-

1  
2  
3  
4 28 085) and registered in ClinicalTrials.gov (NCT04140552). All results of this study  
5  
6 29 will be published in peer-reviewed journals and presented at relevant conferences.  
7

8 30 **Study registration number:** NCT04140552  
9

10 31 **Strengths and limitations of this study**  
11

- 12  
13 32 1. The Chinese Research Group of Gallbladder Cancer (CRGGC) study is the first  
14  
15 33 large-scale registry cohort study of gallbladder cancer (GBC) in China, covering  
16  
17 34 76 tertiary and secondary hospitals across 28 provinces.  
18  
19 35 2. A standardized quality control and data management plan was designed to ensure  
20  
21 36 the accuracy and reliability of the data.  
22  
23 37 3. The EMR systems are not consistent across hospitals, which may introduce  
24  
25 38 variance in data recording and result in difficulty in systematic data formatting  
26  
27 39 and integration.  
28  
29 40 4. This is a retrospective study using convenience sampling. The study population  
30  
31 41 may not be completely representative of GBC patients in China.  
32  
33 42 5. There is a lack of biospecimens from involved patients. The survival data are not  
34  
35 43 validated through Chinese death registry.  
36  
37  
38  
39  
40  
41  
42  
43  
44

## 45 INTRODUCTION

46 Gallbladder cancer (GBC) is the most common type of biliary tract cancer<sup>1-3</sup> and  
47 one of the most lethal malignancies, with a 5-year survival rate of 5-15%<sup>1 4 5</sup>. Much  
48 effort has been made to optimize the treatment of GBC; however, the prognosis  
49 remains dismal<sup>4 6</sup>, and the quality of current evidence for GBC is still far from perfect.  
50 Due to its relatively low incidence, clinical trials on GBC are difficult to conduct.  
51 Most recommendations and guidelines for GBC from the National Comprehensive  
52 Cancer Network (NCCN; 2019 version 4) and American Joint Committee on Cancer  
53 (AJCC; 8<sup>th</sup> version) were derived from evidence of moderate quality<sup>7 8</sup>. Most of these  
54 studies were single-centre studies with limited sample sizes and generally no more  
55 than 300 cases<sup>9-11</sup>, which might introduce systematic bias into the conclusion.

56 On the other hand, common-used coding systems addressed little on GBC. The  
57 nomenclature of GBC in the literature is inconsistent. GBC defined by the AJCC 8<sup>th</sup>  
58 staging manual is a primary cancer in the gallbladder and cystic duct (C23.9 and part  
59 of C24.0; ICD-O-3 codes)<sup>8</sup>. However, many epidemiological studies refer to “GBC”  
60 as “GBC and extrahepatic cholangiocarcinoma (ECC; C23.9 and C24.0)”, leading to  
61 confusion in its incidence, mortality, and other epidemiological features<sup>12 13</sup>. In  
62 addition, cystic duct cancer is undistinguishable from ECC in most cancer registry  
63 studies, which means that this specific subset of patients is likely to be omitted<sup>14</sup>.  
64 Moreover, a commonly used coding system for surgery, the Facility Oncology  
65 Registry Data System, classifies GBC as “all other sites”, making it unlikely to define  
66 the extent of surgery and distinguish patients who undergo re-resection after GBC is  
67 incidentally found<sup>15</sup>. Regarding regional lymph nodes, the Collaborative Stage  
68 (version 0204) system defines celiac, superior mesenteric, and para-aortic lymph  
69 nodes as regional nodes, which is not consistent with either the AJCC 7<sup>th</sup> or AJCC 8<sup>th</sup>  
70 definition<sup>16</sup>. The coding problems in both patient identification and site-specific  
71 variables might lead to less stringent interpretation of the conclusions.

1  
2  
3  
4 72 China is a high-GBC risk country, but little evidence has been based on the  
5  
6 73 Chinese population<sup>12</sup>. Data from GLOBOCAN show that, taking GBC and ECC  
7  
8 74 together, the number of annual new cases in China accounts for 24.7% of new cases  
9  
10 75 worldwide<sup>13</sup>. Currently, the largest retrospective study of GBC in China was  
11  
12 76 conducted by Zou *et al.*<sup>17</sup>, including 3,922 patients from 116 hospitals in 28 provinces  
13  
14 77 of China during 1986-1998. This study described the demographic characteristics of  
15  
16 78 GBC in China, without further data on detailed staging, treatment, and prognosis  
17  
18 79 information. Another study of 2,379 GBC patients from 5 northwestern provinces  
19  
20 80 during 2009-2013<sup>18</sup> reported that 55.1% of GBC patients had advanced-stage  
21  
22 81 tumours. Other reports were mainly single-centre studies with limited sample sizes<sup>19</sup>  
23  
24 82 <sup>20</sup>. The critical characteristics in the diagnosis, treatment, and prognosis of GBC in  
25  
26 83 China are unknown.

27  
28  
29 84 Therefore, this study aimed to design a GBC cohort, the Chinese Research Group  
30  
31 85 of Gallbladder Cancer (CRGGC) study, (1) to comprehensively evaluate the clinical  
32  
33 86 characteristics, including demographics, pathology, treatment, and prognosis of GBC  
34  
35 87 patients in China; (2) to evaluate adherence to clinical guidelines of GBC; and (3) to  
36  
37 88 improve clinical practice and guidelines for GBC and provide references for policy  
38  
39 89 makers.

## 40 41 90 **METHODS AND ANALYSIS**

### 42 43 44 91 **Registry design**

45  
46 92 The CRGGC study is a multicentre retrospective registry cohort study. The  
47  
48 93 project was launched by the Shanghai Key Laboratory of Biliary Tract Disease  
49  
50 94 Research, with collaborators from 76 tertiary and secondary hospitals across 28  
51  
52 95 provinces in China (until March 8, 2020; see online supplementary file 1). We will  
53  
54 96 review the electronic medical records (EMRs) of all diagnosed GBC patients from  
55  
56 97 January 1, 2008, to December, 2019, and extract the related clinical and treatment  
57  
58 98 information. The clinical follow-up data will be updated until 5 years after the last  
59  
60



1  
2  
3  
4 99 admission of each GBC patient.  
5

## 6 100 **Patient enrolment**

7  
8  
9 101 Patients will be identified with various search strategies: (1) ICD-10 code equals  
10 102 C23.9, or C24.0 with “cystic duct”; (2) discharge diagnosis includes “gallbladder  
11 103 cancer” (search strategy in Chinese: (“胆囊”) AND (“癌” OR “恶性肿瘤” OR “占  
12 104 位”), which means “gallbladder”/“cystic duct” AND (“cancer” OR “malignancy” OR  
13 105 “space-occupying lesion”)); and (3) pathological reports include “gallbladder cancer”.  
14  
15  
16  
17  
18  
19 106 All 3 search strategies will be applied in each centre. The results will be merged for  
20 107 subsequent exclusion. These search strategies are designed to be redundant because  
21 108 some search strategies may not be applicable in specific EMR systems and in specific  
22 109 periods.  
23  
24  
25  
26  
27

28 110 All identified admissions to the hospital will be manually filtered according to  
29 111 the diagnostic criteria of the NCCN 2019 version 4 guidelines for hepatobiliary  
30 112 cancer<sup>7</sup>. Patients with a pathological or radiological diagnosis of malignancy,  
31 113 including cancer in situ, from the gallbladder and cystic duct are eligible. Patients will  
32 114 be excluded if GBC is the secondary diagnosis in the discharge summary because  
33 115 patients admitted for other diseases are likely to have obscure cancer traits.  
34  
35  
36  
37  
38  
39  
40

41 116 The study will include patients diagnosed before December, 2019. According to  
42 117 our preliminary estimation, more than 6,000 cases will meet our inclusion criteria. We  
43 118 expect to finish data collection by May 2021. After finishing enrolment of a short-  
44 119 term target of 2,000 cases, a primary analysis will be performed. The follow-up will  
45 120 be updated until 5 years after the admission of each patient. More centres are expected  
46 121 to participate in the CRGGC study; thus, the collaborator list may be expanded.  
47  
48  
49  
50  
51  
52  
53

## 54 122 **Clinical outcomes and follow-up**

55  
56 123 The main outcome is the 5-year overall survival (OS). OS is defined as the  
57 124 duration from the date of first diagnosis to the date of death, and it is censored at the  
58  
59  
60

1  
2  
3  
4 125 date of the last follow-up when the patients are alive. We will also include the  
5  
6 126 following outcomes: progression-free survival (PFS), defined as the duration between  
7  
8 127 the date of first diagnosis and the date of recurrence, and censored at the date of the  
9  
10 128 last follow-up when the patients have no evidence of recurrence.; cancer-specific  
11  
12 129 survival (CSS), defined as the duration between the date of first diagnosis and the date  
13  
14 130 of cancer-caused death, and censored at the date of the last follow-up when the  
15  
16 131 patients are alive or died from other causes; 3-year OS; and 90-day mortality (for  
17  
18 132 patients who undergo surgery), which will be used to indicate perioperative mortality.  
19  
20 133 Clinical follow-up is defined as the routine practice of hospitals of collecting patient  
21  
22 134 data on treatment, tumour recurrence and patient survival, either by  
23  
24 135 outpatient/inpatient records or telephone. We require hospitals to equip such a system  
25  
26 136 and at least one follow-up per year to join our collaboration. Based on these data, we  
27  
28 137 will update patients' follow-up statuses every 12 months. The data being collected  
29  
30 138 from clinical follow-up will include date of recurrence, date of death, date of last  
31  
32 139 contact, whether re-resection is performed if the malignancy is found incidentally, and  
33  
34 140 whether the patient receives adjuvant therapy.

#### 141 **Data collection**

142 The workflow of data collection and quality control is shown in Fig. 1. Before  
143 data collection, a group of hepatobiliary specialists designed a structured case report  
144 form, aiming to delineate features of GBC patients and answer corresponding clinical  
145 questions. The case report form includes the following information: demographic  
146 characteristics, medical history, physical examination results, surgery information,  
147 pathological data, laboratory examination results, and radiology reports. We have  
148 compiled a codebook to standardize the definition of each variable. The data centre  
149 will be responsible for training doctors to collect data. Data collection will be carried  
150 out by using EpiData (v4.6.0.2, EpiData Association, Denmark).

151 Automated logic checks will be applied to prevent out-of-range values.

1  
2  
3  
4 152 Duplicated entry will be required. If any discrepancies are found, a third specialist  
5  
6 153 will be brought in for discussion and make a final decision.  
7

8 154 After data entry and quality control in each centre, the data will be anonymized  
9  
10 155 and transferred to the servers in the data centre. The data centre is located at Shanghai  
11  
12 156 Key Laboratory of Biliary Tract Disease Research, which is equipped with data  
13  
14 157 servers and essential firewall and backup systems. The data centre will be responsible  
15  
16 158 for quality assessment, storage, sharing, and analysis of the data. A group of  
17  
18 159 researchers in the data centre will manage the database.  
19

20  
21 160 The data manager will assess the quality of the data after transfer to the data  
22  
23 161 centre. The assessment is based on the structure of missing data and a comparison to  
24  
25 162 baseline data. First, we will apply a grading system, where variables are classified into  
26  
27 163 essential, important, and normal importance. Based on the proportion of missing  
28  
29 164 values in each category, the entries will be graded as level A, B, C, or D in quality.  
30  
31 165 Entries of category D quality will be normally excluded from analysis. Second,  
32  
33 166 outliers and inconsistent data will be identified. Third, we will compare baseline  
34  
35 167 characteristics of the new data to previous data, with indicators including sex ratio,  
36  
37 168 mean age, proportion of TNM stage, and 5-year OS. We will apply chi-square test, t-  
38  
39 169 test, and log-rank test between the two datasets. When a significant difference is  
40  
41 170 found, the data manager will analyse and record suspicious data. The data manager  
42  
43 171 will inquire about the data in question with the data source and ask for confirmation.  
44  
45 172 The desensitized data will be accessible to collaborators after the completion of the  
46  
47 173 database. A research proposal to the CRGGC Scientific Committee will be essential  
48  
49 174 for analysis of the data.  
50

## 51 175 **Demographic data and medical history**

52  
53  
54 176 The EMR data for each patient will be collected for every hospital visit from  
55  
56 177 January 1, 2008. The baseline data will be retrieved, including the following aspects:  
57  
58 178 (1) demographics: age at diagnosis, sex, race, and date of diagnosis; (2) medical  
59  
60

1  
2  
3  
4 179 history: emergency operation, chief complaint, endoscopic retrograde cannulation of  
5  
6 180 the pancreas (ERCP) performed within 30 days before surgery, percutaneous  
7  
8 181 transhepatic cholangial drainage (PTCD) performed within 30 days before surgery,  
9  
10 182 neoadjuvant therapy, and method of diagnosis (pathology, radiology, or other); (3)  
11  
12 183 past medical history: history of gallstone, history of gallbladder polyps, history of  
13  
14 184 other malignancies, hypertension, diabetes mellitus, and other comorbidities; (4)  
15  
16 185 social and personal history: marital status, smoking history, and use of alcohol; and  
17  
18 186 (5) other aspects: weight, height, family history, and total expenditure.

### 187 **Surgery information**

- 188 1. The preoperative and intraoperative diagnoses will be recorded. A diagnosis of  
189 “gallbladder cancer”, “gallbladder tumour”, or “space-occupying lesion in  
190 gallbladder” is regarded as the detection of malignancy.
- 191 2. Regional lymphadenectomy requires the resection of hilar nodes<sup>8</sup>. Further  
192 clearance of lymph nodes is classified as extended lymphadenectomy.
- 193 3. The extent of lymphadenectomy includes the cystic duct, common bile duct,  
194 portal vein, hepatic artery, common hepatic artery, post-superior pancreatic,  
195 celiac, superior mesenteric, suprapyloric, left gastric artery, and paraaortic lymph  
196 nodes<sup>8 21 22</sup>.
- 197 4. Combined hepatectomy is classified as no hepatectomy, liver wedge  
198 resection/partial hepatectomy, IVb+V segmentectomy, hemihepatectomy, extent  
199 more than hemihepatectomy, radiofrequency ablation, and hepatectomy for other  
200 reasons.
- 201 5. If the malignancy is diagnosed after surgery, further treatment information may  
202 not be available (the patient may turn to a second hospital for re-resection).  
203 Patients in this case will be categorized as “simple cholecystectomy performed;  
204 further treatment not available”. If re-resection is available, its operative reports

1  
2  
3  
4 205 will be reviewed as previously mentioned.  
5

6 206 6. ERCP, PTCD, and transarterial chemoembolization (TACE) are not defined as  
7  
8 207 surgery but as supportive treatment.  
9

10  
11 208 7. Palliative surgery is defined as resection of the primary tumour, reconstruction of  
12  
13 209 the digestive tract, or both when there is evidence of distant metastasis or  
14  
15 210 unresectable tumour.  
16

17 211 Other surgery-related variables include date of surgery, laparoscopic surgery,  
18  
19 212 combined bile duct resection, tumour positioned on the hepatic or peritoneal side,  
20  
21 213 perivascular invasion, perforation, porcelain gallbladder, duration of surgery,  
22  
23 214 intraoperative blood loss, and American Society of Anesthesiologists (ASA) score.  
24  
25

### 26 215 **Pathological data**

27  
28 216 Pathological data will be recorded, including size of the tumour (in 3  
29  
30 217 dimensions), resection margin, tumour positioned on the hepatic or peritoneal side,  
31  
32 218 tumour positioned on the fundus, body, neck, or cystic duct, depth of invasion  
33  
34 219 (carcinoma in situ or lamina propria, muscularis, perimuscular connective tissue, full  
35  
36 220 layer, serosa, adjacent organ, or major vascular invasion<sup>8</sup>), liver invasion, number of  
37  
38 221 nodes examined, positive lymph nodes, number of hilar nodes examined, positive  
39  
40 222 hilar lymph nodes, region of positive nodes, region of nodes examined (with codes the  
41  
42 223 same as those used for the region of lymphadenectomy in surgery), grade, histology  
43  
44 224 type (using ICD-O-3 codes<sup>23</sup>), microvascular invasion, and perineural invasion.  
45  
46 225 Tumours will be staged according to the AJCC 8<sup>th</sup> staging manual according to  
47  
48 226 pathological reports derived from the aforementioned variables. Notably, the  
49  
50 227 description of “invasion of full layer” for depth of invasion is not suggested in the  
51  
52 228 AJCC 8<sup>th</sup> manual but is commonly used in China.  
53  
54

### 55 229 **Laboratory examination**

56  
57  
58 230 Laboratory examination results for patients will be collected with the date of  
59  
60

1  
2  
3  
4 231 examination. Indicators of interest include the following: (1) routine blood tests: white  
5  
6 232 blood cell count, haemoglobin, and platelet count; (2) liver function tests: total  
7  
8 233 bilirubin, direct bilirubin, albumin, alanine aminotransferase, aspartate  
9  
10 234 aminotransferase, alkaline phosphatase, and gamma-glutamyl transferase; (3) renal  
11  
12 235 function tests: blood urea nitrogen and creatine; (4) lipid indicators: triglycerides and  
13  
14 236 total cholesterol; (5) inflammation indicators: C-reactive protein and lactic  
15  
16 237 dehydrogenase; (6) coagulation indicators: international normalized ratio,  
17  
18 238 prothrombin time, activated partial thromboplastin time, and fibrinogen; (7) tumour  
19  
20 239 markers: carcinoembryonic antigen, carbohydrate antigen 19-9, carbohydrate antigen  
21  
22 240 125, and alpha fetoprotein; and (8) other tests: blood type and hepatitis B test. The test  
23  
24 241 method and normal range of each indicator may vary across hospitals. Thus, we will  
25  
26 242 first uniform the units of each indicator according to the first enrolled hospital; then,  
27  
28 243 based on the first enrolled hospital, we will normalize each result of laboratory  
29  
30 244 examination by its normal range across different hospitals.

### 245 **Radiology reports**

246 Radiological reports will be collected with the date of examination. The following  
247 indicators will be collected: the type of examination (ultrasound, computed tomography,  
248 magnetic resonance imaging, and/or other types) and the conclusion of the examination  
249 (inflammation, polyp, tumour, gallstone, and/or others).

### 250 **Statistical analysis**

251 The continuous variables will be described visually by histogram and summarized  
252 as mean±standard deviation or median (interquartile range), for normal- and skewed-  
253 distributed values. The discrete variables will be summarized as frequency (percentage).  
254 The proportion of missing data will be described, and an indicator of missing will be  
255 deployed for analysis. Differences with a two-sided  $P<0.05$  are considered as  
256 statistically significant.

1  
2  
3  
4 257 We will calculate the average number of GBC diagnosed per year in each hospital,  
5  
6 258 because the volume for cancer patients showed impact on patients' characteristics,  
7  
8 259 treatment modalities, and prognosis<sup>24</sup>. The distribution of hospitals' average GBC  
9  
10 260 patients per year will be described in bar plot; 1 to 2 cut-off points will be determined  
11  
12 261 by inspecting the pattern to classify hospitals into low- and high-volume. Correlation  
13  
14 262 between hospital volume and patients' characteristics will be shown by either Pearson's  
15  
16 263 R, Spearman's  $\rho$ , or  $\chi^2$ , whichever appropriate. Potential correlated variables includes  
17  
18 264 (but not limited to) sex, age at diagnosis, TNM stage, gallstone, surgery type, and  
19  
20  
21 265 adjuvant therapy.

22  
23 266 Time trends for age, sex, TNM stage, surgery type, adjuvant therapy, and diagnosis  
24  
25 267 time will be shown by scatter plot fitted by linear or locally estimated scatterplot  
26  
27 268 smoothing, whichever appropriate.

28  
29  
30 269 The median survival time and loss to follow-up rate will be described. The Kaplan-  
31  
32 270 Meier method will be applied to assess the survival of patients, stratified by TNM stage  
33  
34 271 and by whether surgery performed. Cox proportional hazards regression will be applied  
35  
36 272 to evaluate predictors of prognosis, including (but not limited to) age, sex, T stage, N  
37  
38 273 stage, M stage, adjuvant therapy, extent of resection, gallstone, resection margin,  
39  
40 274 histological grade, perineural invasion, and microvascular invasion.

41  
42 275 As proposed in both NCCN and Chinese Medical Association guidelines<sup>7 25</sup>, GBC  
43  
44 276 more advance than T1b requires resection of liver bed and regional lymphadenectomy.  
45  
46 277 Moreover, patients with nodal metastasis are recommended to take chemotherapy.  
47  
48 278 These three indicators will be described to evaluate the adherence to clinical guidelines  
49  
50 279 of GBC. Also, their significance in prognosis will be tested by survival analysis.

## 51 52 53 280 **Patient and public involvement**

54  
55  
56 281 Patients or the public involvement are not in the plans of this research.  
57  
58  
59  
60

## 282 **ETHICS AND DISSEMINATION**

283 The protocol of the CRGGC has been approved by the Committee for Ethics of  
284 Xinhua Hospital, Shanghai Jiao Tong University School of Medicine (SHEC-C-2019-  
285 085) and registered in ClinicalTrials.gov (NCT04140552). All results of this study will  
286 be published in peer-reviewed journals and presented at relevant conferences.

## 287 **DISCUSSION**

288 The CRGGC study is a large multicentre registry cohort study to evaluate the  
289 clinical presentation, treatment, and prognosis of GBC patients in China. The focus of  
290 CRGGC is to 1) describe the status quo of treatment and survival of GBC patients in  
291 China and 2) improve the standardized treatment of GBC.

292 Upon reviewing the published studies on GBC, we found a lack of large  
293 observational studies on GBC in China focusing on its clinical features and prognosis.  
294 Moreover, international studies on GBC were limited by small sample sizes and  
295 inconsistent coding systems for GBC. Our data will establish a collaborative platform  
296 for GBC research, providing valuable data from China.

297 GBC is a relatively rare but lethal malignancy, making it important to address the  
298 standardization of its primary care, treatment, and post-treatment follow-up.  
299 Researchers have shown unsatisfactory adherence to clinical guidelines. Radical  
300 cholecystectomy was recommended for T1b GBC by the NCCN guidelines nearly 10  
301 years ago; however, only 50% of T1b GBC patients in the U.S. received radical  
302 cholecystectomy<sup>14</sup>. Bergquist et al.<sup>26</sup> reported that from 2004 to 2012, only 28.2% of  
303 GBC patients with positive nodal disease received adjuvant chemotherapy in the  
304 National Cancer Database of the U.S. even though this was the recommended  
305 treatment in the NCCN guidelines. Knowing the current situation is essential for  
306 future improvement; however, no data have been reported on GBC treatment in  
307 China. Well-designed observational studies in China will help to point out weakness



1  
2  
3  
4 308 in clinical practice and, at the same time, summarize valuable clinical experience in  
5  
6 309 the treatment of GBC and pave the way for further standardized treatment.  
7

8 310 GBC cases in China account for nearly 1/4 of cases worldwide; thus, GBC poses  
9  
10 311 a significant disease burden in China. However, few clinical studies of the diagnosis  
11  
12 312 and treatment of GBC have been performed in China, making this significant  
13  
14 313 population underrepresented. By launching the CRGGC study, we also expect to  
15  
16 314 boost collaborations among Chinese researchers. We hope this collaboration could  
17  
18 315 induce further translational research and clinical trials in China, providing essential  
19  
20 316 evidence on GBC treatment.  
21

22  
23 317 There are several limitations and potential biases in our study design. (1) The  
24  
25 318 retrospective nature is inevitably related to information bias and heterogeneity in the  
26  
27 319 data recording. This will cause difficulty in the standardization of data and a relatively  
28  
29 320 large proportion of missing data. To overcome such bias, we composed and continue  
30  
31 321 to update a codebook for standardization of each variable. Researchers responsible for  
32  
33 322 data entry are trained and qualified at the data centre. The missing data are analysed to  
34  
35 323 determine potential bias. (2) This is a retrospective study using convenience sampling.  
36  
37 324 Thus, the cohort may not be completely representative of GBC patients in China.  
38  
39 325 However, we attempt to include centres in every province in China. Moreover, most  
40  
41 326 cancer patients in China are treated in tertiary hospitals. (3) Biospecimens of the  
42  
43 327 involved patients are not collected. Future collaboration on this issue will be  
44  
45 328 considered. (4) As patients with incidental GBC may turn to other hospitals for re-  
46  
47 329 resection, resulting in incomplete treatment information. We addressed this problem  
48  
49 330 by defining these patients separately to aid further sensitivity analysis. (5) Currently  
50  
51 331 we haven't made collaboration with Chinese death registry, thus part of the death  
52  
53 332 information may be lost and the follow-up data might be biased due to lack of  
54  
55 333 validation. On the one hand, the CRGGC study actively seek cooperation with  
56  
57 334 relevant registries; on the other hand, we require collaborated hospitals to equip  
58  
59  
60

1  
2  
3  
4  
5  
6  
7  
8  
9  
10  
11  
12  
13  
14  
15  
16  
17  
18  
19  
20  
21  
22  
23  
24  
25  
26  
27  
28  
29  
30  
31  
32  
33  
34  
35  
36  
37  
38  
39  
40  
41  
42  
43  
44  
45  
46  
47  
48  
49  
50  
51  
52  
53  
54  
55  
56  
57  
58  
59  
60

335 clinical follow-up system, compare prognosis data in each hospital to identify  
336 systematic bias, and update follow-up data yearly.  
337

For peer review only

1  
2  
3  
4 338 **Acknowledgements**  
5

6 339 We would like to thank Prof. Wenyi Yang at Shanghai General Hospital, China, and  
7  
8 340 Prof. Jiong Li at Aarhus University, Denmark, for their valuable advice on the  
9  
10 341 CRGGC registry. We thank our collaborators for their contributions to the CRGGC  
11  
12 342 study, as follows: Prof. Lianxin Liu at Anhui Provincial Hospital, Prof. Xu Liu at  
13  
14 343 Peking University Shenzhen Hospital, Prof. Yinmo Yang at Peking University First  
15  
16 344 Hospital, Prof. Qiang Xu at Peking Union Medical College Hospital, Prof. Banghao  
17  
18 345 Xu at The First Affiliated Hospital of Guangxi Medical University, Prof. Jianhua Liu  
19  
20 346 at The Second Hospital of Hebei Medical University, Prof. Baobiing Yin at Huashan  
21  
22 347 Hospital, Prof. Weilong Cai at Huzhou Central Hospital, Prof. Zhiping Zhang at  
23  
24 348 Ningbo First Hospital, Prof. Xuting Zhi at Qilu Hospital of Shandong University,  
25  
26 349 Prof. Longhua Rao at Central Hospital of Minhang District, Prof. Xiaoping Yang at  
27  
28 350 Shanghai Pudong Hospital, Prof. Jiahua Yang at Putuo District People's Hospital of  
29  
30 351 Shanghai, Prof. Ruiwu Dai at Chengdu Military General Hospital, Prof. Leida Zhang  
31  
32 352 at Southwest Hospital, Prof. Xinbao Wang at Zhejiang Cancer Hospital, Prof. Jinhui  
33  
34 353 Zhou at The Second Affiliated Hospital of Zhejiang University School of Medicine,  
35  
36 354 Prof. Yongjun Chen at Ruijin Hospital, and Prof. Yongwei Sun at Renji Hospital. We  
37  
38 355 would also like to thank the researchers who made significant contributions to the  
39  
40 356 CRGGC registry, as follows: Prof. Min Wang at Tongji Hospital, Prof. Rongsheng  
41  
42 357 Zhang at Shanxi Provincial Cancer Hospital, Dr. Kai Qu at The First Affiliated  
43  
44 358 Hospital of Xi'an Jiaotong University, Prof. Lei Zou at The First Affiliated Hospital of  
45  
46 359 Kunming Medical University, Prof. Fubao Liu at The First Affiliated Hospital of  
47  
48 360 Anhui Medical University, Prof. Leibo Xu at Sun Yat-Sen Memorial Hospital, Sun  
49  
50 361 Yat-Sen University, Prof. Xianhai Mao at People's Hospital of Hunan Province, Prof.  
51  
52 362 Ling Zhang at Henan Cancer Hospital, Dr. Zhizhen Li at Eastern Hepatobiliary  
53  
54 363 Surgery Hospital, and Dr. Lei Wang at Wuxi Second People's Hospital.

55  
56  
57 364 **Authors' Contributions**  
58  
59  
60

1  
2  
3  
4 365 Dr. Yingbin Liu is the principal investigator steering the CRGGC, and responsible for  
5  
6 366 conceptualization, funding acquisition, and supervision of the study. Dr. Tai Ren, Dr.  
7  
8 367 Yongsheng Li, Dr. Xi Zhang, and Dr. Yingbin Liu wrote and revised the manuscript.  
9  
10 368 Dr. Tai Ren, Dr. Yongsheng Li, Dr. Yajun Geng, Dr. Ziyu Shao, Dr. Maolan Li, Dr.  
11  
12 369 Xiangsong Wu, Dr. Xu-An Wang, Dr. Wenguang Wu, Dr. Yijun Shu, Dr. Runfa Bao,  
13  
14 370 Dr. Wei Gong, and Dr. Ping Dong discussed and drafted the case report form,  
15  
16 371 standard operation procedure in data collection and management, and standard of  
17  
18 372 quality control. Dr. Tai Ren and Dr. Yongsheng Li are responsible for data curation  
19  
20 373 and coordination. Dr. Xi Zhang is responsible for the methodology. Dr. Tai Ren, Dr.  
21  
22 374 Yongsheng Li, and Dr. Xi Zhang will be responsible for data analysis and reporting of  
23  
24 375 the work. Dr. Xueyi Dang, Dr. Chang Liu, Dr. Changjun Liu, Dr. Bei Sun, Dr. Jun  
25  
26 376 Liu, Dr. Lin Wang, Dr. Defei Hong, Dr. Renyi Qin, Dr. Xiaoqing Jiang, Dr. Xuewen  
27  
28 377 Zhang, Dr. Junmin Xu, Dr. Jianguang Jia, Dr. Bo Yang, Dr. Bing Li, Dr. Chaoliu Dai,  
29  
30 378 Dr. Jingyu Cao, Dr. Hong Cao, Dr. Feng Tao, Dr. Zaiyang Zhang, Dr. Yi Wang, Dr.  
31  
32 379 Huihan Jin, Dr. Hongyu Cai, Dr. Zhewei Fei, Dr. Jianfeng Gu, Dr. Wei Han, Dr.  
33  
34 380 Xuedong Feng, Dr. Lu Fang, Dr. Linhui Zheng, Dr. Chunfu Zhu, Dr. Kunhua Wang,  
35  
36 381 Dr. Xueli Zhang, Dr. Xiaoyong Li, Dr. Chong Jin, Dr. Yeben Qian, Dr. Yunfu Cui,  
37  
38 382 Dr. Yuzhen Xu, Dr. Xiang Wang, Dr. Houbao Liu, Dr. Yawei Hua, Dr. Chao Liu, Dr.  
39  
40 383 Jihui Hao, Dr. Chuanlei Wang, Dr. Qiyun Li, Dr. Xun Li, Dr. Jiansheng Liu, Dr.  
41  
42 384 Mingzhang Li, Dr. Yudong Qiu, Dr. Buqiang Wu, Dr. Jinfang Zheng, Dr. Xiaoliang  
43  
44 385 Chen, Dr. Haihong Zhu, Dr. Kejun Hua, Dr. Maolin Yan, Dr. Peng Wang, Dr. Hong  
45  
46 386 Zang, Dr. Xiaoming Ma, Dr. Jian Hong, Dr. Wei Gong, and Dr. Yingbin Liu are  
47  
48 387 responsible for resources, data collection, and quality control in collaborated  
49  
50 388 hospitals. All authors reviewed the manuscript for intellectual content and approved  
51  
52 389 the final version of the report.

#### 390 **Funding statement**

391 This study was supported by the National Natural Science Foundation of China (No.

1  
2  
3  
4 392 31620103910, 81874181, and 91940305), the Emerging Frontier Program of Hospital  
5  
6 393 Development Center (No. SHDC12018107), the Key Program of Shanghai Science  
7  
8 394 and Technology Commission (No. YDZX20193100004049), the Shanghai Key  
9  
10 395 Laboratory of Biliary Tract Disease Research Foundation (17DZ2260200), the  
11  
12 396 Shanghai Artificial Intelligence Innovation and Development Project (2019, Project of  
13  
14 397 Xinhua Hospital Affiliated to Shanghai Jiao Tong University School of Medicine), the  
15  
16 398 Multi-Center Clinical Research Project of Shanghai Jiao Tong University School of  
17  
18 399 Medicine (DLY201507) and the Translational Medicine Innovation Fund of Shanghai  
19  
20 400 Jiao Tong University School of Medicine (15ZH4003).

21  
22 401 **Competing interests statement**

23  
24  
25 402 All authors declare no competing interests.

26  
27 403 **Word Count:**

28  
29  
30 404 3237 (from introduction to discussion)

31  
32 405

33  
34  
35 406

407 **References**

- 408 1. Hundal R, Shaffer EA. Gallbladder cancer: epidemiology and outcome. *Clin Epidemiol*  
409 2014;6:99-109. doi: 10.2147/CLEP.S37357 [published Online First: 2014/03/19]
- 410 2. Misra S, Chaturvedi A, Misra NC, et al. Carcinoma of the gallbladder. *The Lancet Oncology*  
411 2003;4(3):167-76. doi: 10.1016/s1470-2045(03)01021-0
- 412 3. Li M, Zhang Z, Li X, et al. Whole-exome and targeted gene sequencing of gallbladder carcinoma  
413 identifies recurrent mutations in the ErbB pathway. *Nat Genet* 2014;46(8):872-6. doi:  
414 10.1038/ng.3030 [published Online First: 2014/07/07]
- 415 4. Lindner P, Holmberg E, Hafstrom L. Gallbladder cancer - no improvement in survival over time  
416 in a Swedish population. *Acta Oncol* 2018;57(11):1482-89. doi:  
417 10.1080/0284186X.2018.1478124 [published Online First: 2018/06/23]
- 418 5. Surveillance, Epidemiology, and End Results (SEER) Program (www.seer.cancer.gov) Research  
419 Data (1973-2016), National Cancer Institute, DCCPS, Surveillance Research Program,  
420 released April 2019, based on the May 2019 submission.
- 421 6. Creasy JM, Goldman DA, Gonen M, et al. Evolution of surgical management of gallbladder  
422 carcinoma and impact on outcome: results from two decades at a single-institution. *HPB :  
423 the official journal of the International Hepato Pancreato Biliary Association*  
424 2019;21(11):1541-51. doi: 10.1016/j.hpb.2019.03.370 [published Online First: 2019/04/28]
- 425 7. NCCN Clinical Practice Guidelines in Oncology: Hepatobiliary Cancers, Version 4. 2019:  
426 National Comprehensive Cancer Network,; 2019 [2020-02-13]. Available from:  
427 [https://www.nccn.org/professionals/physician\\_gls/pdf/hepatobiliary.pdf](https://www.nccn.org/professionals/physician_gls/pdf/hepatobiliary.pdf).
- 428 8. American Joint Committee on Cancer. AJCC Cancer Staging Manual, 8th Edition 2017.
- 429 9. Shindoh J, de Aretxabala X, Aloia TA, et al. Tumor location is a strong predictor of tumor  
430 progression and survival in T2 gallbladder cancer: an international multicenter study. *Ann  
431 Surg* 2015;261(4):733-9. doi: 10.1097/SLA.0000000000000728 [published Online First:  
432 2014/05/24]
- 433 10. Amini N, Kim Y, Wilson A, et al. Prognostic Implications of Lymph Node Status for Patients  
434 With Gallbladder Cancer: A Multi-Institutional Study. *Ann Surg Oncol* 2016;23(9):3016-  
435 23. doi: 10.1245/s10434-016-5243-y [published Online First: 2016/05/07]
- 436 11. Ito H, Ito K, D'Angelica M, et al. Accurate staging for gallbladder cancer: implications for  
437 surgical therapy and pathological assessment. *Ann Surg* 2011;254(2):320-5. doi:  
438 10.1097/SLA.0b013e31822238d8 [published Online First: 2011/05/28]

- 1  
2  
3 439 12. Tuo J, Zhang M, Zheng R, et al. [Report of incidence and mortality of gallbladder cancer in  
4 440 China, 2014]. *Chin J Oncol* 2018;40(12):894-99. doi: 10.3760/cma.j.issn.0253-  
5 441 3766.2018.12.004
- 6  
7  
8 442 13. Bray F, Ferlay J, Soerjomataram I, et al. Global cancer statistics 2018: GLOBOCAN estimates  
9 443 of incidence and mortality worldwide for 36 cancers in 185 countries. *CA Cancer J Clin*  
10 444 2018;68(6):394-424. doi: 10.3322/caac.21492 [published Online First: 2018/09/13]
- 11  
12  
13 445 14. Vo E, Curley SA, Chai CY, et al. National Failure of Surgical Staging for T1b Gallbladder  
14 446 Cancer. *Ann Surg Oncol* 2019;26(2):604-10. doi: 10.1245/s10434-018-7064-7 [published  
15 447 Online First: 2018/12/01]
- 16  
17  
18 448 15. Facility Oncology Registry Data System. 3rd ed, ed. Chicago, IL: American College of Surgeons  
19 449 2002.
- 20  
21  
22 450 16. Collaborative Stage Work Group of the American Joint Committee on Cancer. Collaborative  
23 451 Stage Data Collection System User Documentation and Coding Instructions. version 02.04  
24 452 ed. Chicago, IL: American Joint Committee on Cancer 2012.
- 25  
26  
27 453 17. Zou S, Zhang L. [Clinical epidemiologic characteristics of carcinoma of gallbladder in China].  
28 454 *Chinese Journal of Practical Surgery* 2000;20(1):43-46.
- 29  
30  
31 455 18. Shen H, Song H, Wang L, et al. [Clinical feature of gallbladder cancer in Northwestern China:  
32 456 a report of 2379 cases from 17 institutions]. *Chinese Journal of Surgery* 2015;53(10):747-  
33 457 51. doi: 10.3760/cma.j.issn.0529-5815.2015.10.007
- 34  
35  
36 458 19. Hsing AW, Gao Y-T, Devesa SS, et al. Rising incidence of biliary tract cancers in Shanghai,  
37 459 China. *Int J Cancer* 1998;75:368-70. doi: 10.1002/(sici)1097-  
38 460 0215(19980130)75:3<368::aid-ijc7>3.0.co;2-0
- 39  
40  
41 461 20. Bao PP, Zheng Y, Wu CX, et al. Cancer incidence in urban Shanghai, 1973-2010: an updated  
42 462 trend and age-period-cohort effects. *BMC Cancer* 2016;16:284. doi: 10.1186/s12885-016-  
43 463 2313-2 [published Online First: 2016/04/23]
- 44  
45  
46 464 21. Brierley JD, Gospodarowicz MK, Wittekind C. TNM Classification of Malignant Tumours, 8th  
47 465 ed: Wiley 2018.
- 48  
49  
50 466 22. Kishi Y, Shimada K, Hata S, et al. Definition of T3/4 and Regional Lymph Nodes in Gallbladder  
51 467 Cancer: Which Is More Valid, the UICC or the Japanese Staging System? *Annals of*  
52 468 *Surgical Oncology* 2012;19(11):3567-73. doi: 10.1245/s10434-012-2599-5
- 53  
54  
55 469 23. World Health Organization. International classification of diseases for oncology (ICD-O) – 3rd  
56 470 edition, 1st revision. 3rd ed. ed. Geneva 2013.
- 57  
58  
59  
60

- 1  
2  
3  
4 471 24. Hata T, Motoi F, Ishida M, et al. Effect of Hospital Volume on Surgical Outcomes After  
5 472 Pancreaticoduodenectomy: A Systematic Review and Meta-analysis. *Ann Surg*  
6 473 2016;263(4):664-72. doi: 10.1097/SLA.0000000000001437 [published Online First:  
7 474 2015/12/05]
- 8  
9  
10 475 25. Chinese Society of Biliary Surgery. [Guidelines for the diagnosis and treatment of gallbladder  
11 476 carcinoma (2015 edition)]. *Chin J Dig Surg* 2015;14(11):881-90.
- 12  
13  
14 477 26. Bergquist JR, Shah HN, Habermann EB, et al. Adjuvant systemic therapy after resection of node  
15 478 positive gallbladder cancer: Time for a well-designed trial? (Results of a US-national  
16 479 retrospective cohort study). *Int J Surg* 2018;52:171-79. doi: 10.1016/j.ijso.2018.02.052  
17 480 [published Online First: 2018/03/03]
- 18  
19  
20  
21  
22  
23  
24  
25  
26  
27  
28  
29  
30  
31  
32  
33  
34  
35  
36  
37  
38  
39  
40  
41  
42  
43  
44  
45  
46  
47  
48  
49  
50  
51  
52  
53  
54  
55  
56  
57  
58  
59  
60



1  
2  
3  
4 481 **Figure legends**

5  
6 482 Fig. 1 Workflow of data collection and quality control in CRGGC.

7  
8 483  
9  
10  
11  
12  
13  
14  
15  
16  
17  
18  
19  
20  
21  
22  
23  
24  
25  
26  
27  
28  
29  
30  
31  
32  
33  
34  
35  
36  
37  
38  
39  
40  
41  
42  
43  
44  
45  
46  
47  
48  
49  
50  
51  
52  
53  
54  
55  
56  
57  
58  
59  
60

For peer review only

1  
2  
3  
4  
5  
6  
7  
8  
9  
10  
11  
12  
13  
14  
15  
16  
17  
18  
19  
20  
21  
22  
23  
24  
25  
26  
27  
28  
29  
30  
31  
32  
33  
34  
35  
36  
37  
38  
39  
40  
41  
42  
43  
44  
45  
46  
47  
48  
49  
50  
51  
52  
53  
54  
55  
56  
57  
58  
59  
60

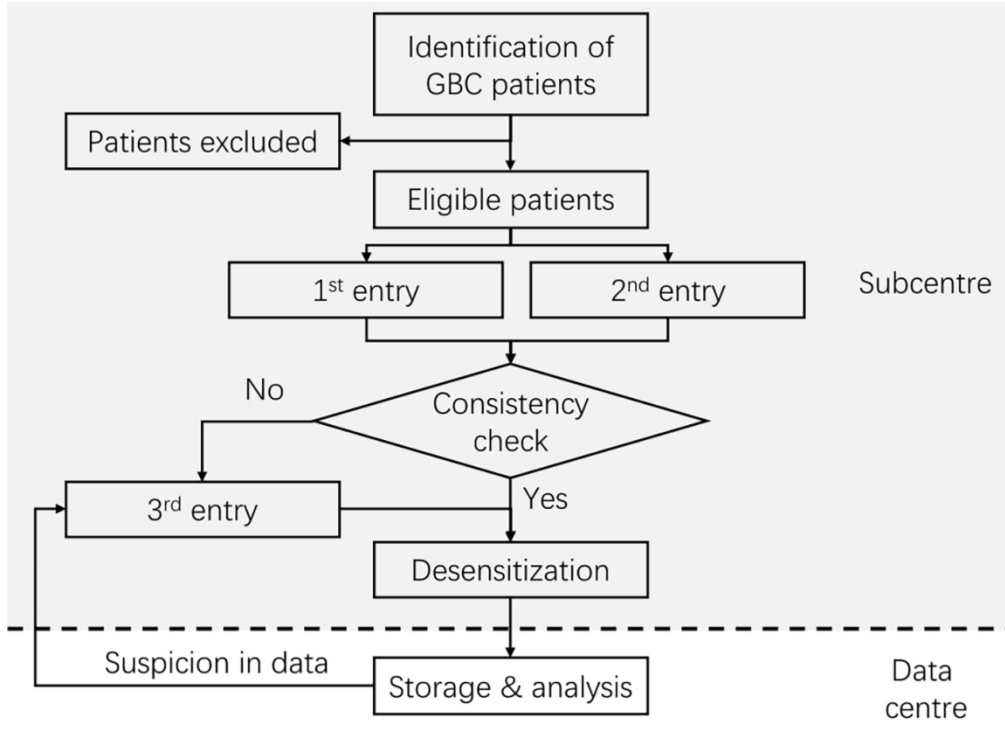

Fig. 1 Workflow of data collection and quality control in CRGGC.

118x90mm (300 x 300 DPI)

## Protocol for a national gallbladder cancer registry study in China: the Chinese Research Group of Gallbladder Cancer (CRGGC) study

Tai Ren; Yongsheng Li, Xi Zhang, ... , Ying-Bin Liu, MD, FACS, on behalf of the CRGGC

### ONLINE SUPPLEMENTARY FILE 1

List of collaborators in the Chinese Research Group of Gallbladder Cancer (CRGGC) study

| Province | Hospital                                                                                   | Principle investigator |
|----------|--------------------------------------------------------------------------------------------|------------------------|
| Shanghai | Xin Hua Hospital Affiliated to Shanghai Jiao Tong University School of Medicine            | Prof. Yingbin Liu      |
| Shanghai | Eastern Hepatobiliary Surgery Hospital                                                     | Prof. Xiaoqing Jiang   |
| Shanghai | Shanghai General Hospital                                                                  | Prof. Junmin Xu        |
| Shanghai | Zhongshan Hospital                                                                         | Prof. Houbao Liu       |
| Shanghai | Huashan Hospital                                                                           | Prof. Baobiing Yin     |
| Shanghai | Ruijin Hospital                                                                            | Prof. Yongjun Chen     |
| Shanghai | Renji Hospital                                                                             | Prof. Yongwei Sun      |
| Shanghai | Shanghai Fengxian District Central Hospital                                                | Prof. Xueli Zhang      |
| Shanghai | Shanghai Pudong Hospital                                                                   | Prof. Xiaoping Yang    |
| Shanghai | Central Hospital of Minhang District, Shanghai                                             | Prof. Longhua Rao      |
| Shanghai | Putuo District People's Hospital of Shanghai                                               | Prof. Jiahua Yang      |
| Shanghai | Xinhua (Chongming) Hospital Affiliated to Shanghai Jiao Tong University School of Medicine | Prof. Zhewei Fei       |
| Zhejiang | Sir Run Run Shaw Hospital                                                                  | Prof. Defei Hong       |
| Zhejiang | The Second Affiliated Hospital of Zhejiang University School of medicine                   | Prof. Jinhui Zhou      |

|          |                                                                                           |                     |
|----------|-------------------------------------------------------------------------------------------|---------------------|
| Zhejiang | Zhejiang Cancer Hospital                                                                  | Prof. Xinbao Wang   |
| Zhejiang | The First Affiliated Hospital of Wenzhou Medical University                               | Dr. Bo Yang         |
| Zhejiang | Shaoxing People's Hospital                                                                | Prof. Feng Tao      |
| Zhejiang | Shaoxing Second Hospital                                                                  | Prof. Zaiyang Zhang |
| Zhejiang | Yinzhou Hospital Affiliated to Medical School of Ningbo University                        | Prof. Kejun Hua     |
| Zhejiang | Huzhou Central Hospital                                                                   | Prof. Weilong Cai   |
| Zhejiang | Ningbo First Hospital                                                                     | Prof. Zhiping Zhang |
| Zhejiang | Taizhou Municipal Hospital                                                                | Prof. Chong Jin     |
| Jiangsu  | Nanjing Drum Tower Hospital, the Affiliated Hospital of Nanjing University Medical School | Prof. Yudong Qiu    |
| Jiangsu  | The Second Affiliated Hospital of Suzhou University                                       | Prof. Xiaoming Ma   |
| Jiangsu  | The Affiliated Hospital of Xuzhou Medical University                                      | Prof. Jian Hong     |
| Jiangsu  | Xuzhou Central Hospital                                                                   | Prof. Yuzhen Xu     |
| Jiangsu  | Wuxi Second People's Hospital                                                             | Prof. Huihan Jin    |
| Jiangsu  | Changshu No.1 People's Hospital                                                           | Prof. Jianfeng Gu   |
| Jiangsu  | Changzhou No.2 People's Hospital                                                          | Prof. Chunfu Zhu    |
| Jiangsu  | Affiliated Hospital of Nantong University                                                 | Prof. Peng Wang     |
| Jiangsu  | Nantong Tumor Hospital                                                                    | Prof. Hongyu Cai    |
| Jiangsu  | The First People's Hospital of Nantong                                                    | Prof. Hong Zang     |
| Jiangsu  | The First People's Hospital of Taicang                                                    | Prof. Yi Wang       |
| Jiangsu  | Xinghua City People's Hospital                                                            | Prof. Xiang Wang    |
| Beijing  | Peking Union Medical College Hospital                                                     | Prof. Qiang Xu      |
| Beijing  | Peking University First Hospital                                                          | Prof. Yinmo Yang    |
| Tianjin  | Tianjin Medical University Cancer Hospital                                                | Prof. Jihui Hao     |
| Hebei    | The Second Hospital of Hebei Medical University                                           | Prof. Jianhua Liu   |
| Henan    | Henan Cancer Hospital                                                                     | Prof. Yawei Hua     |

|                |                                                             |                      |
|----------------|-------------------------------------------------------------|----------------------|
| Henan          | The Fifth Affiliated Hospital of Zhengzhou University       | Prof. Xiaoyong Li    |
| Shandong       | Shandong Provincial Hospital                                | Prof. Jun Liu        |
| Shandong       | Qilu Hospital of Shandong University                        | Prof. Xuting Zhi     |
| Shandong       | The Affiliated Hospital of Qingdao University               | Prof. Jingyu Cao     |
| Shanxi         | Heping Hospital Affiliated to Changzhi Medical College      | Prof. Buqiang Wu     |
| Shanxi         | First Hospital of Shanxi Medical University                 | Prof. Jiansheng Liu  |
| Shanxi         | Shanxi Provincial Cancer Hospital                           | Prof. Xueyi Dang     |
| Inner Mongolia | Baotou City Central Hospital                                | Prof. Mingzhang Li   |
| Inner Mongolia | Tongliao City Hospital                                      | Prof. Xuedong Feng   |
| Heilongjiang   | The First Affiliated Hospital of Harbin Medical University  | Prof. Bei Sun        |
| Heilongjiang   | The Second Affiliated Hospital of Harbin Medical University | Prof. Yunfu Cui      |
| Heilongjiang   | Harbin Medical University Cancer Hospital                   | Prof. Bing Li        |
| Jilin          | The First Bethune Hospital of Jilin University              | Prof. Chuanlei Wang  |
| Jilin          | The Second Hospital of Jilin University                     | Prof. Xuewen Zhang   |
| Jilin          | China-Japan Union Hospital of Jilin University              | Prof. Hong Cao       |
| Liaoning       | Shengjing Hospital of China Medical University              | Prof. Chaoliu Dai    |
| Hubei          | Tongji Hospital                                             | Prof. Renyi Qin      |
| Hunan          | People's Hospital of Hunan Province                         | Prof. Changjun Liu   |
| Anhui          | The First Affiliated Hospital of Anhui Medical University   | Prof. Yeben Qian     |
| Anhui          | Anhui Provincial Hospital                                   | Prof. Lianxin Liu    |
| Anhui          | The First Affiliated Hospital of Bengbu Medical College     | Prof. Jianguang Jia  |
| Jiangxi        | The Second Affiliated Hospital of Nanchang University       | Prof. Lu Fang        |
| Jiangxi        | The First Affiliated Hospital of Nanchang University        | Prof. Linhui Zheng   |
| Jiangxi        | Jiangxi Provincial People's Hospital                        | Prof. Xiaoliang Chen |
| Jiangxi        | Jiangxi Cancer Hospital                                     | Prof. Qiyun Li       |

1  
2  
3  
4  
5  
6  
7  
8  
9  
10  
11  
12  
13  
14  
15  
16  
17  
18  
19  
20  
21  
22  
23  
24  
25  
26  
27  
28  
29  
30  
31  
32  
33  
34  
35  
36  
37  
38  
39  
40  
41  
42  
43  
44  
45  
46

|           |                                                              |                     |
|-----------|--------------------------------------------------------------|---------------------|
| Shaanxi   | The First Affiliated Hospital of Xi'an Jiaotong University   | Prof. Chang Liu     |
| Shaanxi   | Xijing Hospital                                              | Prof. Lin Wang      |
| Gansu     | The First Hospital of Lanzhou University                     | Prof. Xun Li        |
| Qinghai   | Qinghai Provincial People's Hospital                         | Prof. Haihong Zhu   |
| Xinjiang  | The First Affiliated Hospital of Xinjiang Medical University | Prof. Wei Han       |
| Chongqing | Southwest Hospital                                           | Prof. Leida Zhang   |
| Sichuan   | Chengdu Military General Hospital                            | Prof. Ruiwu Dai     |
| Yunnan    | The First Affiliated Hospital of Kunming Medical University  | Prof. Kunhua Wang   |
| Fujian    | Fujian Provincial Hospital                                   | Prof. Maolin Yan    |
| Guangdong | Sun Yat-Sen Memorial Hospital, Sun Yat-Sen University        | Prof. Chao Liu      |
| Guangdong | Peking University Shenzhen Hospital                          | Prof. Xu Liu        |
| Guangxi   | The First Affiliated Hospital of Guangxi Medical University  | Prof. Banghao Xu    |
| Hainan    | Hainan Provincial People's Hospital                          | Prof. Jinfang Zheng |

Review only

**STROBE checklist of cohort studies**

|                              | <b>Item No</b> | <b>Recommendation</b>                                                                                                                                                                               | <b>Page Number</b> |
|------------------------------|----------------|-----------------------------------------------------------------------------------------------------------------------------------------------------------------------------------------------------|--------------------|
| <b>Title and abstract</b>    | 1              | (a) Indicate the study's design with a commonly used term in the title or the abstract                                                                                                              | 6                  |
|                              |                | (b) Provide in the abstract an informative and balanced summary of what was done and what was found                                                                                                 | 6                  |
| <b>Introduction</b>          |                |                                                                                                                                                                                                     |                    |
| Background/rationale         | 2              | Explain the scientific background and rationale for the investigation being reported                                                                                                                | 8                  |
| Objectives                   | 3              | State specific objectives, including any prespecified hypotheses                                                                                                                                    | 9                  |
| <b>Methods</b>               |                |                                                                                                                                                                                                     |                    |
| Study design                 | 4              | Present key elements of study design early in the paper                                                                                                                                             | 9                  |
| Setting                      | 5              | Describe the setting, locations, and relevant dates, including periods of recruitment, exposure, follow-up, and data collection                                                                     | 10-11              |
| Participants                 | 6              | (a) Give the eligibility criteria, and the sources and methods of selection of participants. Describe methods of follow-up                                                                          | 10                 |
|                              |                | (b) For matched studies, give matching criteria and number of exposed and unexposed                                                                                                                 | NA                 |
| Variables                    | 7              | Clearly define all outcomes, exposures, predictors, potential confounders, and effect modifiers. Give diagnostic criteria, if applicable                                                            | 10-15              |
| Data sources/<br>measurement | 8*             | For each <b>variable of interest</b> , give sources of data and details of methods of assessment (measurement). Describe <b>comparability of assessment</b> methods if there is more than one group | 10-15              |
| Bias                         | 9              | Describe <b>any efforts to address potential sources of bias</b>                                                                                                                                    | 16                 |
| Study size                   | 10             | Explain how the <b>study size</b> was arrived at                                                                                                                                                    | 10                 |
| Quantitative variables       | 11             | Explain how quantitative variables were handled in the analyses. If applicable, describe which groupings were chosen and why                                                                        | 12-16              |
| Statistical methods          | 12             | (a) Describe <b>all statistical methods</b> , including those used to control for confounding                                                                                                       | 15-16              |
|                              |                | (b) Describe any methods used to <b>examine subgroups and interactions</b>                                                                                                                          | NA                 |
|                              |                | (c) Explain how <b>missing data</b> were addressed                                                                                                                                                  | 15                 |
|                              |                | (d) If applicable, explain how <b>loss to follow-up</b> was addressed                                                                                                                               | 10-11;<br>16       |

(e) Describe any **sensitivity analyses** NA  
 - Current analysis focused mainly on descriptive statistics. When specific questions are addressed in future analysis, sensitivity analyses will be designed.

---

## Results

|                   |     |                                                                                                                                                                                                              |    |
|-------------------|-----|--------------------------------------------------------------------------------------------------------------------------------------------------------------------------------------------------------------|----|
| Participants      | 13* | (a) Report numbers of individuals at each stage of study—eg numbers potentially eligible, examined for eligibility, confirmed eligible, included in the study, completing follow-up, and analysed            | NA |
|                   |     | (b) Give reasons for non-participation at each stage                                                                                                                                                         | NA |
|                   |     | (c) Consider use of a flow diagram                                                                                                                                                                           | NA |
| Descriptive data  | 14* | (a) Give characteristics of study participants (eg demographic, clinical, social) and information on exposures and potential confounders                                                                     | NA |
|                   |     | (b) Indicate number of participants with missing data for each variable of interest                                                                                                                          | NA |
|                   |     | (c) Summarise follow-up time (eg, average and total amount)                                                                                                                                                  | NA |
| Outcome data      | 15* | Report numbers of outcome events or summary measures over time                                                                                                                                               | NA |
| Main results      | 16  | (a) Give unadjusted estimates and, if applicable, confounder-adjusted estimates and their precision (eg, 95% confidence interval). Make clear which confounders were adjusted for and why they were included | NA |
|                   |     | (b) Report category boundaries when continuous variables were categorized                                                                                                                                    | NA |
|                   |     | (c) If relevant, consider translating estimates of relative risk into absolute risk for a meaningful time period                                                                                             | NA |
| Other analyses    | 17  | Report other analyses done—eg analyses of subgroups and interactions, and sensitivity analyses                                                                                                               | NA |
| <b>Discussion</b> |     |                                                                                                                                                                                                              |    |
| Key results       | 18  | Summarise key results with reference to study objectives                                                                                                                                                     | 17 |
| Limitations       | 19  | Discuss limitations of the study, taking into account sources of potential bias or imprecision. Discuss both direction and magnitude of any potential bias                                                   | 17 |
| Interpretation    | 20  | Give a cautious overall interpretation of results considering objectives, limitations, multiplicity of analyses, results from similar studies, and other relevant evidence                                   | NA |
| Generalisability  | 21  | Discuss the generalisability (external validity) of the study results                                                                                                                                        | NA |



**Other information**

---

|         |    |                                                            |    |
|---------|----|------------------------------------------------------------|----|
| Funding | 22 | Give the source of funding and the role of the funders     | 18 |
|         |    | for the present study and, if applicable, for the original |    |
|         |    | study on which the present article is based                |    |

---

For peer review only
