# Supplementary material for: Protocol for a gallbladder cancer registry study in China: the Chinese Research Group of Gallbladder Cancer (CRGGC) study
Source: PubMed Central journal article supplement — BMJ Open. 2021 Feb 16;11(2):e038634. doi: 10.1136/bmjopen-2020-038634 (PMC7888310; doi:10.1136/bmjopen-2020-038634), 2021-02-16
Supplement: bmjopen-2020-038634supp001.pdf [file bmjopen-2020-038634supp001.pdf]

## Protocol for a national gallbladder cancer registry study in China: the Chinese Research Group of Gallbladder Cancer (CRGGC) study

Tai Ren; Yongsheng Li, Xi Zhang, ... , Ying-Bin Liu, MD, FACS, on behalf of the CRGGC

### ONLINE SUPPLEMENTARY FILE 1

List of collaborators in the Chinese Research Group of Gallbladder Cancer (CRGGC) study

| Province | Hospital                                                                                   | Principle investigator |
|----------|--------------------------------------------------------------------------------------------|------------------------|
| Shanghai | Xin Hua Hospital Affiliated to Shanghai Jiao Tong University School of Medicine            | Prof. Yingbin Liu      |
| Shanghai | Eastern Hepatobiliary Surgery Hospital                                                     | Prof. Xiaoqing Jiang   |
| Shanghai | Shanghai General Hospital                                                                  | Prof. Junmin Xu        |
| Shanghai | Zhongshan Hospital                                                                         | Prof. Houbao Liu       |
| Shanghai | Huashan Hospital                                                                           | Prof. Baobiing Yin     |
| Shanghai | Ruijin Hospital                                                                            | Prof. Yongjun Chen     |
| Shanghai | Renji Hospital                                                                             | Prof. Yongwei Sun      |
| Shanghai | Shanghai Fengxian District Central Hospital                                                | Prof. Xueli Zhang      |
| Shanghai | Shanghai Pudong Hospital                                                                   | Prof. Xiaoping Yang    |
| Shanghai | Central Hospital of Minhang District, Shanghai                                             | Prof. Longhua Rao      |
| Shanghai | Putuo District People's Hospital of Shanghai                                               | Prof. Jiahua Yang      |
| Shanghai | Xinhua (Chongming) Hospital Affiliated to Shanghai Jiao Tong University School of Medicine | Prof. Zhewei Fei       |
| Zhejiang | Sir Run Run Shaw Hospital                                                                  | Prof. Defei Hong       |
| Zhejiang | The Second Affiliated Hospital of Zhejiang University School of medicine                   | Prof. Jinhui Zhou      |

|          |                                                                                           |                     |
|----------|-------------------------------------------------------------------------------------------|---------------------|
| Zhejiang | Zhejiang Cancer Hospital                                                                  | Prof. Xinbao Wang   |
| Zhejiang | The First Affiliated Hospital of Wenzhou Medical University                               | Dr. Bo Yang         |
| Zhejiang | Shaoxing People's Hospital                                                                | Prof. Feng Tao      |
| Zhejiang | Shaoxing Second Hospital                                                                  | Prof. Zaiyang Zhang |
| Zhejiang | Yinzhou Hospital Affiliated to Medical School of Ningbo University                        | Prof. Kejun Hua     |
| Zhejiang | Huzhou Central Hospital                                                                   | Prof. Weilong Cai   |
| Zhejiang | Ningbo First Hospital                                                                     | Prof. Zhiping Zhang |
| Zhejiang | Taizhou Municipal Hospital                                                                | Prof. Chong Jin     |
| Jiangsu  | Nanjing Drum Tower Hospital, the Affiliated Hospital of Nanjing University Medical School | Prof. Yudong Qiu    |
| Jiangsu  | The Second Affiliated Hospital of Suzhou University                                       | Prof. Xiaoming Ma   |
| Jiangsu  | The Affiliated Hospital of Xuzhou Medical University                                      | Prof. Jian Hong     |
| Jiangsu  | Xuzhou Central Hospital                                                                   | Prof. Yuzhen Xu     |
| Jiangsu  | Wuxi Second People's Hospital                                                             | Prof. Huihan Jin    |
| Jiangsu  | Changshu No.1 People's Hospital                                                           | Prof. Jianfeng Gu   |
| Jiangsu  | Changzhou No.2 People's Hospital                                                          | Prof. Chunfu Zhu    |
| Jiangsu  | Affiliated Hospital of Nantong University                                                 | Prof. Peng Wang     |
| Jiangsu  | Nantong Tumor Hospital                                                                    | Prof. Hongyu Cai    |
| Jiangsu  | The First People's Hospital of Nantong                                                    | Prof. Hong Zang     |
| Jiangsu  | The First People's Hospital of Taicang                                                    | Prof. Yi Wang       |
| Jiangsu  | Xinghua City People's Hospital                                                            | Prof. Xiang Wang    |
| Beijing  | Peking Union Medical College Hospital                                                     | Prof. Qiang Xu      |
| Beijing  | Peking University First Hospital                                                          | Prof. Yinmo Yang    |
| Tianjin  | Tianjin Medical University Cancer Hospital                                                | Prof. Jihui Hao     |
| Hebei    | The Second Hospital of Hebei Medical University                                           | Prof. Jianhua Liu   |
| Henan    | Henan Cancer Hospital                                                                     | Prof. Yawei Hua     |

|                |                                                             |                      |
|----------------|-------------------------------------------------------------|----------------------|
| Henan          | The Fifth Affiliated Hospital of Zhengzhou University       | Prof. Xiaoyong Li    |
| Shandong       | Shandong Provincial Hospital                                | Prof. Jun Liu        |
| Shandong       | Qilu Hospital of Shandong University                        | Prof. Xuting Zhi     |
| Shandong       | The Affiliated Hospital of Qingdao University               | Prof. Jingyu Cao     |
| Shanxi         | Heping Hospital Affiliated to Changzhi Medical College      | Prof. Buqiang Wu     |
| Shanxi         | First Hospital of Shanxi Medical University                 | Prof. Jiansheng Liu  |
| Shanxi         | Shanxi Provincial Cancer Hospital                           | Prof. Xueyi Dang     |
| Inner Mongolia | Baotou City Central Hospital                                | Prof. Mingzhang Li   |
| Inner Mongolia | Tongliao City Hospital                                      | Prof. Xuedong Feng   |
| Heilongjiang   | The First Affiliated Hospital of Harbin Medical University  | Prof. Bei Sun        |
| Heilongjiang   | The Second Affiliated Hospital of Harbin Medical University | Prof. Yunfu Cui      |
| Heilongjiang   | Harbin Medical University Cancer Hospital                   | Prof. Bing Li        |
| Jilin          | The First Bethune Hospital of Jilin University              | Prof. Chuanlei Wang  |
| Jilin          | The Second Hospital of Jilin University                     | Prof. Xuewen Zhang   |
| Jilin          | China-Japan Union Hospital of Jilin University              | Prof. Hong Cao       |
| Liaoning       | Shengjing Hospital of China Medical University              | Prof. Chaoliu Dai    |
| Hubei          | Tongji Hospital                                             | Prof. Renyi Qin      |
| Hunan          | People's Hospital of Hunan Province                         | Prof. Changjun Liu   |
| Anhui          | The First Affiliated Hospital of Anhui Medical University   | Prof. Yeben Qian     |
| Anhui          | Anhui Provincial Hospital                                   | Prof. Lianxin Liu    |
| Anhui          | The First Affiliated Hospital of Bengbu Medical College     | Prof. Jianguang Jia  |
| Jiangxi        | The Second Affiliated Hospital of Nanchang University       | Prof. Lu Fang        |
| Jiangxi        | The First Affiliated Hospital of Nanchang University        | Prof. Linhui Zheng   |
| Jiangxi        | Jiangxi Provincial People's Hospital                        | Prof. Xiaoliang Chen |
| Jiangxi        | Jiangxi Cancer Hospital                                     | Prof. Qiyun Li       |

|           |                                                              |                     |
|-----------|--------------------------------------------------------------|---------------------|
| Shaanxi   | The First Affiliated Hospital of Xi'an Jiaotong University   | Prof. Chang Liu     |
| Shaanxi   | Xijing Hospital                                              | Prof. Lin Wang      |
| Gansu     | The First Hospital of Lanzhou University                     | Prof. Xun Li        |
| Qinghai   | Qinghai Provincial People's Hospital                         | Prof. Haihong Zhu   |
| Xinjiang  | The First Affiliated Hospital of Xinjiang Medical University | Prof. Wei Han       |
| Chongqing | Southwest Hospital                                           | Prof. Leida Zhang   |
| Sichuan   | Chengdu Military General Hospital                            | Prof. Ruiwu Dai     |
| Yunnan    | The First Affiliated Hospital of Kunming Medical University  | Prof. Kunhua Wang   |
| Fujian    | Fujian Provincial Hospital                                   | Prof. Maolin Yan    |
| Guangdong | Sun Yat-Sen Memorial Hospital, Sun Yat-Sen University        | Prof. Chao Liu      |
| Guangdong | Peking University Shenzhen Hospital                          | Prof. Xu Liu        |
| Guangxi   | The First Affiliated Hospital of Guangxi Medical University  | Prof. Banghao Xu    |
| Hainan    | Hainan Provincial People's Hospital                          | Prof. Jinfang Zheng |
